# Supplementary material for: Tosyl/pyrrolyl-capped 1,3-enynes via t-BuOK-assisted reaction of TosMIC with acylethynylpyrroles: a new feature of this popular reagent
Source: Royal Society of Chemistry journal article supplement (doi:10.1039/d2nj02827a), 2022-01-01

## Supporting Information

### Tosyl/pyrrolyl-capped 1,3-enynes via *t*-BuOK-assisted reaction of TosMIC with acylethynylpyrroles: a new feature of the popular reagent

Maxim D. Gotsko, Ivan V. Saliy, Igor A. Ushakov, Lyubov' N. Sobenina, Boris A. Trofimov

*A.E. Favorsky Irkutsk Institute of Chemistry, Siberian Branch of the Russian Academy of Sciences, 1 Favorsky St., Irkutsk  
664033, Russian Federation*

\*Corresponding author: Tel.: 7 (3952) 51-14-31; fax 7 (3952) 41-93-46; e-mail: [boris\\_trofimov@irioch.irk.ru](mailto:boris_trofimov@irioch.irk.ru)

#### Table of contents

|                                                                                               |       |
|-----------------------------------------------------------------------------------------------|-------|
| 1. General information .....                                                                  | 2     |
| 2. Starting materials .....                                                                   | 2     |
| 3. The reaction of 2-acylethynylpyrroles ( <b>1a-o</b> ) with TosMIC.....                     | 3     |
| 4. Scale reaction .....                                                                       | 8     |
| 5. The reaction of 4-(1-methyl-1H-pyrrol-2-yl)but-3-yn-2-one ( <b>1p</b> ) with TosMIC .....  | 9     |
| 6. The reaction of 1-(1-methyl-1H-pyrrol-2-yl)pent-1-yn-3-one ( <b>1q</b> ) with TosMIC ..... | 9     |
| 7. The reaction of 1-phenylpent-1-yn-3-one ( <b>1r</b> ) with TosMIC .....                    | 10    |
| 8. <sup>1</sup> H and <sup>13</sup> C NMR spectra:.....                                       | 10-63 |

## 1. General information

IR spectra were obtained with a Bruker Vertex 70 spectrometer (400–4000  $\text{cm}^{-1}$ , films).  $^1\text{H}$  (400.13 MHz),  $^{13}\text{C}$  (100.6 MHz) spectra were recorded on a Bruker DPX-400 spectrometer at ambient temperature in  $\text{CDCl}_3$  solutions and referenced to  $\text{CDCl}_3$  (residual protons of  $\text{CDCl}_3$  in  $^1\text{H}$  NMR  $\delta = 7.26$  ppm;  $^{13}\text{C}$  NMR  $\delta = 77.1$  ppm). The assignment of signals in the  $^1\text{H}$  NMR spectra was made using COSY and NOESY experiments. Resonance signals of carbon atoms were assigned based on  $^1\text{H}$ - $^{13}\text{C}$  HSQC and  $^1\text{H}$ - $^{13}\text{C}$  HMBC experiments. In the HMBC spectra of compound **2a**, cross-peaks between the signals of the olefin proton and the *C-ipso* of benzene ring and C-2 of enine chain are observed (Figure S1). Evidence for the configurational assignment of the olefinic fragment is the comparison of the vicinal constants  $^3J_{\text{C-}ipso,\text{H}}$  and  $^3J_{\text{C-}2,\text{H}}$ . For the *E*-isomer, the coupling  $^3J_{\text{C-}ipso,\text{H}}$  constant is 5.4 Hz and  $^3J_{\text{C-}2,\text{H}}$  is 12.5 Hz. Vicinal  $^3J_{\text{C}2,\text{H}}$  (8.2 Hz) and  $^3J_{\text{C-}ipso,\text{H}}$  (8.9 Hz) coupling constants correspond to a *cis* position of the olefinic proton with respect to C-2, that is, *Z*- configuration of adduct **2a** (Figure S1). The similar effects in the NMR spectra of other tosylpyrrolylenines **2** were also observed.

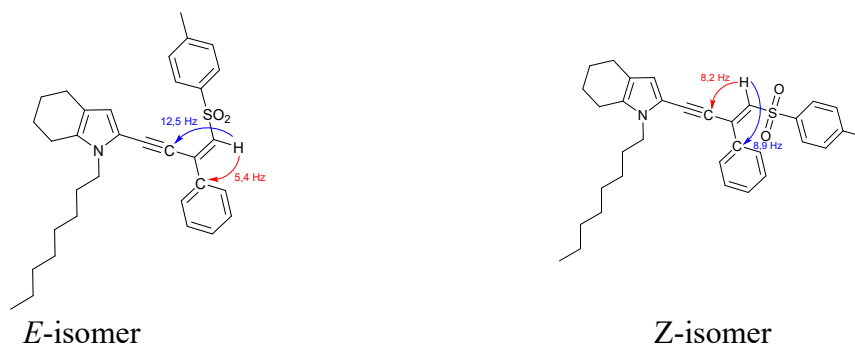

Figure 1. Main HMBC correlations of 1-octyl-2-(3-phenyl-4-tosylbut-3-en-1-yn-1-yl)-1H-pyrrole (**2a**)

The C, H, N microanalyses were performed on a Flash EA 1112 CHNS-O/MAS analyzer. Sulfur was determined by complexometric titration with Chlorasenazo III. Fluorine content was determined on a SPECOL 11 (Carl Zeiss Jena, Germany) spectrophotometer. Chlorine was determined by mercurimetric titration. Melting point (uncorrected) was determined on a Kofler micro hot-stage apparatus.

## 2. Starting materials

Acylethynylpyrroles **1a-m,p,q** were prepared from corresponding pyrroles and acylbromoacetylenes in the presence of  $\text{Al}_2\text{O}_3$  according to the reported procedure.<sup>1</sup> 1,3-Diphenylprop-2-yn-1-one (**1n**), 1-(furan-2-yl)-3-phenylprop-2-yn-1-one (**1o**), 1-phenylpent-1-yn-3-one (**1r**), tosylmethylisocyanide (TosMIC), *t*-BuOK and THF are commercial products.

### 3-(1-Octyl-4,5,6,7-tetrahydro-1H-indol-2-yl)-1-(thiophen-2-yl)prop-2-yn-1-one (**1i**)

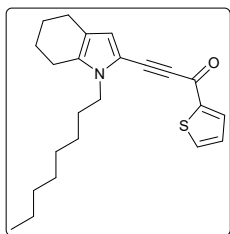

Yield 276 mg (75%), yellow crystals; m.p. 58-60°C. Anal. Calcd for C<sub>23</sub>H<sub>29</sub>NOS: C, 75.16; H, 7.95; N, 3.81; S, 8.72%. Found: C, 75.3; H, 8.09; N, 3.98; S, 8.54%.  $\nu_{\max}$  (KBr) 3092, 2926, 2854, 2158, 1605, 1558, 1515, 1489, 1441, 1411, 1391, 1354, 1308, 1265, 1230, 1207, 1196, 1144, 1101, 1080, 1048, 1008, 987, 954, 929, 856, 824, 802, 720, 631 cm<sup>-1</sup>. <sup>1</sup>H NMR (400.13 MHz, CDCl<sub>3</sub>):  $\delta$  7.88-7.87 (m, 1H, H5-thiophene), 7.65-7.64 (m, 1H, H3-thiophene), 7.16-7.14 (m, 1H, H4-thiophene), 6.61 (s, 1H, pyrrole), 4.00-3.96 (m, 2H, NCH<sub>2</sub>), 2.59-2.55 (m, 2H, CH<sub>2</sub>-7), 2.52-2.49 (m, 2H, CH<sub>2</sub>-4), 1.85-1.83 (m, 2H, CH<sub>2</sub>-5), 1.76-1.75 (m, 4H, CH<sub>2</sub>, CH<sub>2</sub>-6), 1.33-1.24 (m, 10H, 5CH<sub>2</sub>), 0.86 (t,  $J$  = 6.8 Hz, 3H, CH<sub>3</sub>). <sup>13</sup>C NMR (100.6 MHz, CDCl<sub>3</sub>)  $\delta$  169.1, 145.5, 135.5, 133.8, 133.2, 128.2, 119.9 (2C), 110.2, 95.8, 89.0, 45.1, 31.8, 31.3, 29.4, 29.3, 26.9, 23.3, 23.0, 22.9, 22.8, 22.7, 14.1.

### 1-(1-Methyl-1H-pyrrol-2-yl)pent-1-yn-3-one (**1q**)

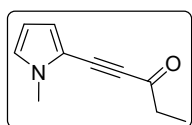

Yield 217 mg (67%), yellow crystals; m.p. 48-50°C. Anal. Calcd for C<sub>10</sub>H<sub>11</sub>NO: C, 74.51; H, 6.88; N, 8.69%. Found: C, 74.68; H, 7.01; N, 8.87%.  $\nu_{\max}$  (KBr) 3285, 3130, 3106, 2982, 2942, 2898, 2171, 1767, 1653, 1572, 1482, 1454, 1421, 1404, 1377, 1343, 1317, 1244, 1189, 1122, 1041, 1014, 985, 984, 798, 756, 635, 604, 545, 496, 453 cm<sup>-1</sup>. <sup>1</sup>H NMR (400.13 MHz, CDCl<sub>3</sub>):  $\delta$  6.80-6.79 (m, 1H, pyrrole), 6.70 (dd,  $J$  = 1.6, 3.9 Hz, 1H, pyrrole), 6.14 (dd,  $J$  = 2.6, 3.9 Hz, 1H, pyrrole), 3.72 (s, 3H, N-CH<sub>3</sub>), 2.64 (q,  $J$  = 7.4 Hz, 2H, CH<sub>2</sub>), 1.21 (t,  $J$  = 4.0 Hz, 3H, CH<sub>3</sub>). <sup>13</sup>C NMR (100.6 MHz, CDCl<sub>3</sub>)  $\delta$  187.9, 127.4, 120.8, 112.8, 109.5, 95.2, 85.2, 38.3, 34.8, 8.5.

(1) Trofimov, B. A.; Stepanova, Z. V.; Sobenina, L. N.; Mikhaleva, A. b. I.; Ushakov, I. A., Ethynylation of pyrroles with 1-acyl-2-bromoacetylenes on alumina: a formal 'inverse Sonogashira coupling'. Tetrahedron Lett. 2004, 45, 6513-6516.

### 3. The reaction of 2-acylethynylpyrroles (**1a-o**) with TosMIC

A solution of acylethynylpyrrole **1** (1 mmol) and TosMIC (395 mg, 2 mmol) in THF (10 mL) was heated to reflux. Then, under reflux, solution of *t*-BuOK (224 mg, 2 mmol) in THF (10 mL) was added dropwise to reaction mixture for 1 hour. The residue, after removing solvent, was fractionated by column chromatography (SiO<sub>2</sub>, *n*-hexane : diethyl ether, 5 : 1) to afford the tosylpyrrolylenines **2a-o**.

(*E*) 1-Octyl-2-(3-phenyl-4-tosylbut-3-en-1-yn-1-yl)-4,5,6,7-tetrahydro-1H-indole (**2a**), *E/Z* = 10:1.

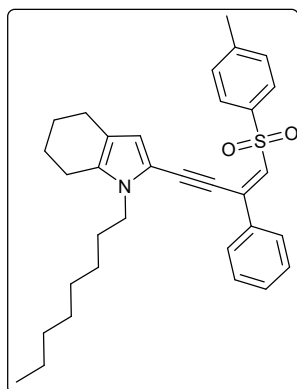

Yield 334 mg (65%), yellow crystals; m.p. 48-50°C. Anal. Calcd for C<sub>33</sub>H<sub>39</sub>NO<sub>2</sub>S: C, 77.15; H, 7.65; N, 2.73; S, 6.24%. Found: C, 77.33; H, 7.82; N, 2.92; S, 6.09%.  $\nu_{\max}$  (KBr) 3060, 2926, 2853, 2167, 1595, 1565, 1545, 1489, 1464, 1390, 1316, 1301, 1239, 1184, 1145, 1084, 1016, 913, 823, 810, 746, 666, 565, 538 cm<sup>-1</sup>. <sup>1</sup>H NMR (400.13 MHz, CDCl<sub>3</sub>):  $\delta$  7.97-7.95 (m, 2H, Ph), 7.66-7.64 (m, 2H, Ph), 7.40-7.29 (m, 5H, Ph), 6.79 (s, 1H, =CH), 6.53 (s, 1H, H-3, pyrrole), 4.02-3.99 (m, 2H,

NCH<sub>2</sub>), 2.60-2.57 (m, 2H, CH<sub>2</sub>-7), 2.55-2.52 (m, 2H, CH<sub>2</sub>-4), 2.41 (s, 3H, CH<sub>3</sub>), 1.90-1.84 (m, 2H, CH<sub>2</sub>), 1.78-1.67 (m, 4H, CH<sub>2</sub>-5,6), 1.31-1.21 (m, 10H, 5CH<sub>2</sub>), 0.84 (t, *J* = 6.8 Hz, 3H, CH<sub>3</sub>). <sup>13</sup>C NMR (100.6 MHz, CDCl<sub>3</sub>) δ 144.1, 139.4, 136.6, 136.3, 133.7, 130.4, 129.8 (2C), 128.8 (2C), 127.9, 127.7 (2C), 127.3 (2C), 119.5, 117.2, 112.2, 101.4, 91.1, 45.1, 31.9, 31.6, 29.5, 29.3, 26.8 (2C), 23.5, 23.2, 22.7 (2C), 21.7, 14.2.

(*Z*) 1-Octyl-2-(3-phenyl-4-tosylbut-3-en-1-yn-1-yl)-4,5,6,7-tetrahydro-1H-indole (**2a**), *E/Z* = 10:1.

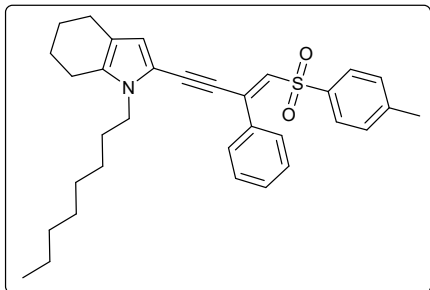

<sup>1</sup>H NMR (400.13 MHz, CDCl<sub>3</sub>): δ 7.53-7.51 (m, 2H, Ph), 7.66-7.64 (m, 2H, Ph), 7.40-7.29 (m, 3H, Ph), 7.20-7.18 (m, 2H, Ph), 6.75 (s, 1H, =CH), 6.29 (s, 1H, H-3, pyrrole), 3.37-3.35 (m, 2H, NCH<sub>2</sub>), 2.60-2.57 (m, 2H, CH<sub>2</sub>-7), 2.55-2.52 (m, 2H, CH<sub>2</sub>-4), 2.39 (s, 3H, CH<sub>3</sub>), 1.90-1.84 (m, 2H, CH<sub>2</sub>), 1.78-1.67 (m, 4H, CH<sub>2</sub>-5,6), 1.31-1.21 (m, 10H, 5CH<sub>2</sub>), 0.84 (t, *J* = 6.8 Hz, 3H, CH<sub>3</sub>). <sup>13</sup>C NMR (100.6 MHz, CDCl<sub>3</sub>) δ 144.0,

139.4 (2C), 138.9, 137.9, 134.9, 133.4, 130.8, 130.6, 128.7 (2C), 127.9 (2C), 127.2 (2C), 118.6, 116.1, 111.7, 94.7, 93.5, 45.1, 31.9, 31.6, 29.5, 29.3, 26.8 (2C), 23.5, 23.2, 22.7 (2C), 21.7, 14.2.

1-Methyl-2-(3-(thiophen-2-yl)-4-tosylbut-3-en-1-yn-1-yl)-1H-pyrrole (**2b**), *E/Z* = 4:1.

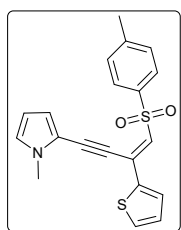

Yield 213 mg (58%), yellow crystals; m.p. 66-68°C. Anal. Calcd for C<sub>20</sub>H<sub>17</sub>NO<sub>2</sub>S<sub>2</sub>: C, 65.37; H, 4.66; N, 3.81; S, 17.45%. Found: C, 65.5; H, 4.85; N, 3.95; S, 17.27%.  $\nu_{\max}$  (KBr) 3106, 3051, 2923, 2853, 2183, 1595, 1558, 1521, 1511, 1473, 1418, 1361, 1318, 1290, 1232, 1200, 1182, 1145, 1083, 1052, 1020, 980, 966, 910, 855, 826, 811, 774, 732, 656, 600, 553, 535 cm<sup>-1</sup>. <sup>1</sup>H NMR (400.13 MHz, CDCl<sub>3</sub>): δ 7.94-7.92 (m, 2H, Ph), 7.50-7.49 (m,

1H, H-5, thiophene), 7.41-7.39 (m, 1H, H-3, thiophene), 7.32-7.30 (m, 2H, Ph), 7.07-7.04 (m, 1H, H-4, thiophene), 6.83 (s, 1H, =CH), 6.80-6.79 (m, 1H, H-5, pyrrole), 6.71-6.70 (m, 1H, H-4, pyrrole), 6.21-6.19 (m, 1H, H-3, pyrrole), 3.88 (s, 3H, N-CH<sub>3</sub>), 2.41 (s, 3H, CH<sub>3</sub>). <sup>13</sup>C NMR (100.6 MHz, CDCl<sub>3</sub>): δ 144.4, 140.4, 139.3, 133.2, 129.9 (2C), 129.3, 129.1, 128.9, 128.3, 127.7 (2C), 126.4, 126.1, 118.6, 109.5, 97.3, 89.0, 35.3, 21.8.

1-Benzyl-2-(3-phenyl-4-tosylbut-3-en-1-yn-1-yl)-1H-pyrrole (**2c**), *E/Z* = 9:1.

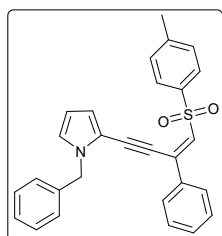

Yield 241 mg (55%), yellow crystals; m.p. 53-55°C. Anal. Calcd for C<sub>28</sub>H<sub>23</sub>NO<sub>2</sub>S: C, 76.86; H, 5.30; N, 3.20; S, 7.33%. Found: C, 76.98; H, 5.49; N, 3.32; S, 7.23%.  $\nu_{\max}$  (KBr) 3059, 3032, 2959, 2924, 2854, 2180, 1596, 1558, 1521, 1494, 1467, 1454, 1417, 1316, 1300, 1233, 1182, 1144, 1093, 1031, 911, 807, 732, 695, 672, 612, 570, 540 cm<sup>-1</sup>.

<sup>1</sup>H NMR (400.13 MHz, CDCl<sub>3</sub>): 7.84-7.82 (m, 2H, Ph), 7.57-5.55 (m, 2H, Ph), 7.40-7.38 (m, 1H, Ph), 7.35-7.31 (m, 4H, Ph, Ph), 7.28-7.27 (m, 1H, Ph), 7.23-7.21 (m, 2H, Ph), 7.16-7.14 (m, 2H, Ph), 6.86 (s, 1H, =CH), 6.85-6.84 (m, 1H, H-5, pyrrole), 6.79-6.78 (m, 1H, H-4, pyrrole), 6.29-6.27 (m, 1H, H-3, pyrrole), 5.43 (s, 2H, CH<sub>2</sub>Ph), 2.40 (s, 3H, CH<sub>3</sub>). <sup>13</sup>C NMR (100.6 MHz, CDCl<sub>3</sub>): δ 144.1, 138.8, 138.0, 135.9, 135.5, 130.4, 129.6 (2C), 129.4, 128.7 (4C), 127.6 (2C), 127.5, 127.2 (2C), 126.9 (2C), 125.6, 118.6, 114.7, 110.0, 98.8, 90.1, 51.3, 21.6.

*1-Methyl-2-phenyl-5-(3-phenyl-4-tosylbut-3-en-1-yn-1-yl)-1H-pyrrole (2d)*, E/Z = 4:1.

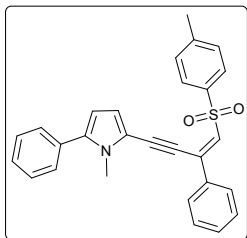

Yield 271 mg (62%), yellow crystals; m.p. 76-78°C. Anal. Calcd for C<sub>28</sub>H<sub>23</sub>NO<sub>2</sub>S: C, 76.86; H, 5.30; N, 3.20; S, 7.33%. Found: C, 77.04; H, 5.48; N, 3.35; S, 7.17%.  $\nu_{\max}$  (KBr) 3061, 2923, 2853, 2175, 1597, 1559, 1534, 1491, 1458, 1395, 1376, 1315, 1303, 1231, 1216, 1185, 1145, 1084, 1019, 1001, 911, 827, 812, 755, 734, 699, 666, 591, 565, 538 cm<sup>-1</sup>. <sup>1</sup>H NMR (400.13 MHz, CDCl<sub>3</sub>): 7.99-7.96 (m, 2H, Ph), 7.69-7.68 (m, 2H, Ph), 7.45-7.32 (m, 10H, Ph), 6.88 (s, 1H, =CH), 6.81-6.79 (m, 1H, H-4, pyrrole), 6.31-6.30 (m, 1H, H-3, pyrrole), 3.87 (s, 3H, N-CH<sub>3</sub>), 2.43 (s, 3H, CH<sub>3</sub>). <sup>13</sup>C NMR (100.6 MHz, CDCl<sub>3</sub>):  $\delta$  144.4, 139.1, 136.2, 135.8, 132.4, 130.6, 129.9 (2C), 129.6, 129.1, 128.9 (2C), 128.8 (2C), 128.7 (2C), 127.9, 127.7 (2C), 127.3 (2C), 118.5, 116.3, 110.2, 99.8, 91.0, 33.8, 21.8.

*(E)-2-(3-(Furan-2-yl)-4-tosylbut-3-en-1-yn-1-yl)-1-methyl-5-phenyl-1H-pyrrole (2e)*.

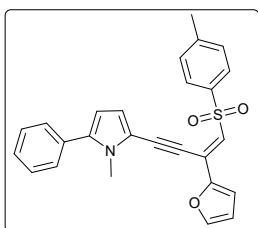

Yield 222 mg (52%), green crystals; m.p. 98-100°C. Anal. Calcd for C<sub>26</sub>H<sub>21</sub>NO<sub>3</sub>S: C, 73.05; H, 4.95; N, 3.28; S, 7.50%. Found: C, 73.26; H, 5.18; N, 3.45; S, 7.39%.  $\nu_{\max}$  (KBr) 3123, 3064, 2956, 2922, 2852, 2185, 1582, 1531, 1500, 1471, 1456, 1392, 1345, 1314, 1302, 1292, 1219, 1145, 1084, 1018, 999, 910, 825, 811, 771, 757, 734, 563, 532, 498 cm<sup>-1</sup>. <sup>1</sup>H NMR (400.13 MHz, CDCl<sub>3</sub>):  $\delta$  7.95-7.93 (m, 2H, Ph), 7.46-7.45 (m, 5H, Ph), 7.39-7.36 (m, 1H, H-5, furan), 7.33-7.31 (m, 2H, Ph), 6.94 (s, 1H, =CH), 6.92-6.91 (m, 1H, H-3, furan), 6.77 (d, *J* = 3.9 Hz, 1H, H-3, pyrrole), 6.49 (dd, *J* = 3.4, 1.8 Hz, 1H, H-4, furan), 6.30 (d, *J* = 3.9 Hz, 1H, H-4, pyrrole), 3.89 (s, 3H, N-CH<sub>3</sub>), 2.42 (s, 3H, CH<sub>3</sub>). <sup>13</sup>C NMR (100.6 MHz, CDCl<sub>3</sub>): 150.2, 145.1, 144.3, 139.4, 139.0, 132.4, 129.9 (2C), 128.9 (2C), 128.7 (2C), 127.9, 127.6 (2C), 124.6, 123.8, 118.2, 116.1, 114.8, 112.7, 110.1, 96.2, 88.1, 33.8, 21.7.

*(E)-2-(3-(Furan-2-yl)-4-tosylbut-3-en-1-yn-1-yl)-1-methyl-5-(thiophen-2-yl)-1H-pyrrole (2f)*.

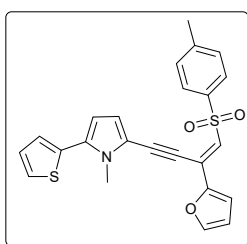

Yield 282 mg (65%), yellow crystals; m.p. 60-62°C. Anal. Calcd for C<sub>24</sub>H<sub>19</sub>NO<sub>3</sub>S<sub>2</sub>: C, 66.49; H, 4.42; N, 3.23; S, 14.79%. Found: C, 66.66; H, 4.53; N, 3.33; S, 14.62%.  $\nu_{\max}$  (KBr) 3111, 3068, 2948, 2921, 2185, 1582, 1545, 1506, 1467, 1445, 1417, 1390, 1351, 1317, 1304, 1219, 1197, 1184, 1145, 1084, 1049, 1026, 1011, 982, 911, 880, 825, 812, 768, 732, 702, 674, 652, 590, 561, 531 cm<sup>-1</sup>. <sup>1</sup>H NMR (400.13 MHz, CDCl<sub>3</sub>): 7.93-7.91 (m, 2H, Ph), 7.47-7.45 (m, 1H, H-5, thiophene), 7.35-7.31 (m, 3H, Ph, H-5, furan), 7.17-7.16 (m, 1H, H-3, thiophene), 7.12-7.10 (m, 1H, thiophene), 6.93 (s, 1H, =CH), 6.90-8.89 (m, 1H, H-3, furan), 6.72 (d, *J* = 3.9 Hz, 1H, H-4, pyrrole), 6.49 (dd, *J* = 3.2, 1.7 Hz, 1H, H-4, furan), 6.39 (d, *J* = 3.9 Hz, 1H, H-3, pyrrole), 3.98 (s, 3H, N-CH<sub>3</sub>), 2.42 (s, 3H, CH<sub>3</sub>). <sup>13</sup>C NMR (100.6 MHz, CDCl<sub>3</sub>):  $\delta$  149.6, 144.6, 143.8, 138.8, 133.4, 131.1, 129.3 (2C), 127.2, 127.1, 127.0 (2C), 125.5, 125.2, 124.2, 123.1, 117.6, 114.2, 112.1, 110.3, 95.2, 87.6, 33.3, 21.2.

*(E)*-2-(4-Chlorophenyl)-5-(3-phenyl-4-tosylbut-3-en-1-yn-1-yl)-1-vinyl-1H-pyrrole (**2g**).

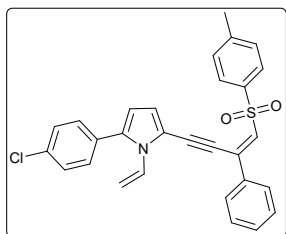

Yield 179 mg (37%), yellow crystals; m.p. 58-60°C. Anal. Calcd for C<sub>29</sub>H<sub>22</sub>ClNO<sub>2</sub>S: C, 71.97; H, 4.58; Cl, 7.32; N, 2.89; S, 6.62%. Found: C, 72.11; H, 4.73; Cl, 7.48; N, 3.00; S, 6.47%.  $\nu_{\max}$  (KBr) 3061, 2922, 2852, 2162, 1670, 1643, 1596, 1558, 1532, 1492, 1460, 1421, 1385, 1319, 1303, 1237, 1220, 1182, 1146, 1087, 1015, 964, 909, 830, 812, 780, 734, 695, 664, 597, 565, 541, 502 cm<sup>-1</sup>. <sup>1</sup>H NMR (400.13 MHz, CDCl<sub>3</sub>):  $\delta$  7.98-7.96 (m, 2H, Ph), 7.66-7.64 (m, 2H, Ph), 7.42-7.39 (m, 6H, Ph), 7.33-7.31 (m, 3H, Ph), 7.03 (dd,  $J$  = 8.9, 15.8, Hz, 1H, H<sub>x</sub>), 6.93 (s, 1H, =CH), 6.88 (d,  $J$  = 3.9 Hz, 1H, H-4, pyrrole), 6.35 (d,  $J$  = 3.8 Hz, 1H, H-3, pyrrole), 5.41 (d,  $J$  = 15.8 Hz, 1H, H<sub>b</sub>), 5.09 (d,  $J$  = 8.9 Hz, 1H, H<sub>a</sub>), 2.42 (s, 3H, CH<sub>3</sub>). <sup>13</sup>C NMR (100.6 MHz, CDCl<sub>3</sub>):  $\delta$  144.4, 139.0, 136.4, 135.9, 135.6, 134.1, 130.9, 130.7, 130.6, 130.4, 130.3 (2C), 129.8 (2C), 128.9 (3C), 128.8, 127.9 (2C), 127.4 (2C), 120.7, 115.7, 112.1, 109.4, 99.0, 91.1, 21.8.

*(E)*-2-(3-(Furan-2-yl)-4-tosylbut-3-en-1-yn-1-yl)-1-methyl-4,5,6,7-tetrahydro-1H-indole (**2h**).

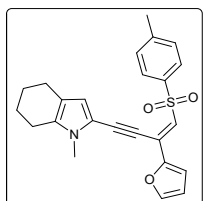

Yield 264 mg (65%), green crystals; m.p. 88-90°C. Anal. Calcd for C<sub>24</sub>H<sub>23</sub>NO<sub>3</sub>S: C, 71.09; H, 5.72; N, 3.45; S, 7.91%. Found: C, 70.96; H, 5.93; N, 3.64; S, 7.76%.  $\nu_{\max}$  (KBr) 3373, 3166, 3068, 2927, 2853, 2177, 1584, 1548, 1530, 1480, 1459, 1448, 1394, 1370, 1316, 1261, 1222, 1144, 1083, 1028, 914, 859, 836, 801, 745, 670, 652, 561, 532 cm<sup>-1</sup>. <sup>1</sup>H NMR (400.13 MHz, CDCl<sub>3</sub>):  $\delta$  7.93-7.91 (m, 2H, Ph), 7.45-7.42 (m, 1H, H-5, furan), 7.30-7.28 (m, 2H, Ph), 6.86 (s, 1H, =CH), 6.86-6.85 (m, 1H, H-5, H-3, furan), 6.48 (s, 1H, H-3, pyrrole), 6.47-6.46 (m, 1H, H-4, furan), 3.71 (s, 3H, N-CH<sub>3</sub>), 2.59-2.56 (m, 2H, CH<sub>2</sub>-7), 2.54-2.51 (m, 2H, CH<sub>2</sub>-4), 2.40 (s, 3H, CH<sub>3</sub>), 1.89-1.84 (m, 2H, CH<sub>2</sub>-5), 1.78-1.73 (m, 2H, CH<sub>2</sub>-6). <sup>13</sup>C NMR (100.6 MHz, CDCl<sub>3</sub>): 150.5, 145.0, 144.1, 139.6, 134.3, 129.8 (2C), 127.5 (2C), 124.3, 123.4, 119.3, 116.5, 114.6, 112.6 (2C), 97.4, 88.2, 31.4, 23.5, 23.1, 23.0, 22.6, 21.7.

*1*-Octyl-2-(3-(thiophen-2-yl)-4-tosylbut-3-en-1-yn-1-yl)-4,5,6,7-tetrahydro-1H-indole (**2i**), *E/Z* = 10:1.

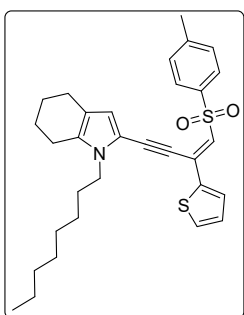

Yield 353 mg (68%), yellow crystals; m.p. 110-112°C. Anal. Calcd for C<sub>31</sub>H<sub>37</sub>NO<sub>2</sub>S<sub>2</sub>: C, 71.64; H, 7.18; N, 2.69; S, 12.34%. Found: C, 71.77; H, 7.28; N, 2.81; S, 12.15%.  $\nu_{\max}$  (KBr) 3101, 3058, 2926, 2853, 2171, 1596, 1568, 1543, 1497, 1464, 1420, 1392, 1314, 1291, 1233, 1202, 1145, 1084, 1057, 836, 911, 740, 706, 656, 554, 535, 464 cm<sup>-1</sup>. <sup>1</sup>H NMR (400.13 MHz, CDCl<sub>3</sub>): 7.95-7.93 (m, 2H, Ph), 7.47-7.46 (m, 1H, H-5, thiophene), 7.39-7.38 (m, 1H, H-3, thiophene), 7.31-7.29 (m, 2H, Ph), 7.04 (dd,  $J$  = 4.9, 3.8 Hz, 1H, H-4, thiophene), 6.76 (s, 1H, =CH), 6.56 (s, 1H, H-3, pyrrole), 4.06-4.02 (m, 2H, NCH<sub>2</sub>), 2.61-2.58 (m, 2H, CH<sub>2</sub>-7), 2.56-2.53 (m, 2H, CH<sub>2</sub>-4), 2.41 (s, 3H, CH<sub>3</sub>), 1.89-1.84 (m, 2H, CH<sub>2</sub>-5), 1.80-1.70 (m, 4H, CH<sub>2</sub>-6, CH<sub>2</sub>), 1.31-1.21 (m, 10H, 5CH<sub>2</sub>), 0.84 (t,  $J$  = 6.8 Hz, 3H, CH<sub>3</sub>). <sup>13</sup>C NMR (100.6 MHz, CDCl<sub>3</sub>):  $\delta$  144.0, 140.8, 139.6, 133.8, 129.7 (2C), 129.4, 129.0, 128.6, 128.1, 127.6 (2C), 124.4, 119.5, 117.3, 111.9, 99.5, 90.1, 45.2, 31.9, 31.6, 29.5, 29.3, 26.8, 23.5, 23.1 (2C), 22.7 (2C), 21.7, 14.2.

*1-Benzyl-2-(3-phenyl-4-tosylbut-3-en-1-yn-1-yl)-4,5,6,7-tetrahydro-1H-indole (2j)*, E/Z = 6:1.

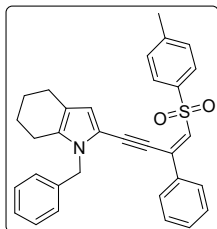

Yield 231 mg (47%), green crystals; m.p. 68-70°C. Anal. Calcd for C<sub>32</sub>H<sub>29</sub>NO<sub>2</sub>S: C, 78.18; H, 5.95; N, 2.85; S, 6.52%. Found: C, 78.41; H, 6.29; N, 3.03; S, 6.38%.  $\nu_{\max}$  (KBr) 3086, 3061, 3031, 2924, 2852, 2168, 1654, 1595, 1546, 1465, 1392, 1383, 1315, 1260, 1214, 1181, 1144, 1114, 1084, 1027, 911, 824, 809, 732, 697, 567, 538, 456 cm<sup>-1</sup>. <sup>1</sup>H NMR (400.13 MHz, CDCl<sub>3</sub>):  $\delta$  7.76-7.74 (m, 2H, Ph), 7.53-7.51 (m, 2H, Ph), 7.32-7.23 (m, 6H, Ph), 7.15-7.13 (m, 2H, Ph), 7.04-7.02 (m, 2H, Ph), 6.74 (s, 1H, =CH), 6.61 (s, 1H, H-3, pyrrole), 5.35 (s, 2H, CH<sub>2</sub>-Ph), 2.57-2.54 (m, 2H, CH<sub>2</sub>-7), 2.44-2.41 (m, 2H, CH<sub>2</sub>-4), 2.37 (s, 3H, CH<sub>3</sub>), 1.80-1.72 (m, 4H, CH<sub>2</sub>-5,6). <sup>13</sup>C NMR (100.6 MHz, CDCl<sub>3</sub>)  $\delta$  143.9, 139.1, 138.4, 136.3, 136.0, 134.4, 130.3, 129.7 (2C), 128.8 (2C), 128.7 (2C), 127.7, 127.6 (2C), 127.3 (2C), 127.2, 126.4 (2C), 120.1, 117.3, 113.0, 100.8, 91.1, 48.1, 23.4, 23.1, 22.9, 22.6, 21.7.

*(E)-1-Benzyl-2-(3-(furan-2-yl)-4-tosylbut-3-en-1-yn-1-yl)-4,5,6,7-tetrahydro-1H-indole (2k)*.

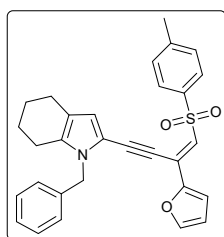

Yield 327 mg (68%), green crystals; m.p. 148-150°C. Anal. Calcd for C<sub>30</sub>H<sub>27</sub>NO<sub>3</sub>S: C, 74.82; H, 5.65; N, 2.91; S, 6.66 %. Found: C, 75.06; H, 5.80; N, 3.03; S, 6.54%.  $\nu_{\max}$  (KBr) 3130, 3064, 3031, 2928, 2852, 2179, 1583, 1538, 1490, 1457, 1396, 1380, 1316, 1303, 1220, 1145, 1115, 1084, 1036, 1014, 984, 917, 837, 813, 765, 732, 699, 652, 591, 562, 532 cm<sup>-1</sup>. <sup>1</sup>H NMR (400.13 MHz, CDCl<sub>3</sub>):  $\delta$  7.70 (m, 2H, Ph), 7.41-7.36 (m, 1H, H-5, furan), 7.32-7.23 (m, 3H, Ph), 7.12-7.10 (m, 2H, Ph), 7.07-7.05 (m, 2H, -Ph), 6.82 (s, 1H, =CH), 6.66-6.65 (m, 1H, H-3, furan), 6.58 (s, 1H, H-3, pyrrole), 6.42-6.39 (m, 1H, H-4, furan), 5.39 (s, 2H, CH<sub>2</sub>-Ph), 2.56-2.54 (m, 2H, CH<sub>2</sub>-7), 2.44-2.41 (m, 2H, CH<sub>2</sub>-4), 2.36 (s, 3H, CH<sub>3</sub>), 1.79-1.73 (m, 4H, CH<sub>2</sub>-5,6). <sup>13</sup>C NMR (100.6 MHz, CDCl<sub>3</sub>): 150.3, 144.9, 143.9, 139.4, 138.4, 134.3, 130.6, 129.7 (2C), 128.8 (2C), 127.5 (2C), 127.2, 126.5 (2C), 124.1, 123.4, 119.9, 117.1, 114.5, 112.5, 97.1, 88.1, 48.1, 23.4, 23.1, 23.0, 22.6, 21.7.

*(E)-1-Benzyl-2-(3-(thiophen-2-yl)-4-tosylbut-3-en-1-yn-1-yl)-4,5,6,7-tetrahydro-1H-indole (2l)*.

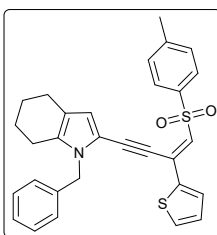

Yield 314 mg (63%), green crystals; m.p. 93-95°C. Anal. Calcd for C<sub>30</sub>H<sub>27</sub>NO<sub>2</sub>S<sub>2</sub>: C, 72.40; H, 5.47; N, 2.81; S, 12.88%. Found: C, 72.53; H, 5.61; N, 2.95; S, 12.68; %.  $\nu_{\max}$  (KBr) 3154, 3063, 3034, 2924, 2852, 2254, 2172, 1634, 1597, 1546, 1572, 1546, 1463, 1418, 1393, 1359, 1309, 1296, 1235, 1144, 1083, 1024, 909, 957, 837, 808, 732, 653, 555, 461 cm<sup>-1</sup>. <sup>1</sup>H NMR (400.13 MHz, CDCl<sub>3</sub>):  $\delta$  7.73-7.71 (m, 2H, Ph), 7.33-7.24 (m, 5H, Ph, H-3,5-thiophene), 7.14-7.12 (m, 2H, Ph), 7.06-7.05 (m, 2H, Ph), 6.97-6.94 (m, 1H, H-4, thiophene), 6.71 (s, 1H, =CH), 6.63 (s, 1H, H-3, pyrrole), 5.38 (s, 2H, CH<sub>2</sub>-Ph), 5.87-2.55 (m, 2H, CH<sub>2</sub>-7), 2.44-2.41 (m, 2H, CH<sub>2</sub>-4), 2.36 (s, 3H, CH<sub>3</sub>), 1.79-1.72 (m, 4H, CH<sub>2</sub>-5,6). <sup>13</sup>C NMR (100.6 MHz, CDCl<sub>3</sub>): 143.9, 140.6, 139.3, 138.3, 134.6, 129.7 (2C), 129.2, 129.0, 128.9, 128.8 (2C), 128.1, 127.5 (2C), 127.2, 126.5 (2C), 124.4, 120.1, 117.5, 112.8, 99.0, 90.1, 48.2, 23.4, 23.1, 22.9, 22.6, 21.7.

*(E)*-2-(3-Phenyl-4-tosylbut-3-en-1-yn-1-yl)-1-vinyl-4,5,6,7-tetrahydro-1H-indole (**2m**).

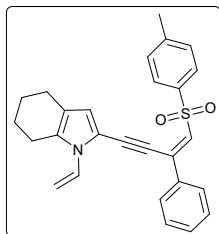

Yield 171 mg (40%), green crystals; m.p. 116-118°C. Anal. Calcd for C<sub>27</sub>H<sub>25</sub>NO<sub>2</sub>S: C, 75.85; H, 5.89; N, 3.28; S, 7.50%. Found: C, 76.02; H, 6.08; N, 3.41; S, 7.34 %.  $\nu_{\max}$  (KBr) 3059, 2931, 2851, 2171, 1643, 1595, 1586, 1570, 1548, 1478, 1442, 1384, 1360, 1317, 1298, 1218, 1203, 1184, 1145, 1084, 1018, 1004, 910, 870, 840, 811, 733, 694, 664, 645, 566, 539, 465 cm<sup>-1</sup>. <sup>1</sup>H NMR (400.13 MHz, CDCl<sub>3</sub>):  $\delta$  7.96-7.94 (m, 2H, Ph), 7.64-7.63 (m, 2H, Ph), 7.40-7.36 (m, 3H, Ph, H<sub>x</sub>), 7.31-7.26 (m, 3H, Ph), 6.85 (s, 1H, =CH), 6.59 (s, 1H, H-3, pyrrole), 5.32 (d, *J* = 16.8 Hz, 1H, H<sub>b</sub>), 4.93 (d, *J* = 10.0 Hz, 1H, H<sub>a</sub>), 2.75-2.72 (m, 2H, CH<sub>2</sub>-7), 2.55-2.52 (m, 2H, CH<sub>2</sub>-4), 2.41 (s, 3H, CH<sub>3</sub>), 1.88-1.83 (m, 2H, CH<sub>2</sub>-5), 1.79-1.74 (m, 2H, CH<sub>2</sub>-6). <sup>13</sup>C NMR (100.6 MHz, CDCl<sub>3</sub>):  $\delta$  144.2, 139.1, 136.1, 136.0, 133.5, 130.9, 130.5, 129.8 (2C), 128.9, 128.8 (2C), 127.8 (2C), 127.3 (2C), 121.4, 119.3, 112.5, 103.3, 100.2, 91.3, 24.6, 23.3, 23.1, 22.9, 21.7.

*(Z)*-(4-Tosylbut-3-en-1-yne-1,3-diyl)dibenzene (**2n**)

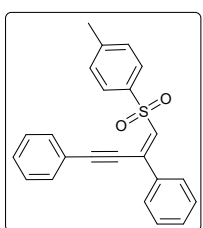

Yield 151 mg (42%), yellow crystals; m.p. 53-55°C. Anal. Calcd for C<sub>23</sub>H<sub>18</sub>O<sub>2</sub>S: C, 77.07; H, 5.06; S, 8.94%. Found: C, 77.21; H, 5.18; S, 8.77%.  $\nu_{\max}$  (KBr) 3058, 2923, 2853, 2187, 1659, 1596, 1552, 1490, 1445, 1319, 1145, 1085, 1025, 1006, 912, 843, 811, 755, 733, 692, 664, 642, 562, 530 cm<sup>-1</sup>. <sup>1</sup>H NMR (400.13 MHz, CDCl<sub>3</sub>): 7.96-7.94 (m, 2H, Ph), 7.71-7.69 (m, 2H, Ph), 7.64-7.62 (m, 2H, Ph), 7.46-7.40 (m, 6H, Ph), 7.30-7.28 (m, 2H, Ph), 7.11 (s, 1H, =CH), 2.40 (s, 3H, CH<sub>3</sub>). <sup>13</sup>C NMR (100.6 MHz, CDCl<sub>3</sub>):  $\delta$  144.5, 138.7, 135.7, 135.6, 133.1, 132.3 (2C), 130.9, 130.0, 129.8 (2C), 129.0 (2C), 128.7 (2C), 128.2 (2C), 127.3 (2C), 122.1, 105.8, 84.2, 21.8.

*(E)*-2-(4-Phenyl-1-tosylbut-1-en-3-yn-2-yl)furan (**2o**)

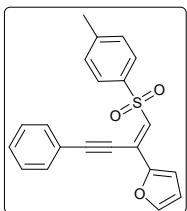

Yield 275 mg (79%), yellow crystals; m.p. 98-100°C. Anal. Calcd for C<sub>21</sub>H<sub>16</sub>O<sub>3</sub>S: C, 72.39; H, 4.63; S, 9.20%. Found: C, 72.57; H, 4.79; S, 9.05 %.  $\nu_{\max}$  (KBr) 3131, 3058, 2923, 2854, 2148, 1916, 1723, 1654, 1593, 1581, 1539, 1489, 1471, 1444, 1396, 1349, 1319, 1303, 1293, 1212, 1145, 1084, 1027, 1006, 920, 884, 836, 811, 801, 756, 690, 651, 590, 561, 531 cm<sup>-1</sup>. <sup>1</sup>H NMR (400.13 MHz, CDCl<sub>3</sub>):  $\delta$  7.94-7.92 (m, 2H, Ph), 7.64-7.62 (m, 2H, Ph), 7.46-7.42 (m, 4H, Ph, H-5, furan), 7.30-7.28 (m, 2H, Ph), 7.11 (s, 1H, =CH), 6.92-6.91 (m, 1H, H-3, furan), 6.49-6.48 (m, 1H, H-4, furan), 2.40 (s, 3H, CH<sub>3</sub>). <sup>13</sup>C NMR (100.6 MHz, CDCl<sub>3</sub>):  $\delta$  150.2, 145.4, 144.4, 139.0, 132.3 (2C), 130.0, 129.8 (2C), 128.7 (2C), 128.4, 128.0 (2C), 123.8, 121.9, 115.2, 112.7, 102.2, 81.7, 21.7.

#### 4. Scale reaction

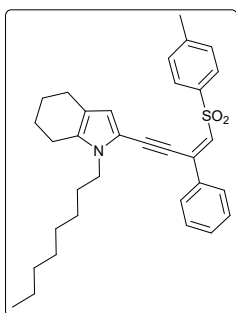

A solution of acylethynylpyrrole **1a** (1 g, 2.77 mmol) and TosMIC (1.08 g, 5.53 mmol) in THF (50 mL) was heated to reflux. Then, under reflux, solution of *t*-BuOK (621 mg, 5.53 mmol) in THF (20 mL) was added dropwise to reaction mixture for 1 hour. The residue, after removing solvent, was fractionated by column chromatography (SiO<sub>2</sub>, *n*-



hexane : diethyl ether, 5 : 1) to afford the 426 mg (59%) of (*Z*)-1-octyl-2-(3-phenyl-4-tosylbut-3-en-1-yn-1-yl)-4,5,6,7-tetrahydro-1*H*-indole **2a**.

## 5. The reaction of 4-(1-methyl-1*H*-pyrrol-2-yl)but-3-yn-2-one (**1p**) with TosMIC

A solution of 4-(1-methyl-1*H*-pyrrol-2-yl)but-3-yn-2-one **1p** (147 mg, 1 mmol) and TosMIC (395 mg, 2 mmol) in THF (10 mL) was stirred at 66°C. Then solution of *t*-BuOK (224 mg, 2 mmol) in THF (10 mL) was added dropwise to reaction mixture for 1 hour. The residue, after removing solvent, was fractionated by column chromatography (SiO<sub>2</sub>, n-hexane : diethyl ether, 2 : 1) to afford the 154 mg (45%) the mixture of isomers (*E*)-*N*-(2-methyl-4-(1-methyl-1*H*-pyrrol-2-yl)-1-tosylbut-1-en-3-yn-1-yl)formamide **3a** and (*Z*)-*N*-((*E*)-2-methyl-4-(1-methyl-1*H*-pyrrol-2-yl)-1-tosylbut-1-en-3-yn-1-yl)formimidic acid **3b** (**3a** : **3b** = 2 : 1).

(*E*)-*N*-(2-Methyl-4-(1-methyl-1*H*-pyrrol-2-yl)-1-tosylbut-1-en-3-yn-1-yl)formamide (**3a**)

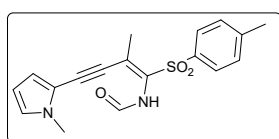

Yield 154 mg (45%), brown crystals; m.p. 130-132°C. Anal. Calcd for C<sub>18</sub>H<sub>18</sub>N<sub>2</sub>O<sub>3</sub>S: C, 63.14; H, 5.30; N, 8.18; S, 9.36%. Found: C, 63.32; H, 5.41; N, 8.38; S, 9.25%.  $\nu_{\max}$  (KBr) 3302, 3130, 2924, 2856, 2181, 1700, 1597, 1525, 1476,

1420, 1370, 1324, 1305, 1259, 1215, 1146, 1086, 1055, 1019, 1000, 912, 845, 814, 731, 679, 647, 598, 582, 568, 529, 468 cm<sup>-1</sup>. <sup>1</sup>H NMR (400.13 MHz, CDCl<sub>3</sub>):  $\delta$  8.15 (s, 1H, CHO), 7.85-7.83 (m, 2H, Ph), 7.47 (br.s, 1H, NH), 7.29-7.27 (m, 2H, Ph), 6.77-6.73 (m, 1H, H5-pyrrole), 6.60-6.58 (m, 1H, H3-pyrrole), 6.17-6.15 (m, 1H, H4-pyrrole), 3.77 (s, 3H, NCH<sub>3</sub>), 2.39 (s, 3H, PhCH<sub>3</sub>), 2.06 (s, 3H, =CCH<sub>3</sub>). <sup>13</sup>C NMR (100.6 MHz, CDCl<sub>3</sub>):  $\delta$  158.1, 145.0, 136.8, 129.9 (2C), 129.5, 128.2, 127.8 (2C), 125.9, 118.0, 115.1, 109.3, 96.5, 91.3, 35.0, 23.1, 21.8.

(*Z*)-*N*-((*E*)-2-Methyl-4-(1-methyl-1*H*-pyrrol-2-yl)-1-tosylbut-1-en-3-yn-1-yl)formimidic acid (**3b**)

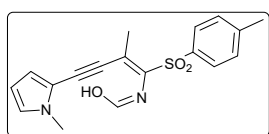

<sup>1</sup>H NMR (400.13 MHz, CDCl<sub>3</sub>): only some signals are visible. <sup>13</sup>C NMR (100.6 MHz, CDCl<sub>3</sub>):  $\delta$  163.9, 145.5, 136.0, 133.4, 131.4 (2C), 130.3 (2C), 128.5, 126.4, 118.6, 114.8, 109.5, 98.1, 91.1, 35.1, 22.8, 22.4.

## 6. The reaction of 1-(1-methyl-1*H*-pyrrol-2-yl)pent-1-yn-3-one (**1q**) with TosMIC

A solution of 1-(1-methyl-1*H*-pyrrol-2-yl)pent-1-yn-3-one **1q** (200 mg, 1 mmol) and TosMIC (395 mg, 2 mmol) in THF (10 mL) was heated to reflux. Then, under reflux, solution of *t*-BuOK (224 mg, 2 mmol) in THF (10 mL) was added dropwise to reaction mixture for 1 hour. The residue, after removing solvent, was fractionated by column chromatography (SiO<sub>2</sub>, n-hexane : diethyl ether, 2 : 1) to afford the 89 mg (32%) 4-tosyloxazole **4**. The 4-tosyloxazole **4** is a known substance.<sup>2</sup>

(2) Leusen, D. V.; Leusen, A. M. V., Synthetic Uses of Tosylmethyl Isocyanide (TosMIC). In *Org. React.*, John Wiley & Sons, Inc.2001; pp 417-666.

## 7. The reaction of 1-phenylpent-1-yn-3-one (**1r**) with TosMIC

A solution of 1-phenylpent-1-yn-3-one **1r** (158 mg, 1 mmol) and TosMIC (395 mg, 2 mmol) in THF (10 mL) was heated to reflux. Then, under reflux, solution of *t*-BuOK (224 mg, 2 mmol) in THF (10 mL) was added dropwise to reaction mixture for 1 hour. The residue, after removing solvent, was fractionated by column chromatography (SiO<sub>2</sub>, n-hexane : diethyl ether, 2 : 1) to afford the 234 mg (72%) (*E*)-2-ethyl-4-phenyl-3-tosylbut-3-enenitrile **6**.

### (*E*)-2-Ethyl-4-phenyl-3-tosylbut-3-enenitrile (**6**)

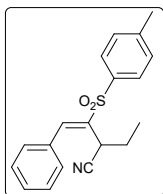

Yield 234 mg (72%), white crystals; m.p. 128-130°C. Anal. Calcd for C<sub>19</sub>H<sub>19</sub>NO<sub>2</sub>S: C, 70.13; H, 5.89; N, 4.30; S, 9.85%. Found: C, 70.25; H, 6.04; N, 4.44; S, 9.65%.  $\nu_{\max}$  (KBr) 3060, 2976, 2934, 2879, 2242, 1622, 1597, 1493, 1450, 1402, 1384, 1317, 1305, 1210, 1183, 1150, 1121, 1085, 1019, 1002, 944, 912, 814, 757, 733, 698, 670, 608, 560, 532, 473 cm<sup>-1</sup>. <sup>1</sup>H NMR (400.13 MHz, CDCl<sub>3</sub>):  $\delta$  8.09 (s, 1H, =CH), 7.87-7.85 (m, 2H, *o*-Ph), 7.48-7.38 (m, 7H, Ph), 3.81 (dd, *J* = 6.6, 9.5 Hz, 1H, CHCN), 2.46 (s, 3H, CH<sub>3</sub>), 2.06-1.98 (m, 1H, CH<sub>2</sub>), 1.80-1.73 (m, 1H, HCH), 0.95 (t, *J* = 7.4 Hz, 3H, CH<sub>3</sub>). <sup>13</sup>C NMR (100.6 MHz, CDCl<sub>3</sub>):  $\delta$  145.3, 143.0, 137.0, 136.2, 132.4, 130.3(2C), 130.2, 129.3 (2C), 129.2 (2C), 128.5 (2C), 118.2, 31.4, 25.2, 21.8, 12.2.

## 8. <sup>1</sup>H and <sup>13</sup>C NMR spectra:

<sup>1</sup>H NMR spectrum of 3-(1-octyl-4,5,6,7-tetrahydro-1*H*-indol-2-yl)-1-(thiophen-2-yl)prop-2-yn-1-one (**1a**) in CDCl<sub>3</sub>.

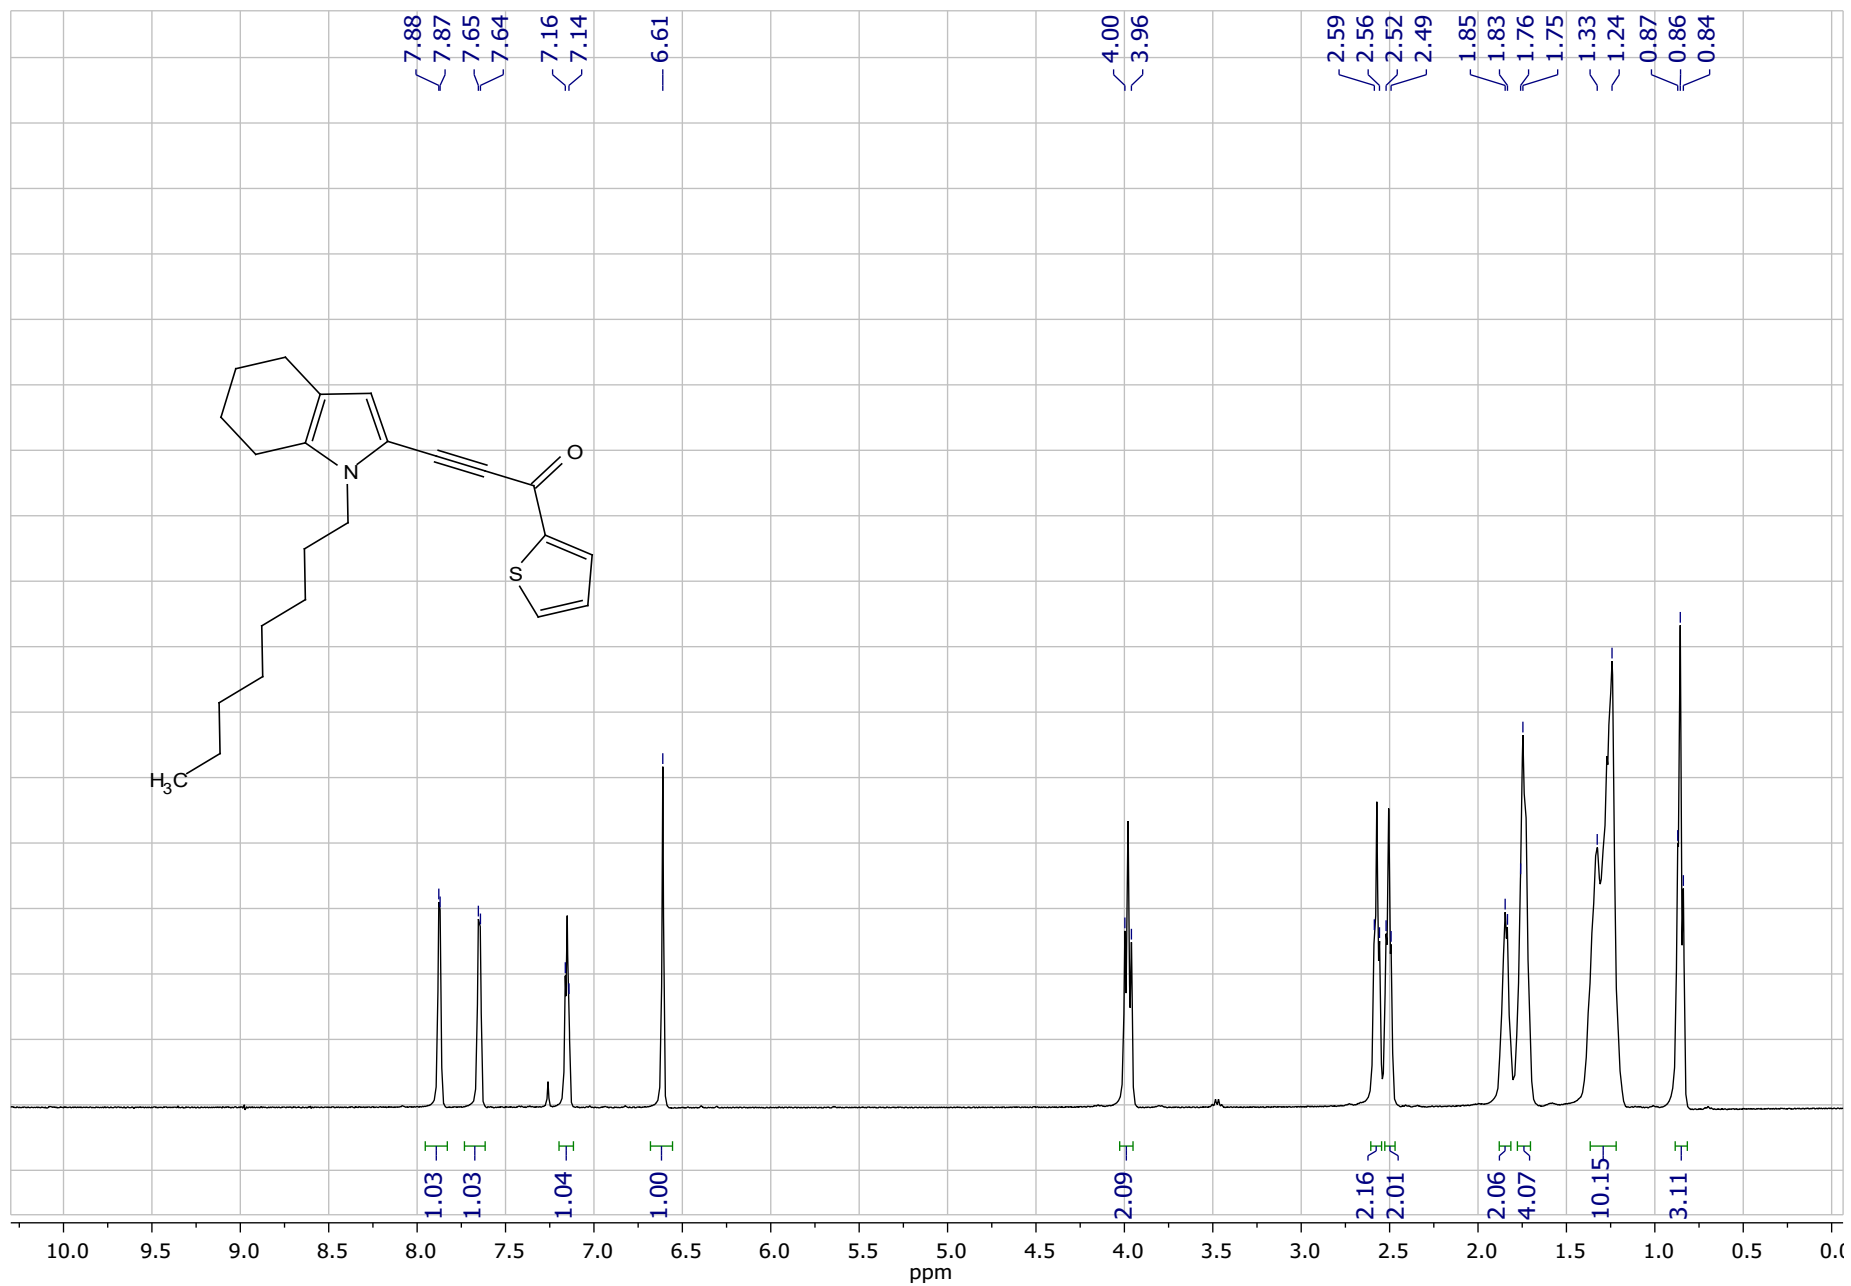

$^{13}\text{C}$  NMR spectrum of 3-(1-octyl-4,5,6,7-tetrahydro-1*H*-indol-2-yl)-1-(thiophen-2-yl)prop-2-yn-1-one (**1a**) in  $\text{CDCl}_3$ .

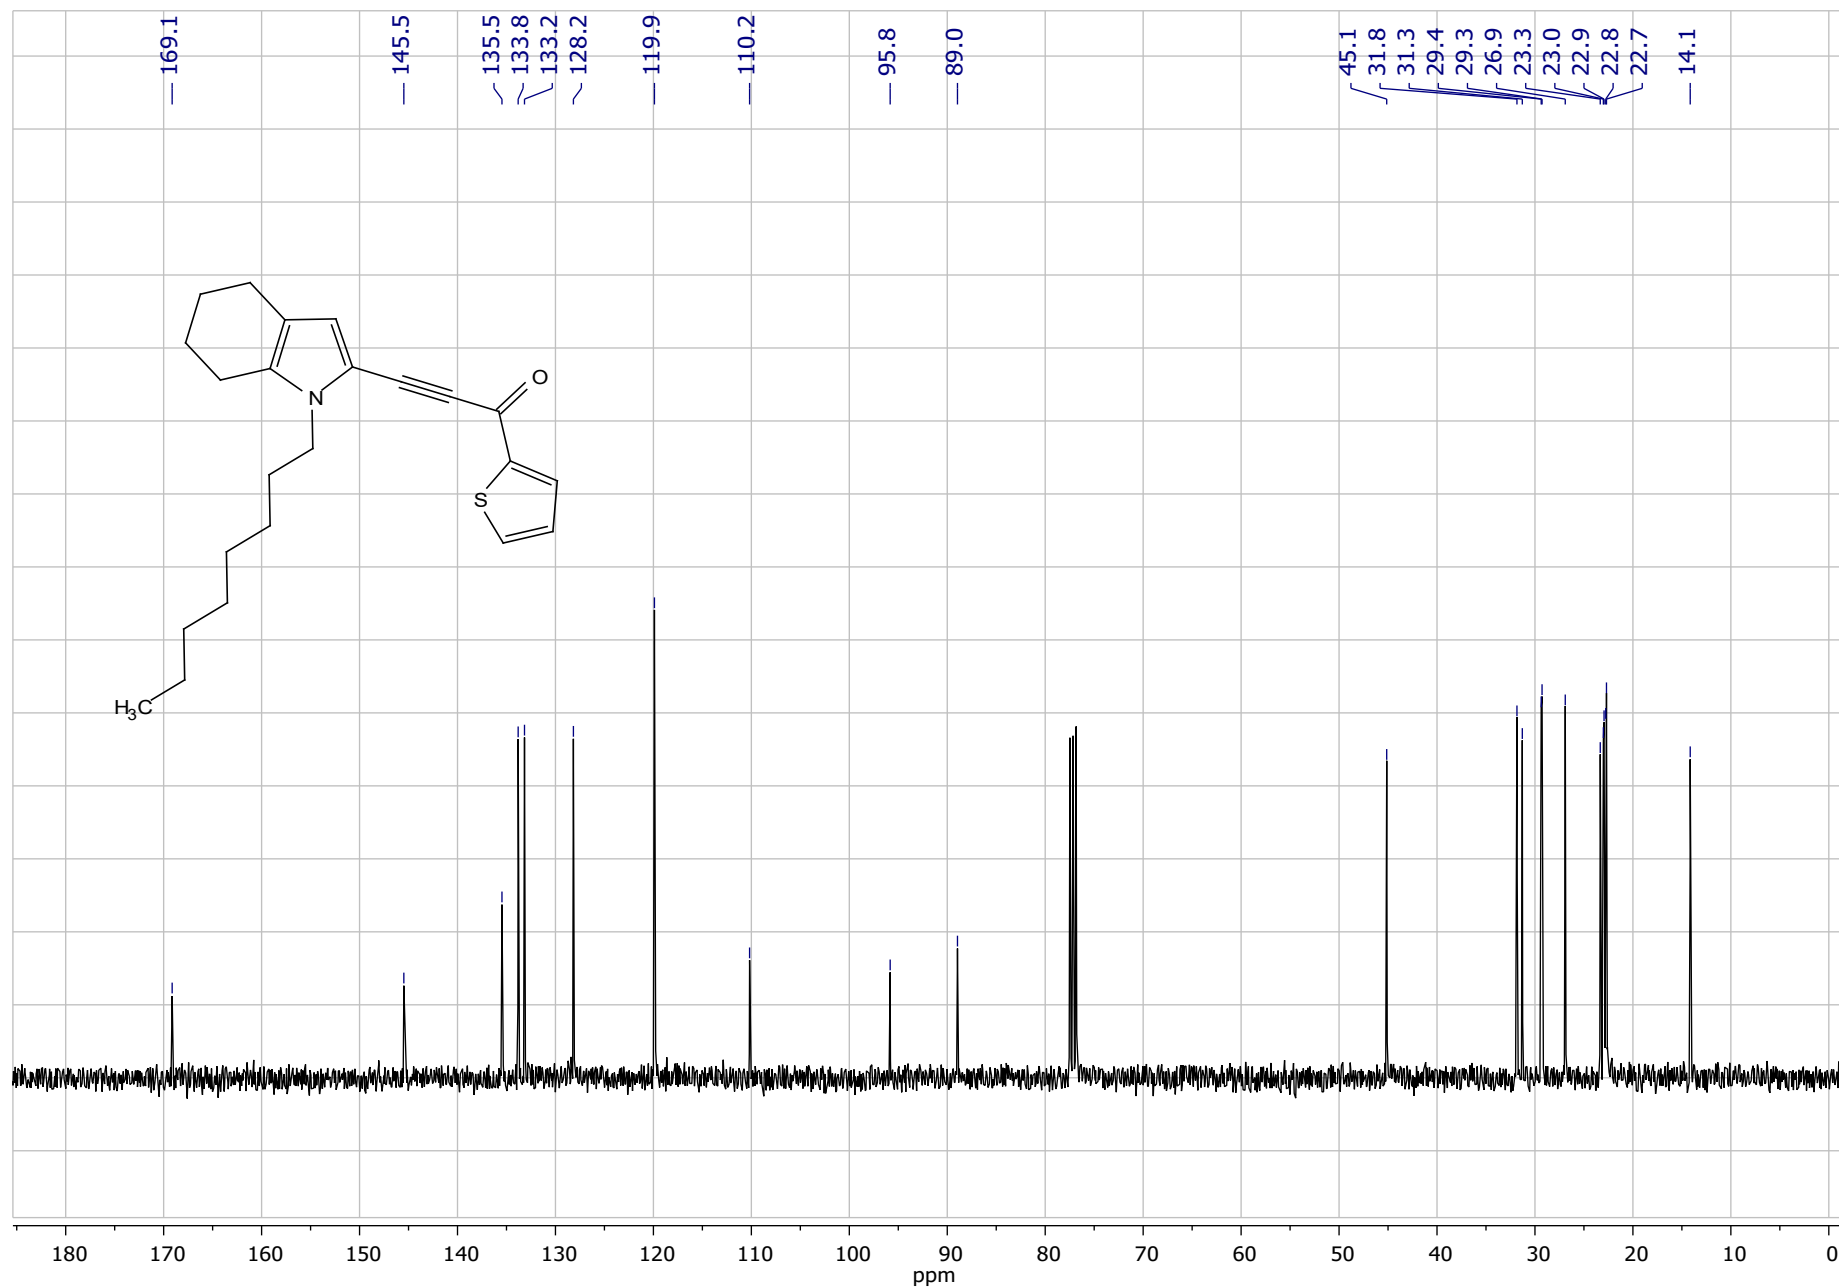

$^1\text{H}$  NMR spectrum of 1-(1-methyl-1*H*-pyrrol-2-yl)pent-1-yn-3-one (**1q**) in  $\text{CDCl}_3$ .

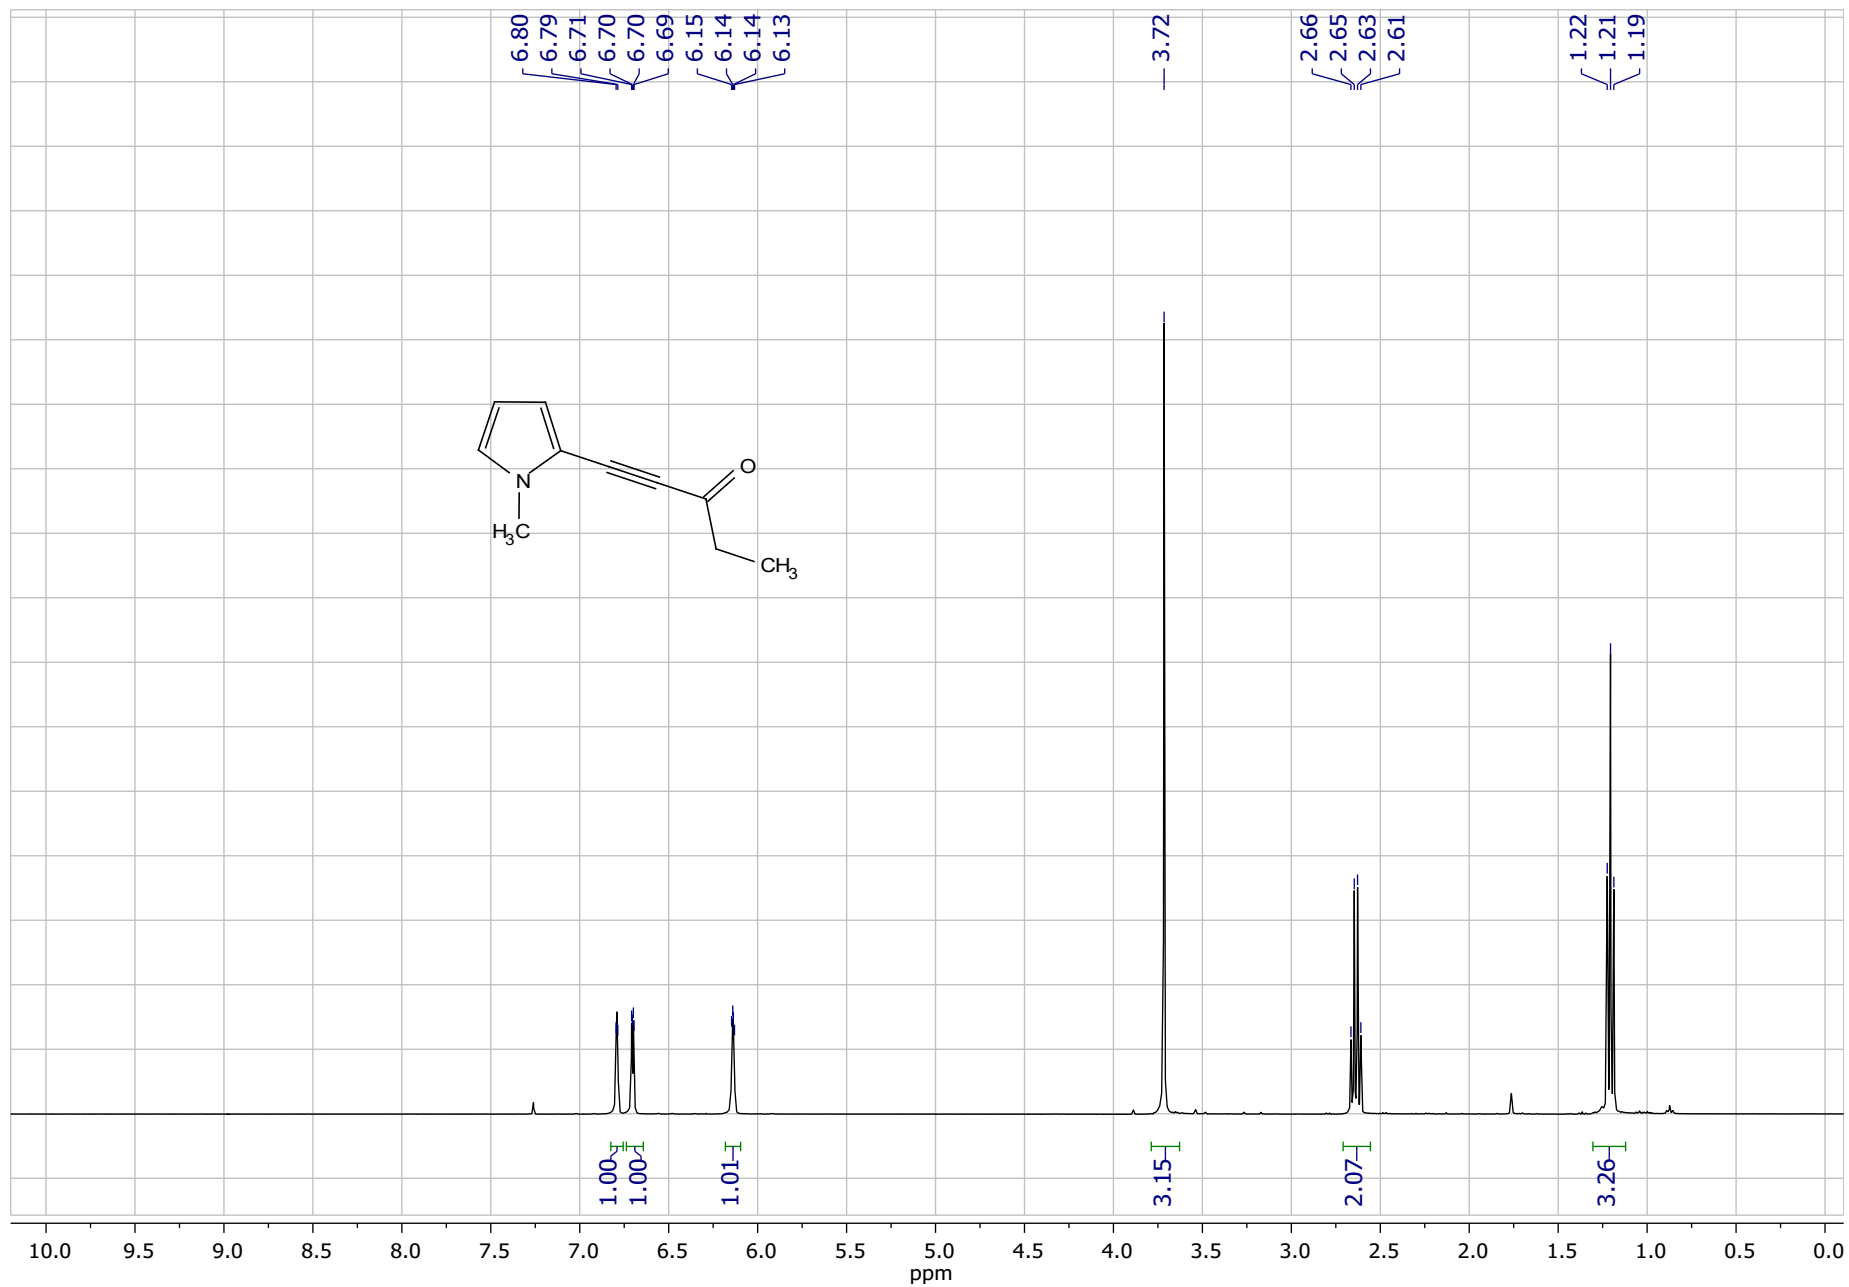

$^{13}\text{C}$  NMR spectrum of 1-(1-methyl-1*H*-pyrrol-2-yl)pent-1-yn-3-one (**1q**) in  $\text{CDCl}_3$ .

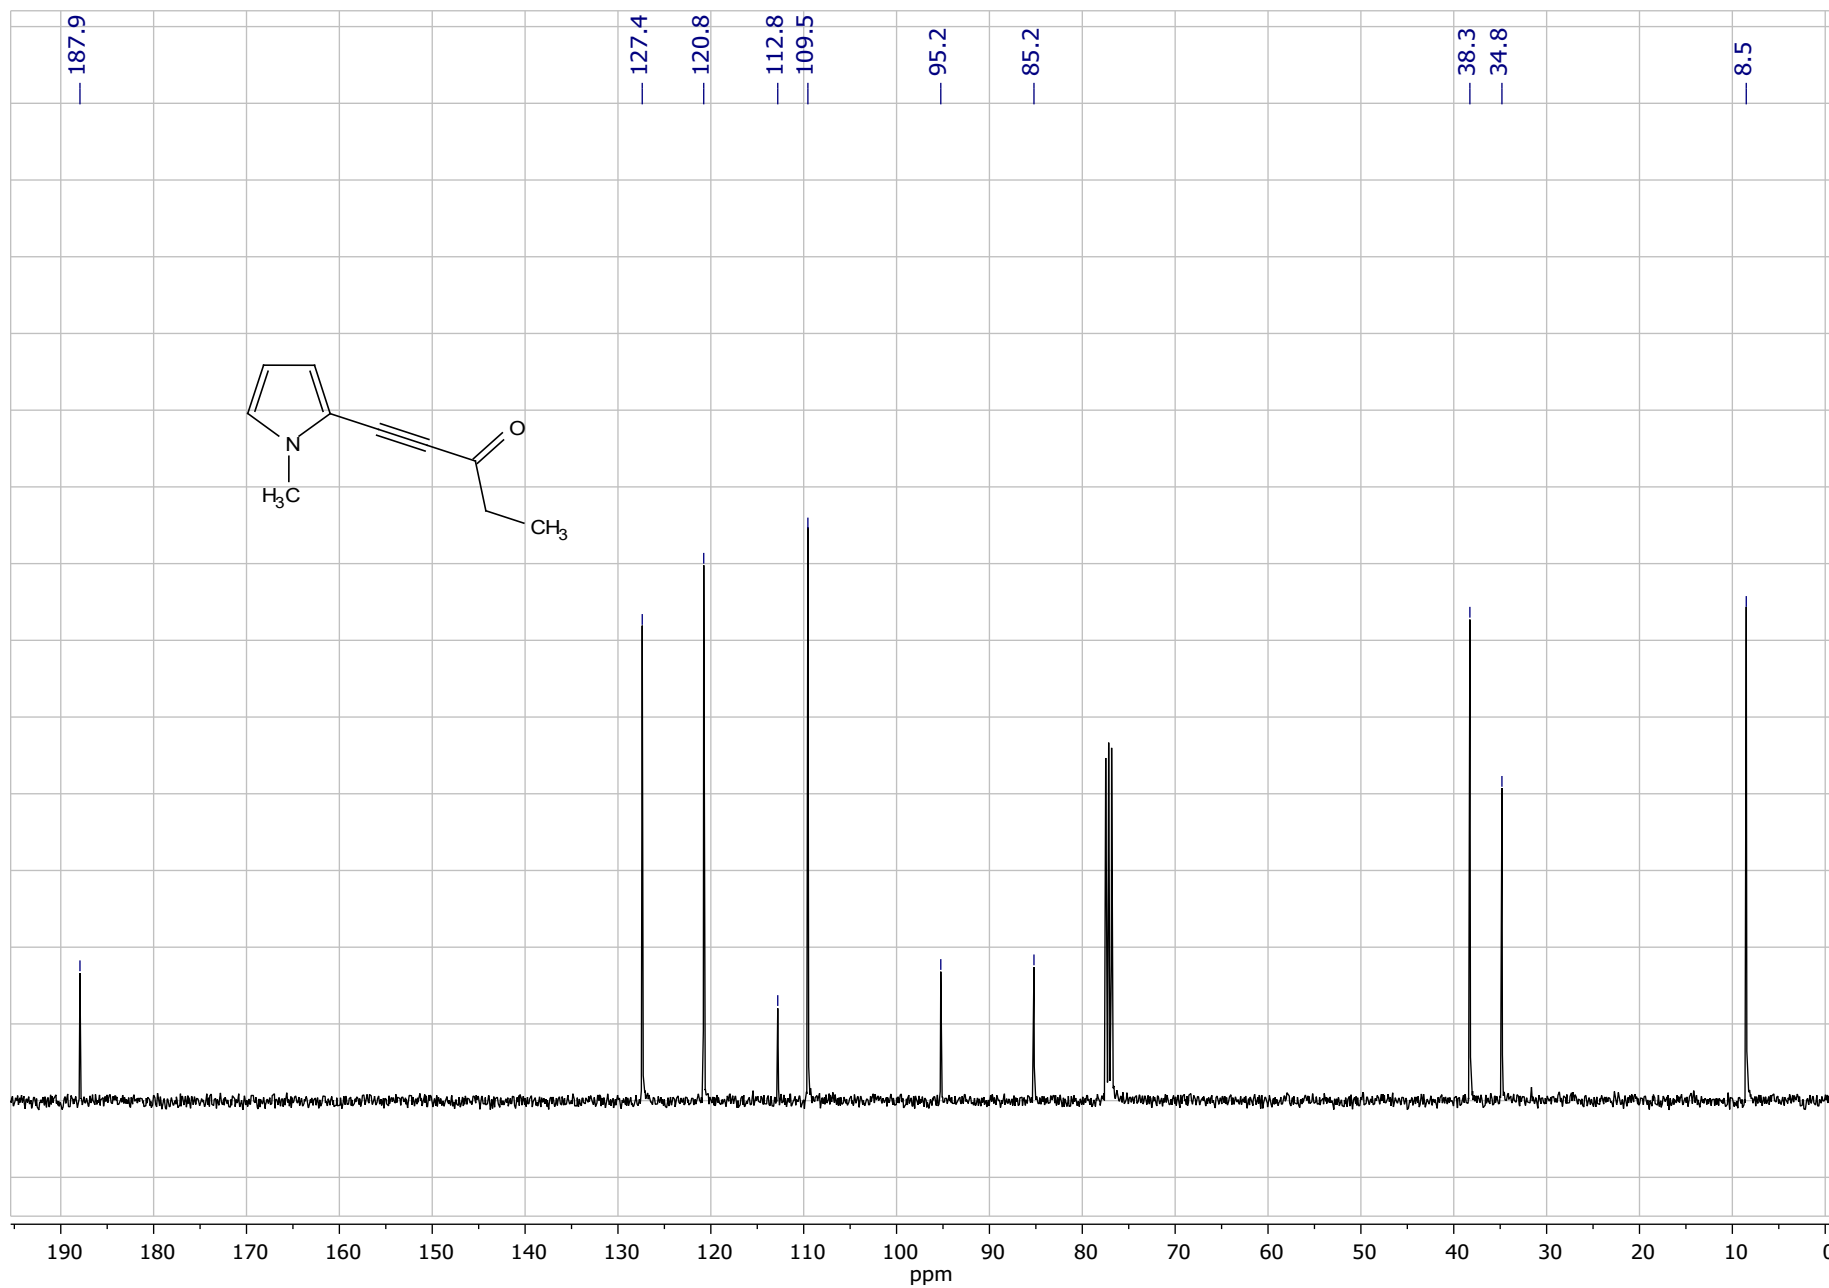

<sup>1</sup>H NMR spectrum of (*Z/E*)-1-octyl-2-(3-phenyl-4-tosylbut-3-en-1-yn-1-yl)-4,5,6,7-tetrahydro-1*H*-indole (**2a**) in CDCl<sub>3</sub>.

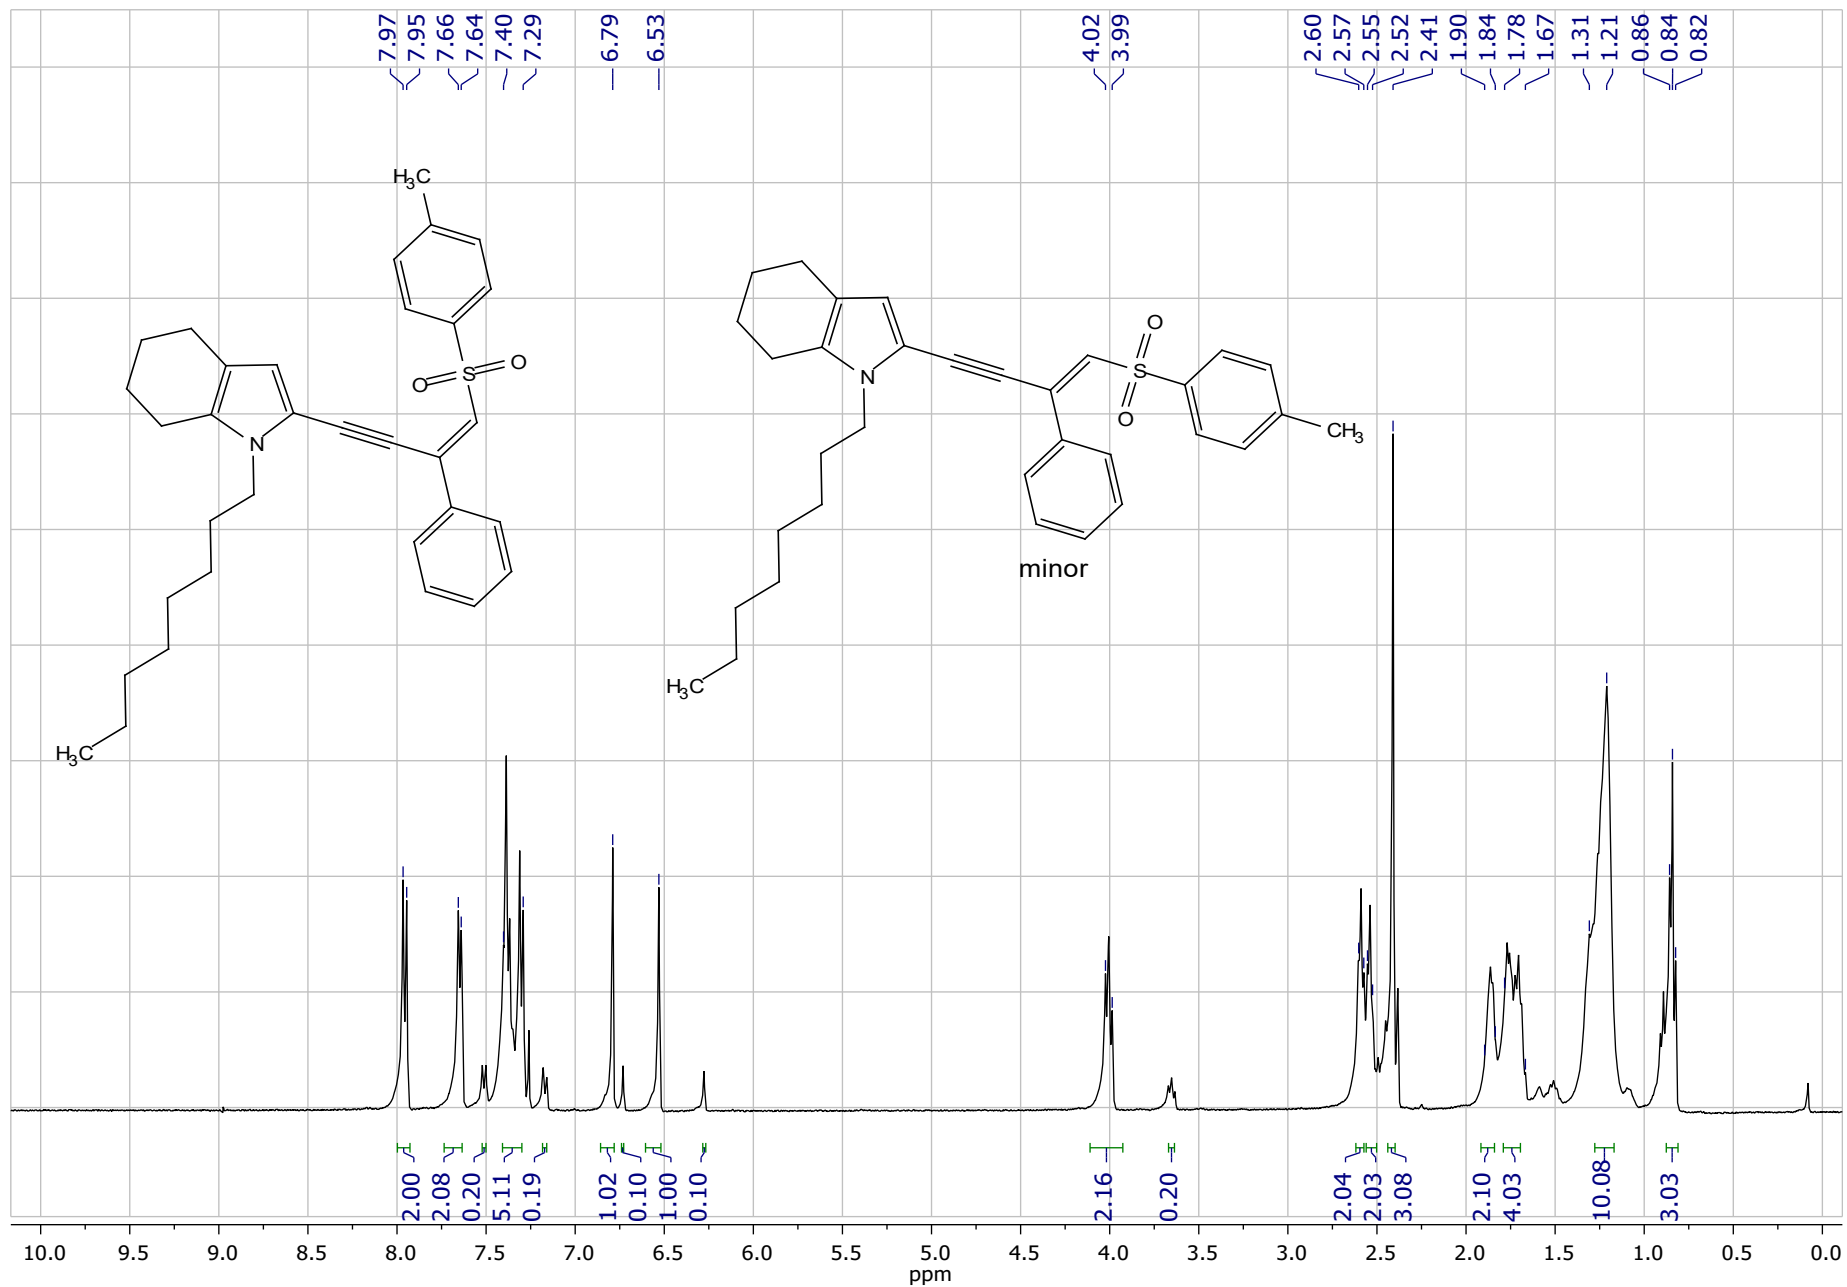

$^{13}\text{C}$  NMR spectrum of (*Z/E*)-1-octyl-2-(3-phenyl-4-tosylbut-3-en-1-yn-1-yl)-4,5,6,7-tetrahydro-1*H*-indole in  $\text{CDCl}_3$ . (**2a**)

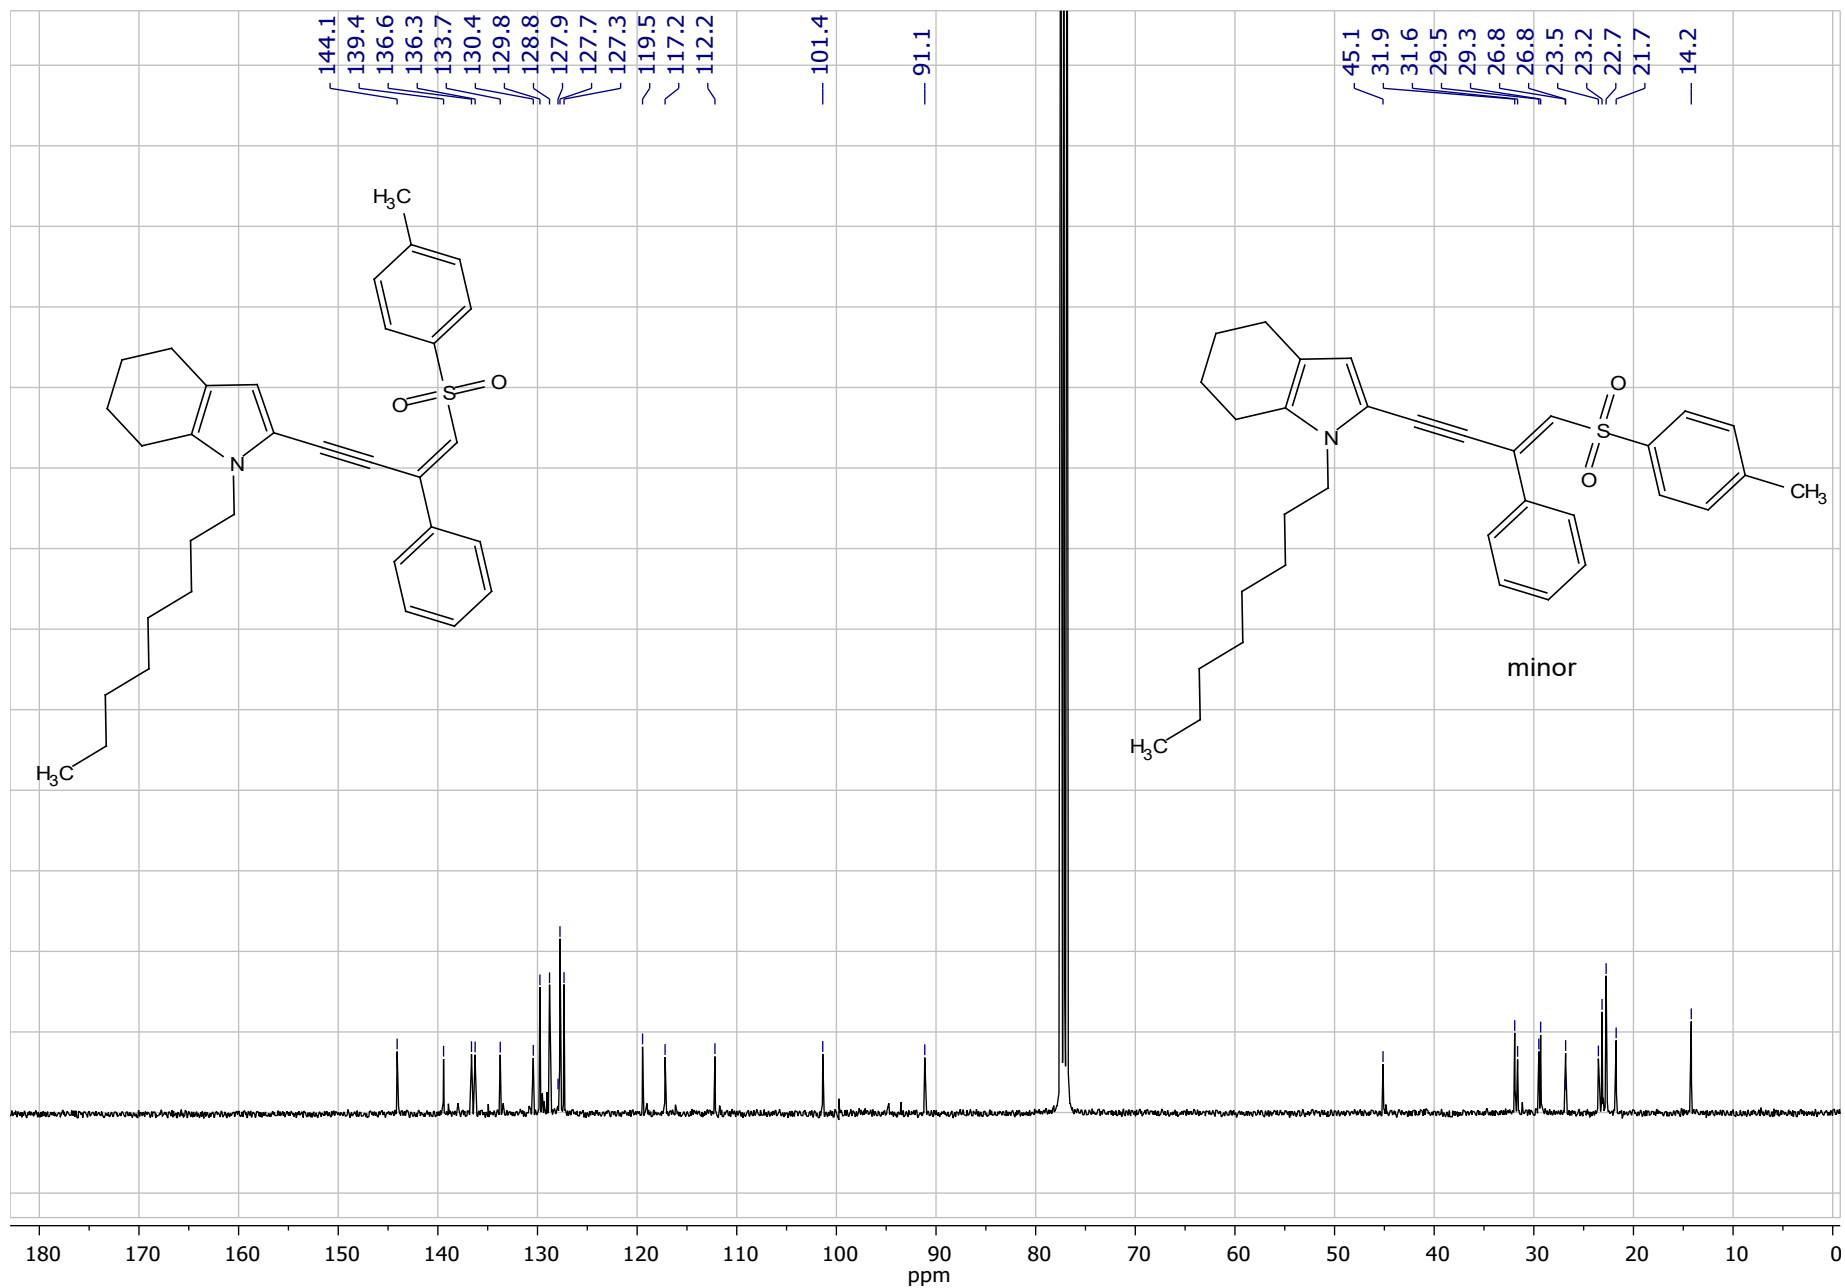



2D NMR Spectra of 1-octyl-2-(3-phenyl-4-tosylbut-3-en-1-yn-1-yl)-4,5,6,7-tetrahydro-1H-indole (**2a**) in CDCl<sub>3</sub>, E/Z = 10:1.

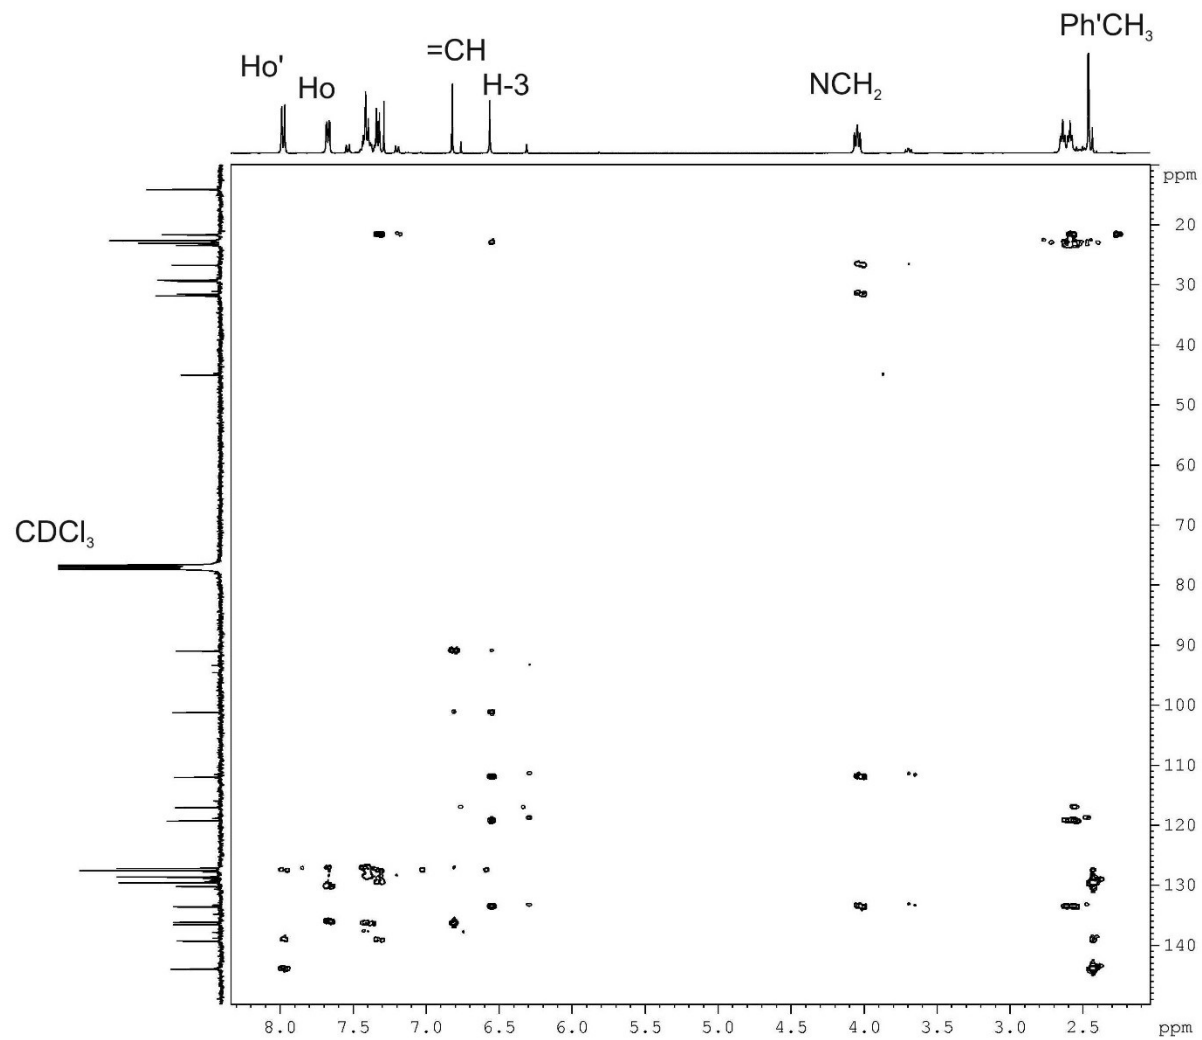

2D <sup>1</sup>H-<sup>13</sup>C HMBC spectrum of mixture *E*- and *Z*- isomers of **2a** (CDCl<sub>3</sub>), significant correlations observed in the spectrum are presented in the scheme below:

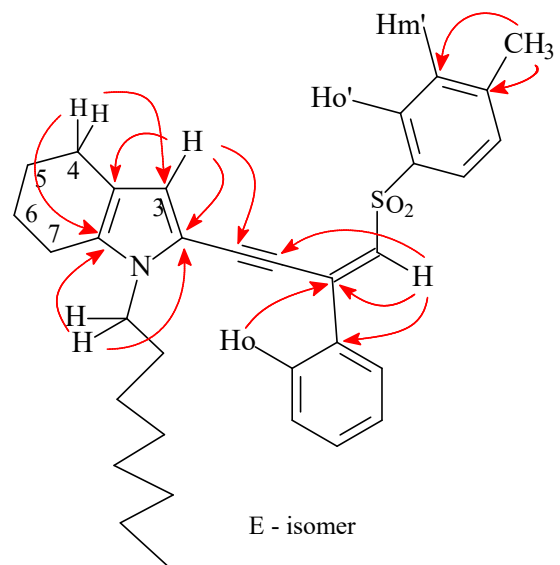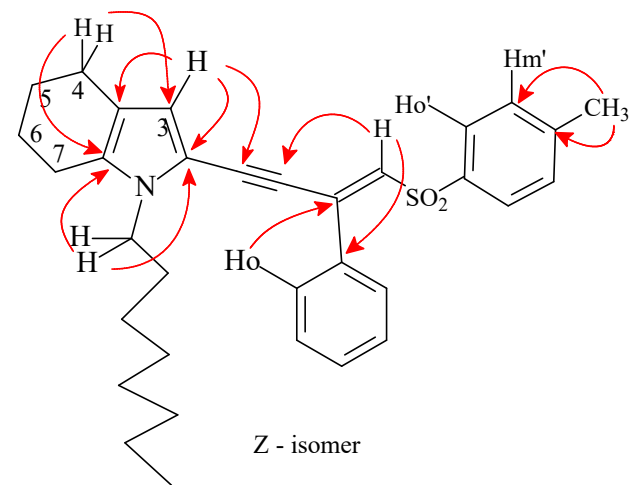

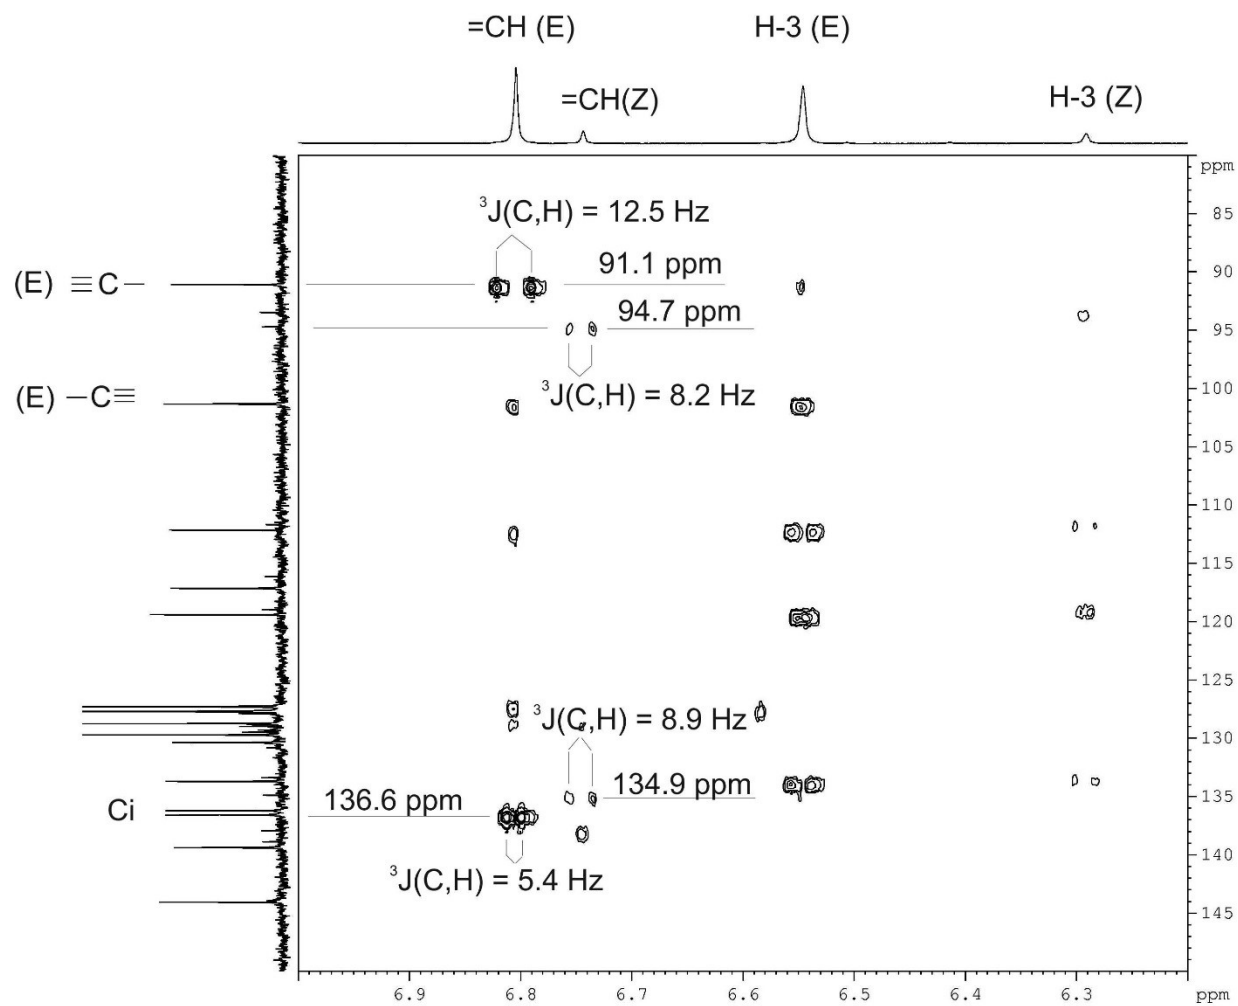

Fragment of 2D  ${}^1\text{H}$ - ${}^{13}\text{C}$  HMBC spectrum of mixture *E*- and *Z*- isomers of **2a** ( $\text{CDCl}_3$ ). The values of the vicinal spin spin coupling constants  ${}^3J(\text{C,H})$  were measured from the cross sections of the corresponding cross peaks.

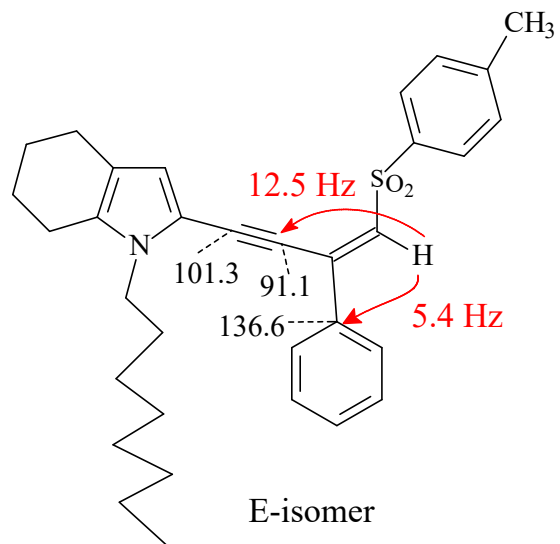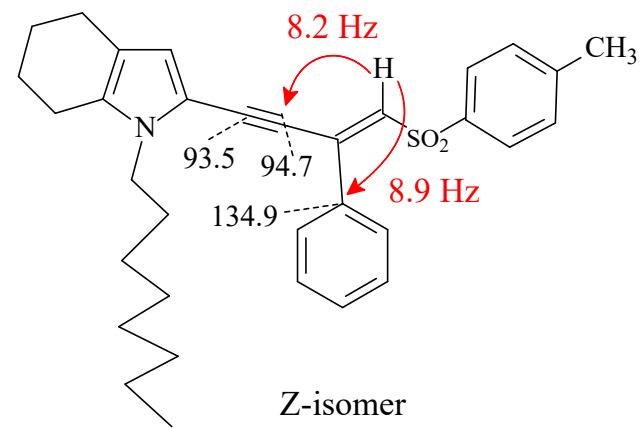

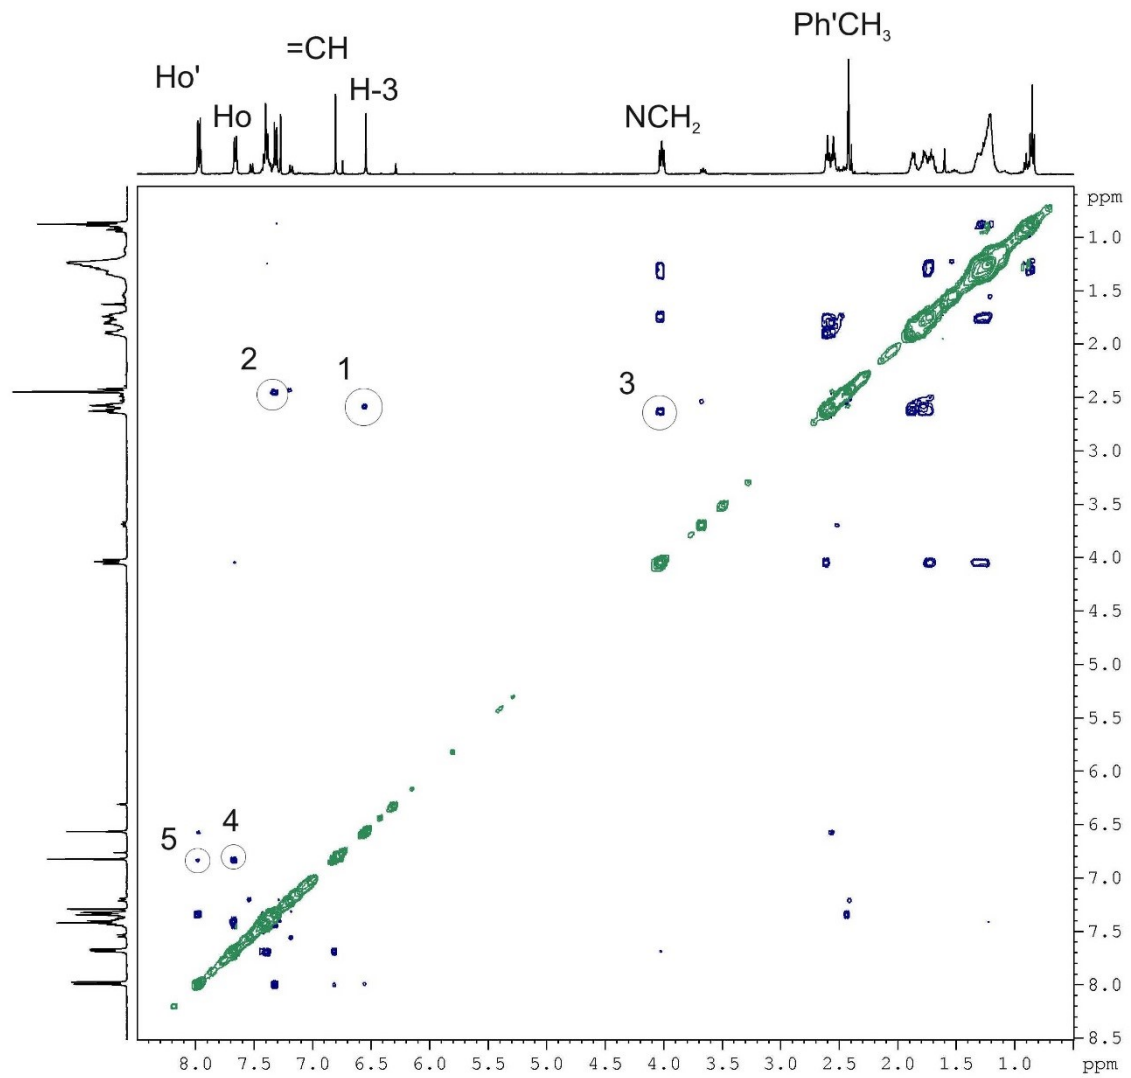

2D NOESY spectrum of mixture *E*- and *Z*- isomers of **2a** (400.1 MHz, CDCl<sub>3</sub>), significant correlations observed in the spectrum are presented in the scheme below:

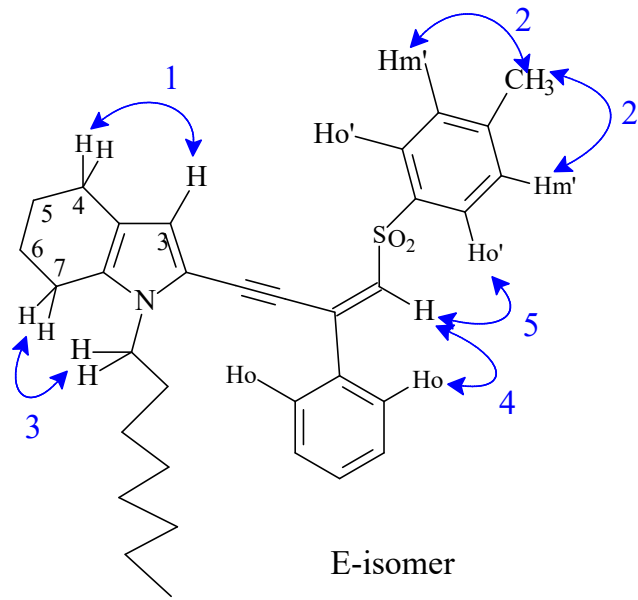

$^1\text{H}$  NMR spectrum of (*Z/E*)-1-methyl-2-(3-(thiophen-2-yl)-4-tosylbut-3-en-1-yn-1-yl)-1*H*-pyrrole (**2b**) in  $\text{CDCl}_3$ .

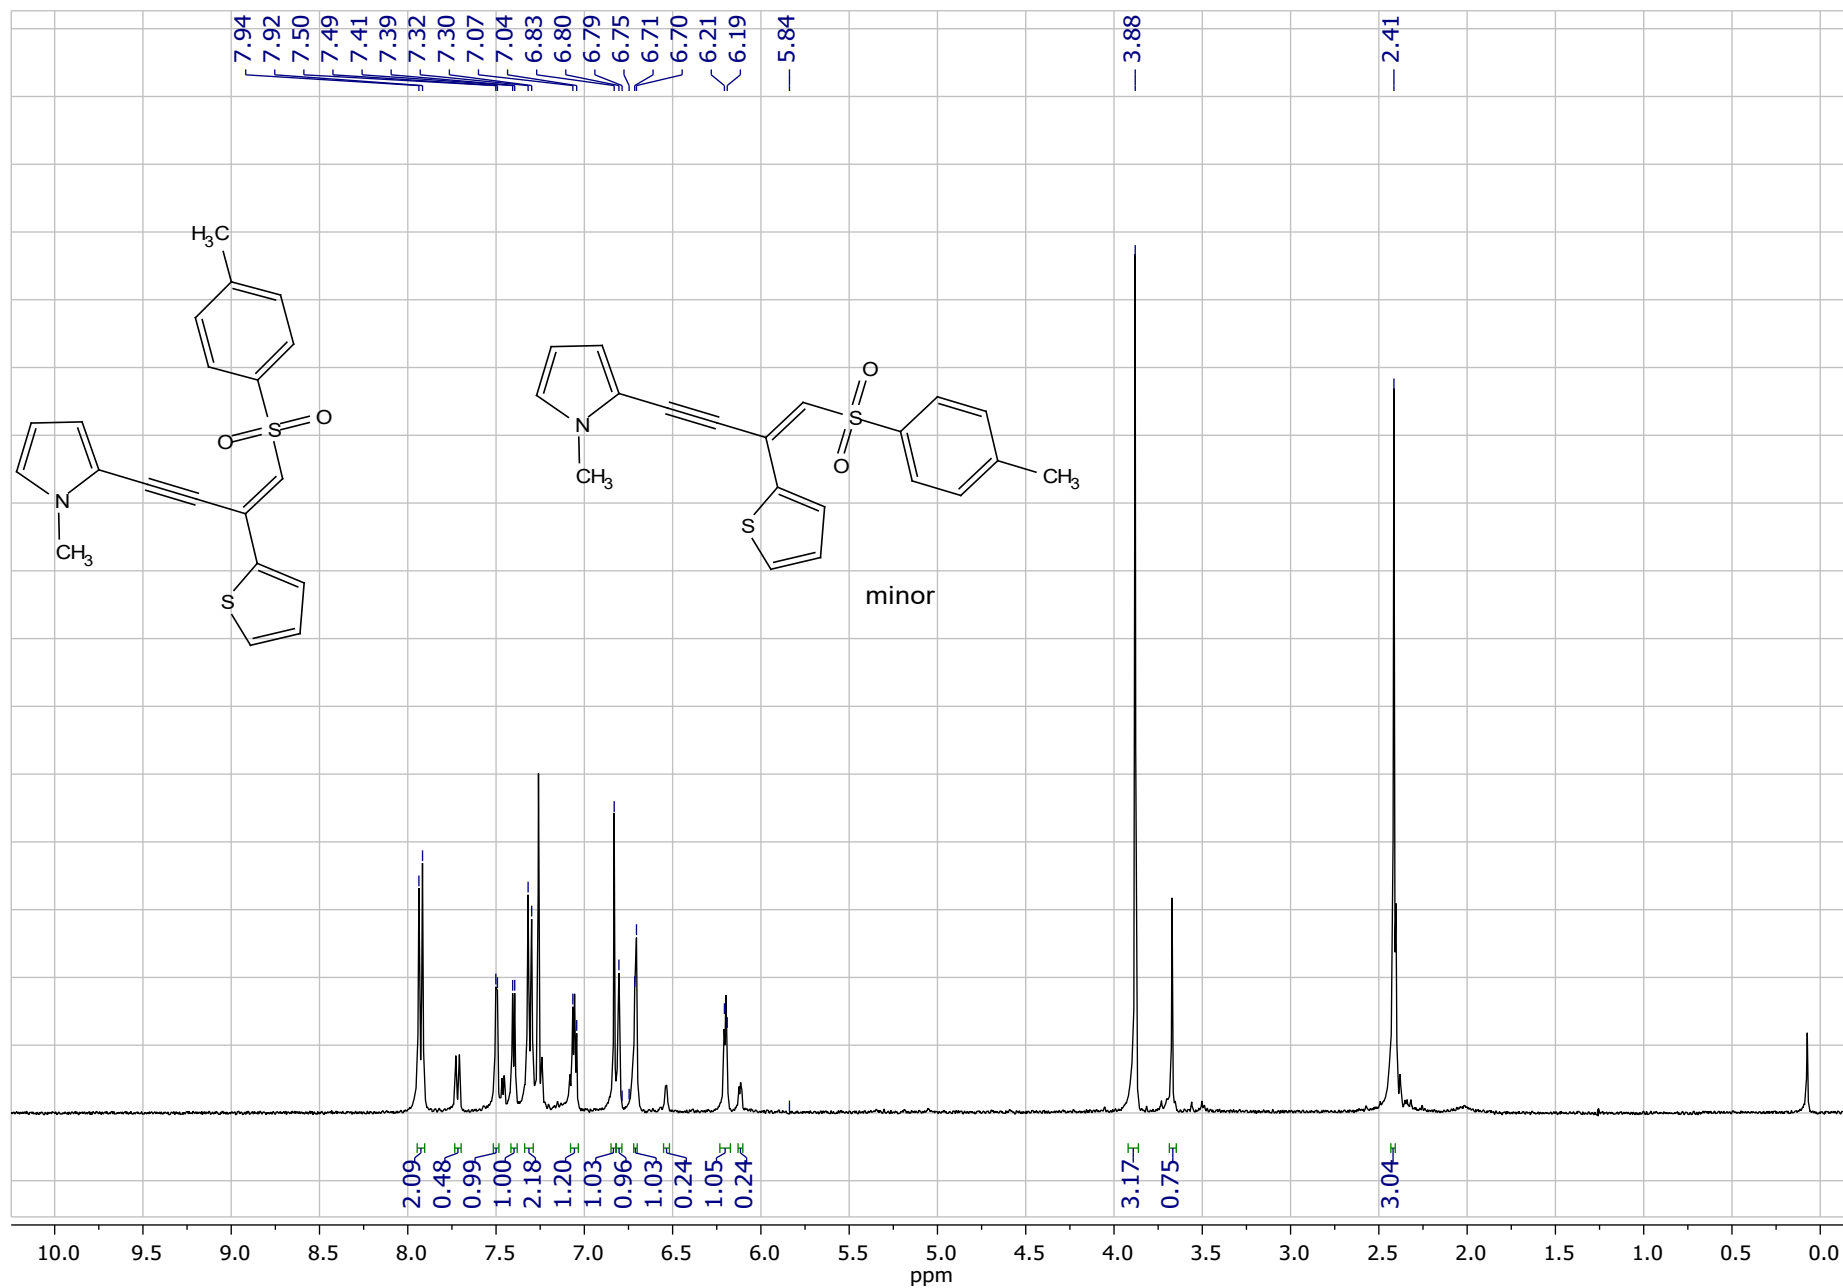

$^{13}\text{C}$  NMR spectrum of (*Z/E*)-1-methyl-2-(3-(thiophen-2-yl)-4-tosylbut-3-en-1-yn-1-yl)-1*H*-pyrrole (**2b**) in  $\text{CDCl}_3$ .

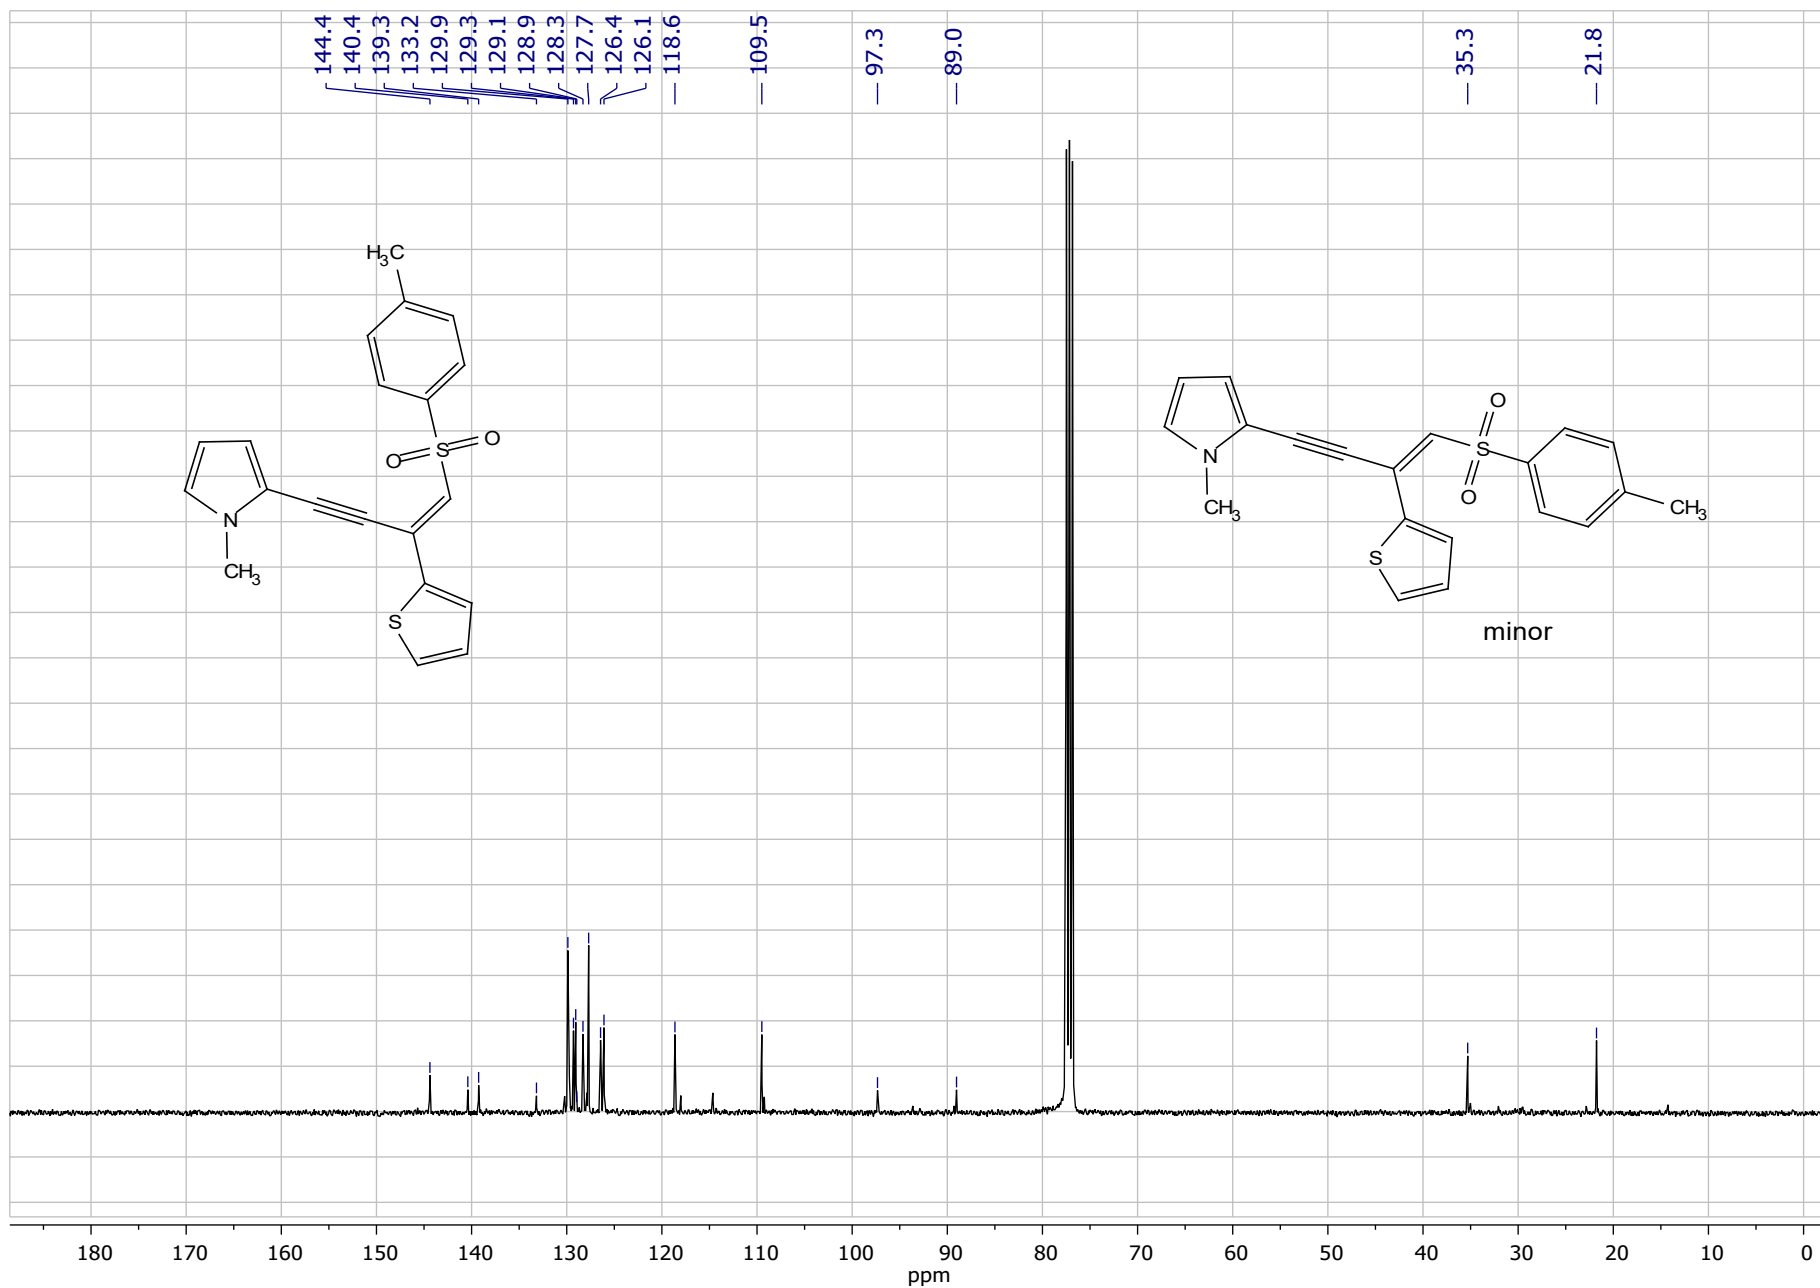



<sup>1</sup>H NMR spectrum of (*Z/E*)-1-benzyl-2-(3-phenyl-4-tosylbut-3-en-1-yn-1-yl)-1*H*-pyrrole (**2c**) in CDCl<sub>3</sub>.

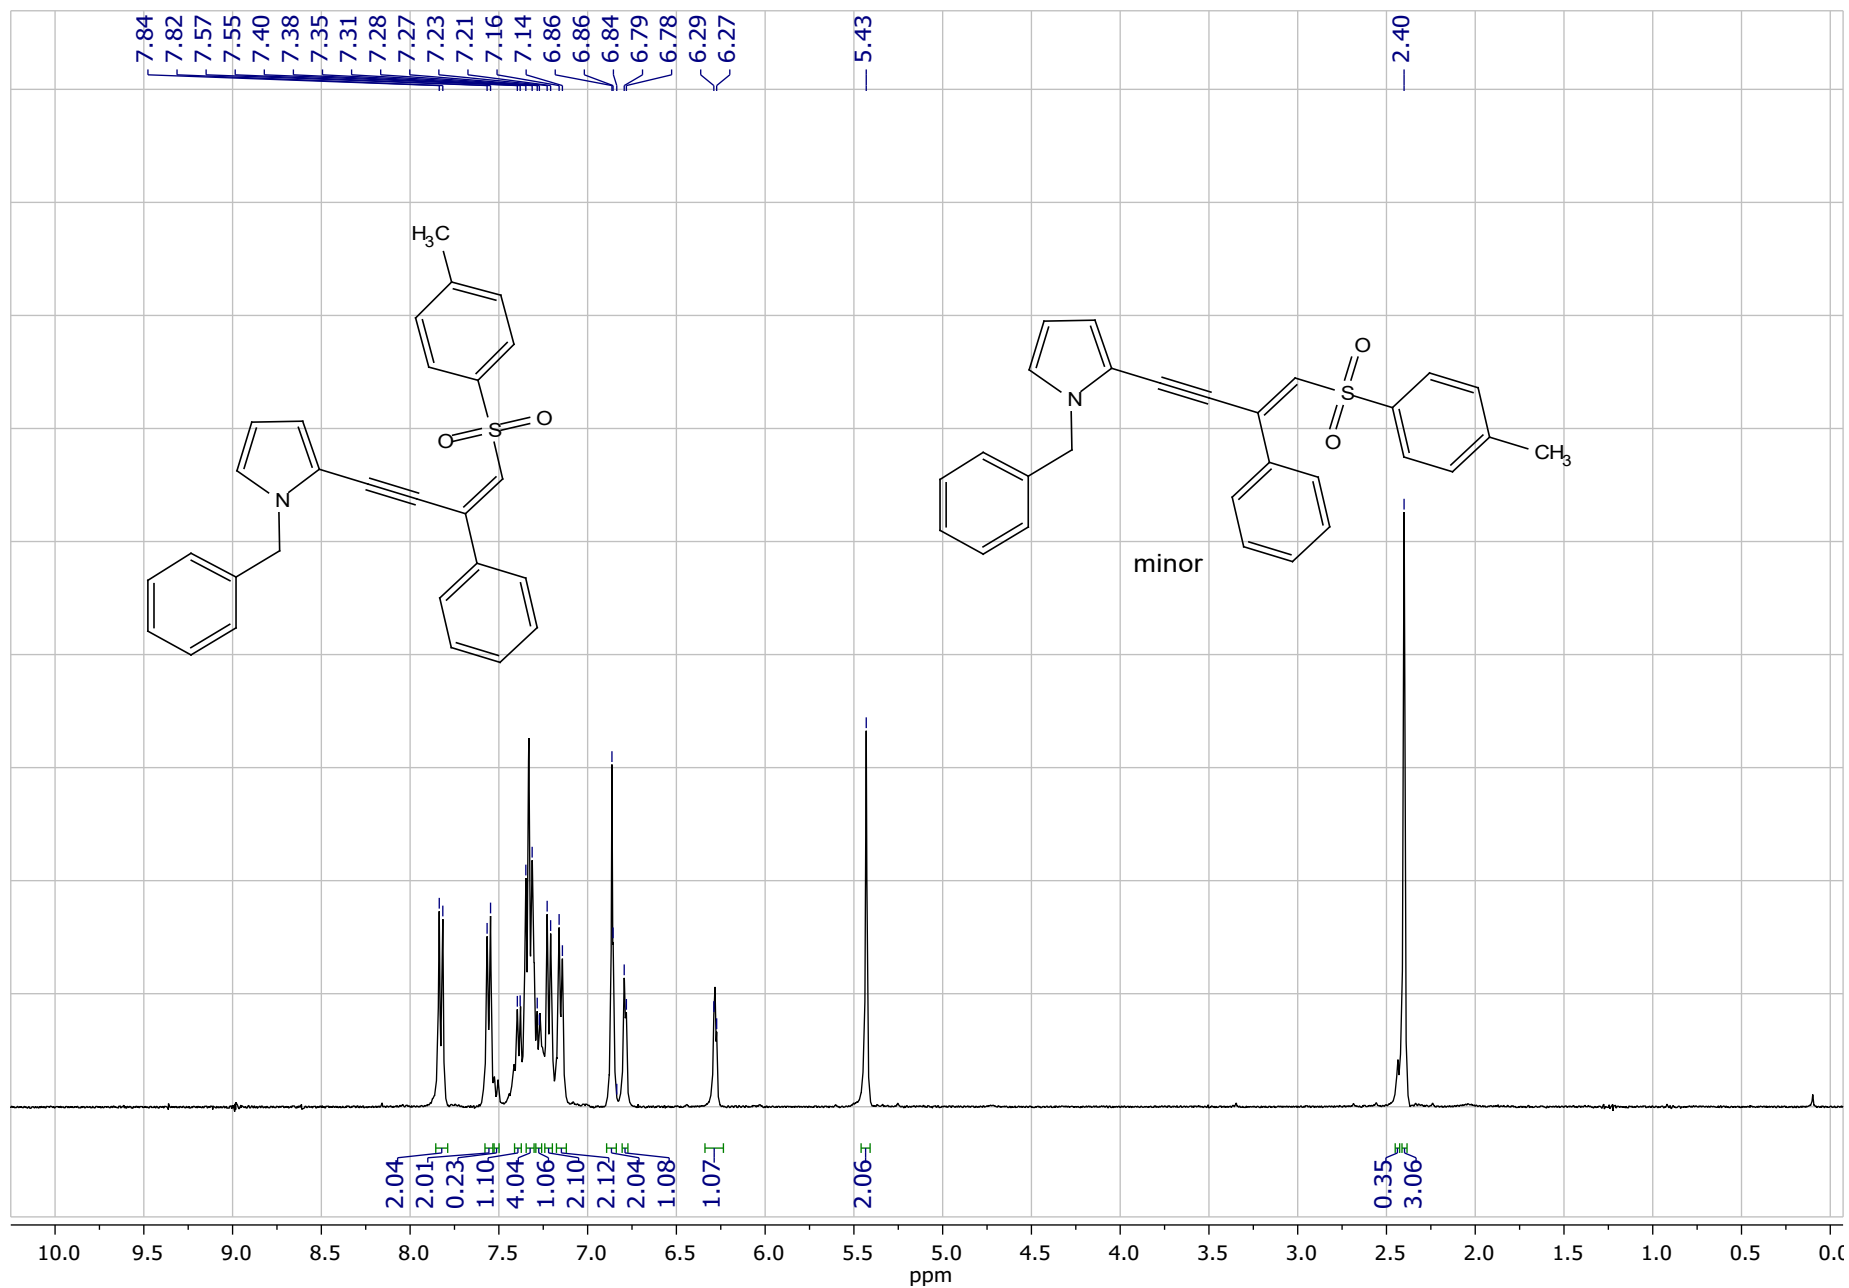

$^{13}\text{C}$  NMR spectrum of (*Z/E*)-1-benzyl-2-(3-phenyl-4-tosylbut-3-en-1-yn-1-yl)-1*H*-pyrrole (**2c**) in  $\text{CDCl}_3$ .

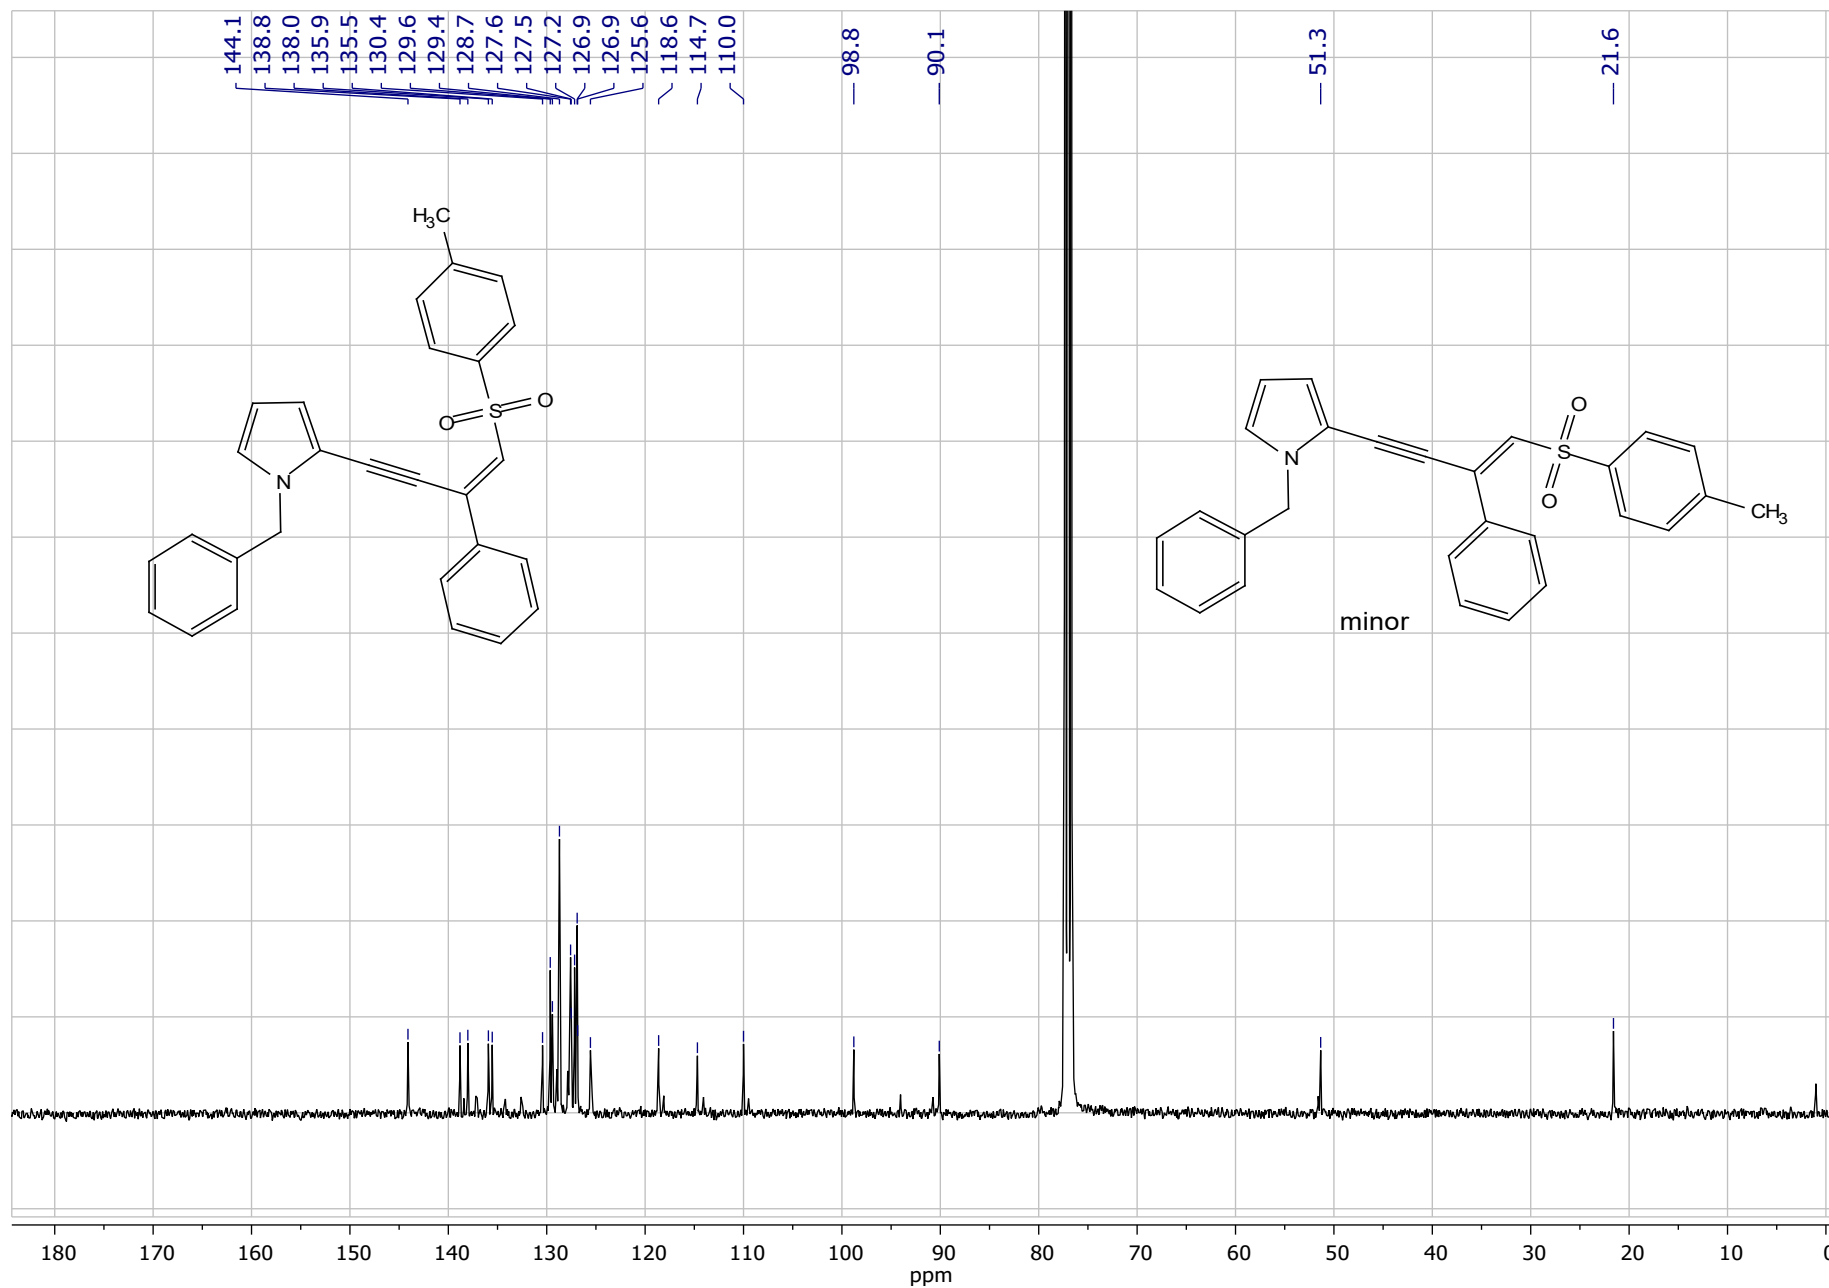

$^1\text{H}$  NMR spectrum of (*Z/E*)-1-methyl-2-phenyl-5-(3-phenyl-4-tosylbut-3-en-1-yn-1-yl)-1*H*-pyrrole (**2d**) in  $\text{CDCl}_3$ .

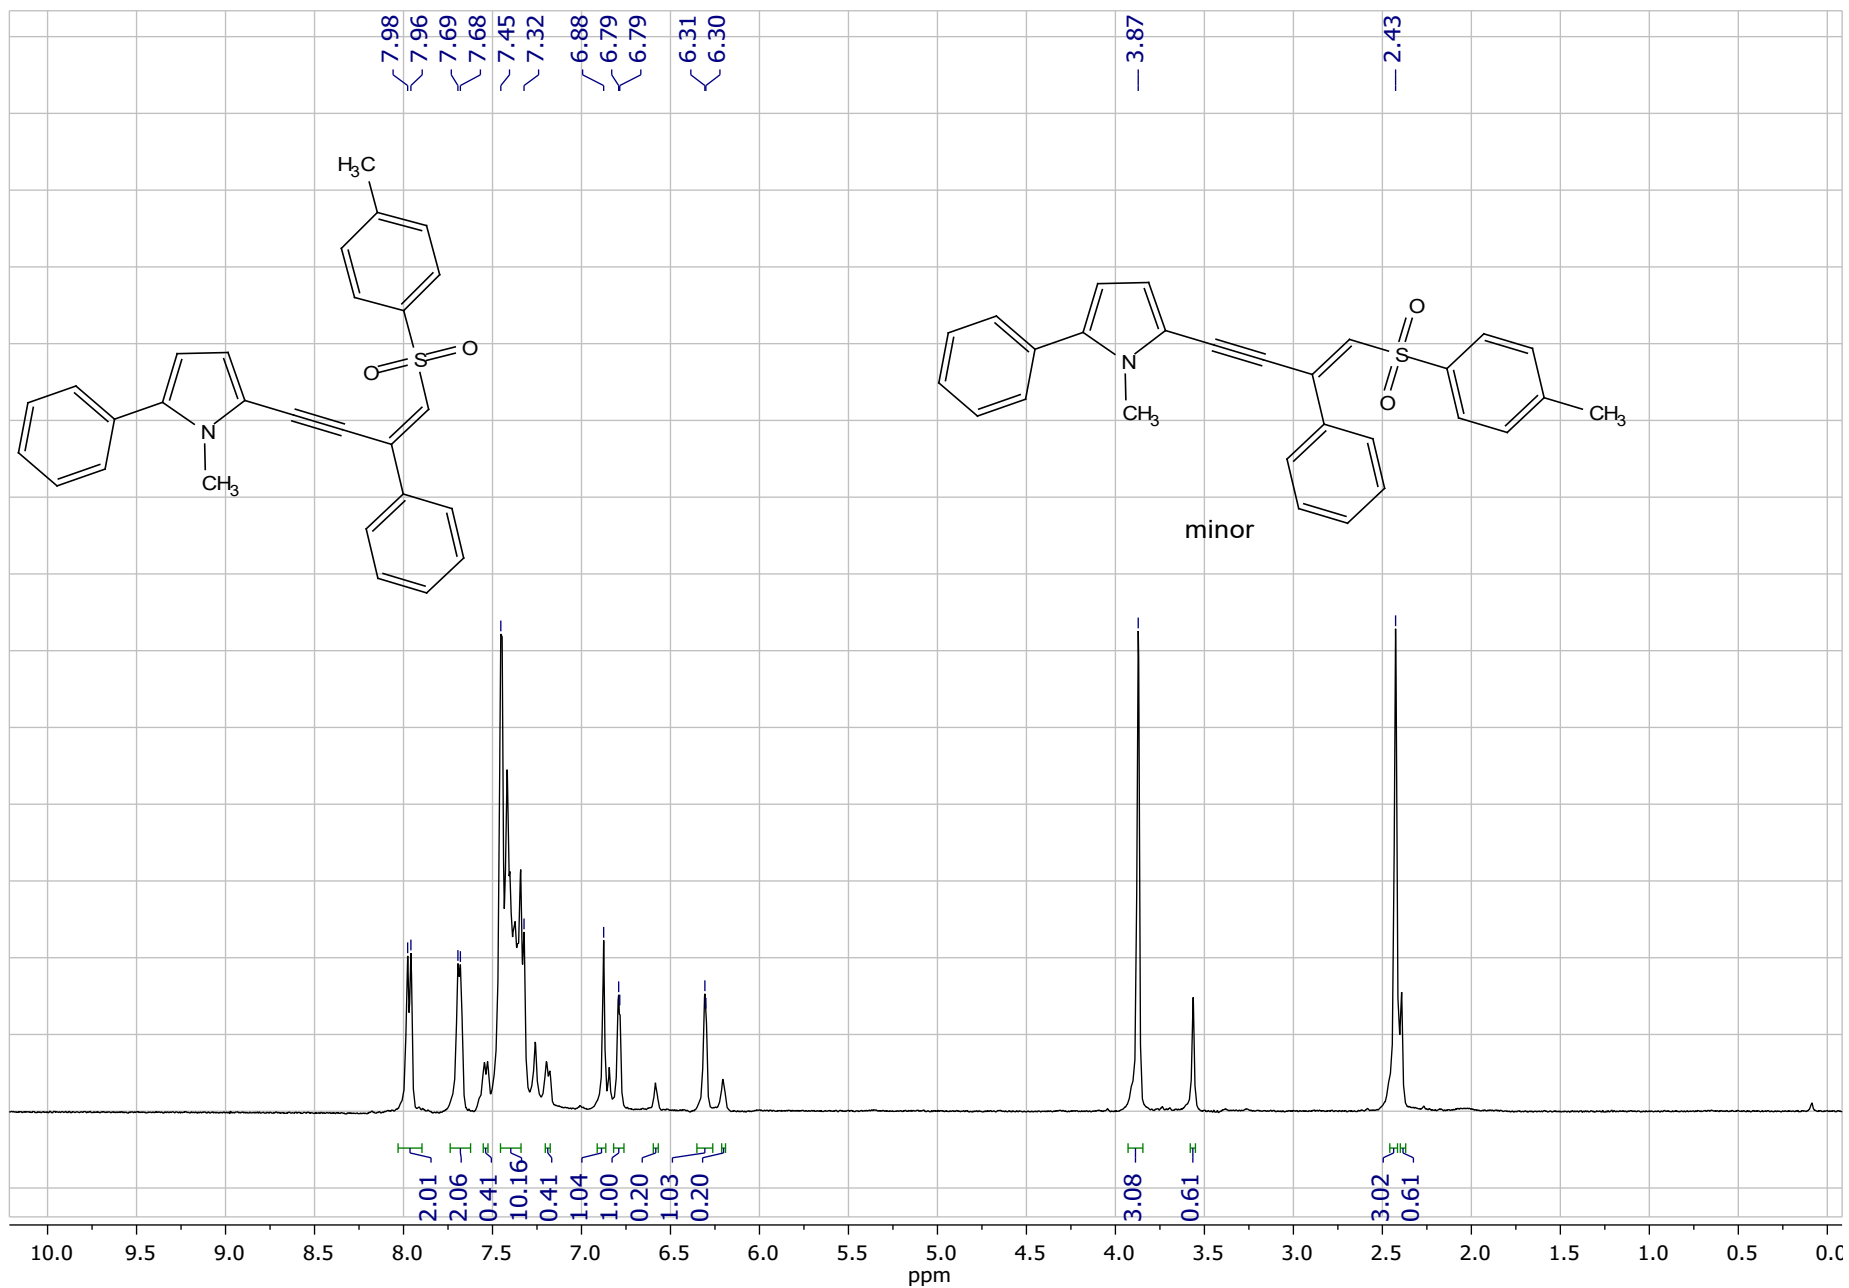

$^{13}\text{C}$  NMR spectrum of (*Z/E*)-1-methyl-2-phenyl-5-(3-phenyl-4-tosylbut-3-en-1-yn-1-yl)-1*H*-pyrrole (**2d**) in  $\text{CDCl}_3$ .

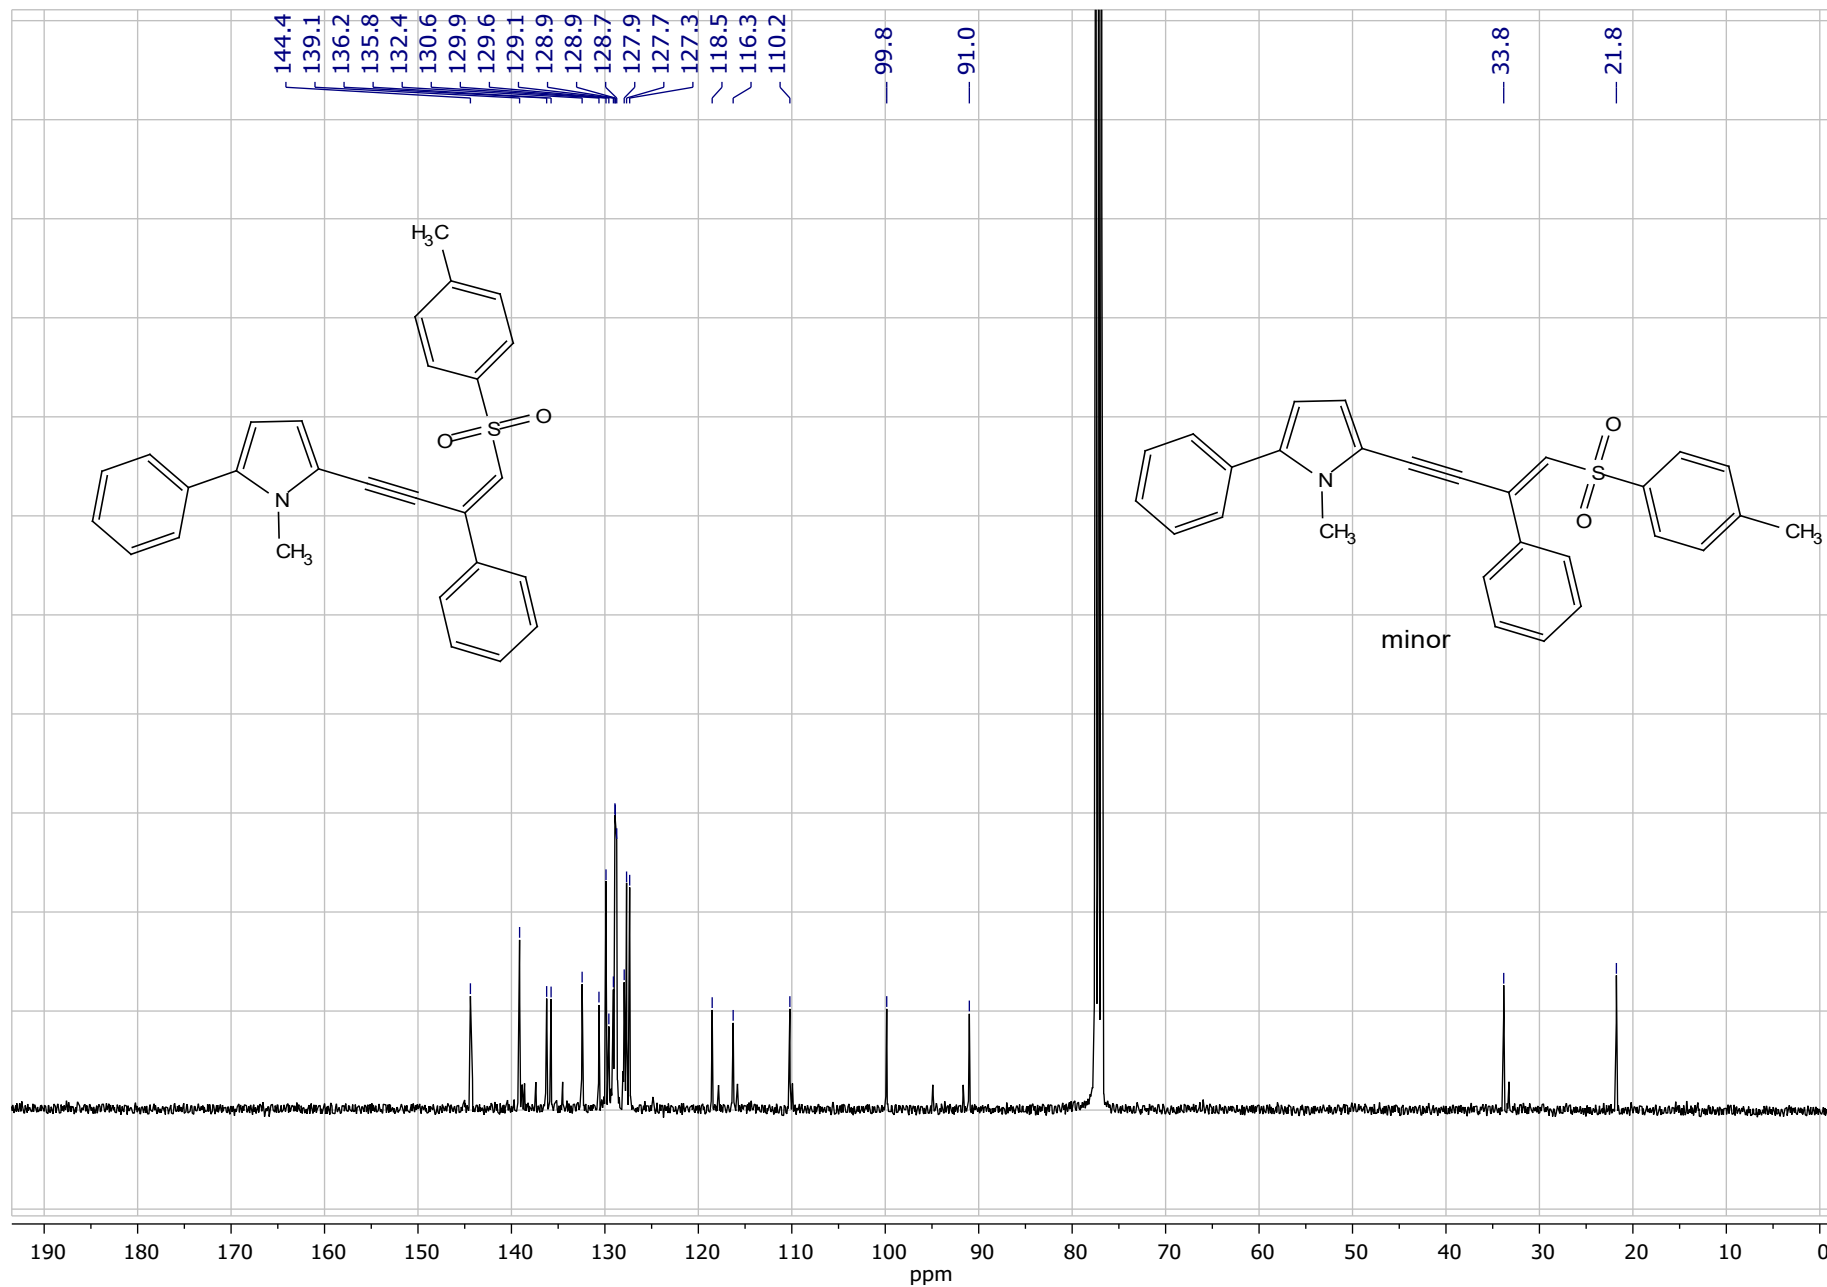

$^1\text{H}$  NMR spectrum of (*E*)-2-(3-(furan-2-yl)-4-tosylbut-3-en-1-yn-1-yl)-1-methyl-5-phenyl-1*H*-pyrrole (**2e**) in  $\text{CDCl}_3$ .

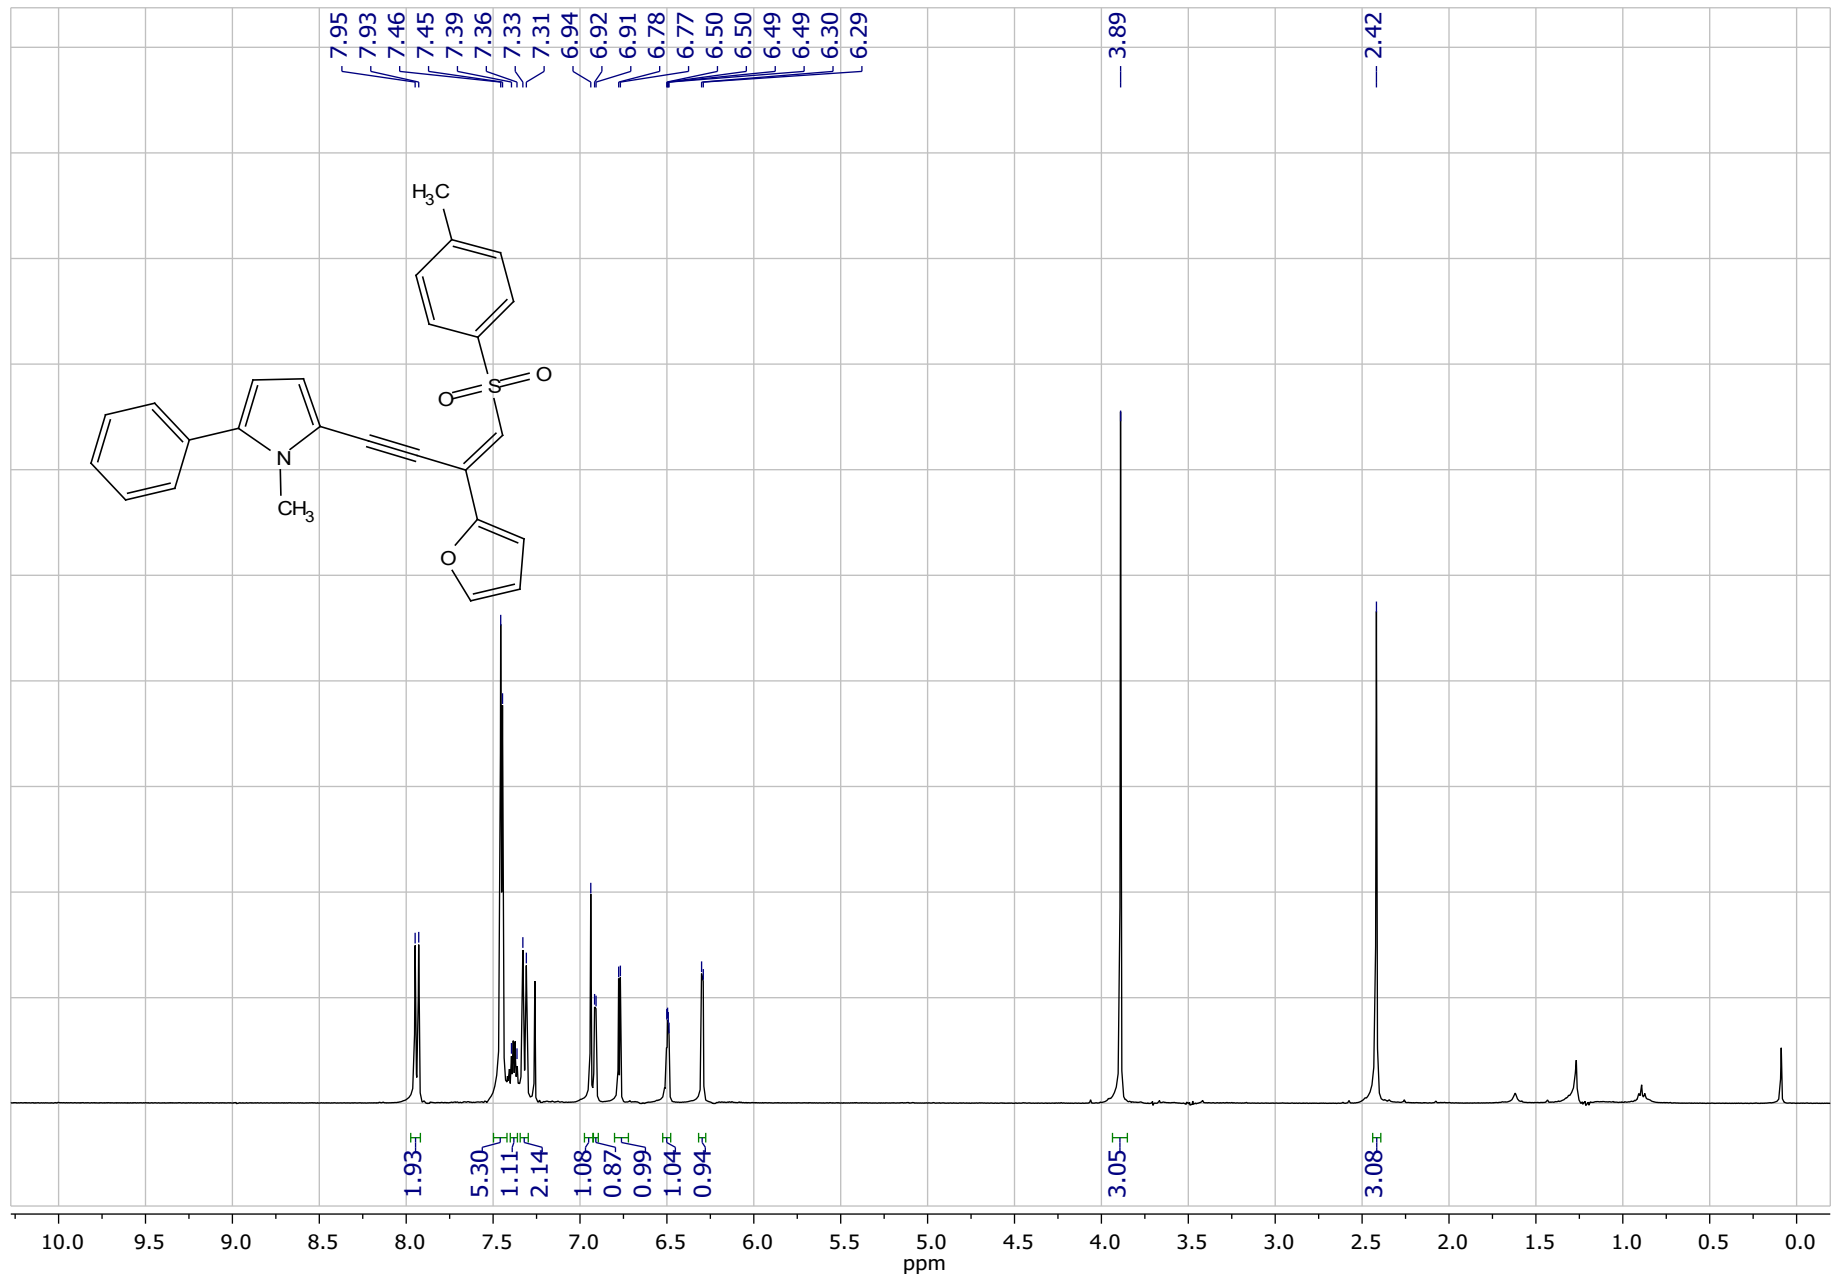

$^{13}\text{C}$  NMR spectrum of (*E*)-2-(3-(furan-2-yl)-4-tosylbut-3-en-1-yn-1-yl)-1-methyl-5-phenyl-1*H*-pyrrole (**2e**) in  $\text{CDCl}_3$ .

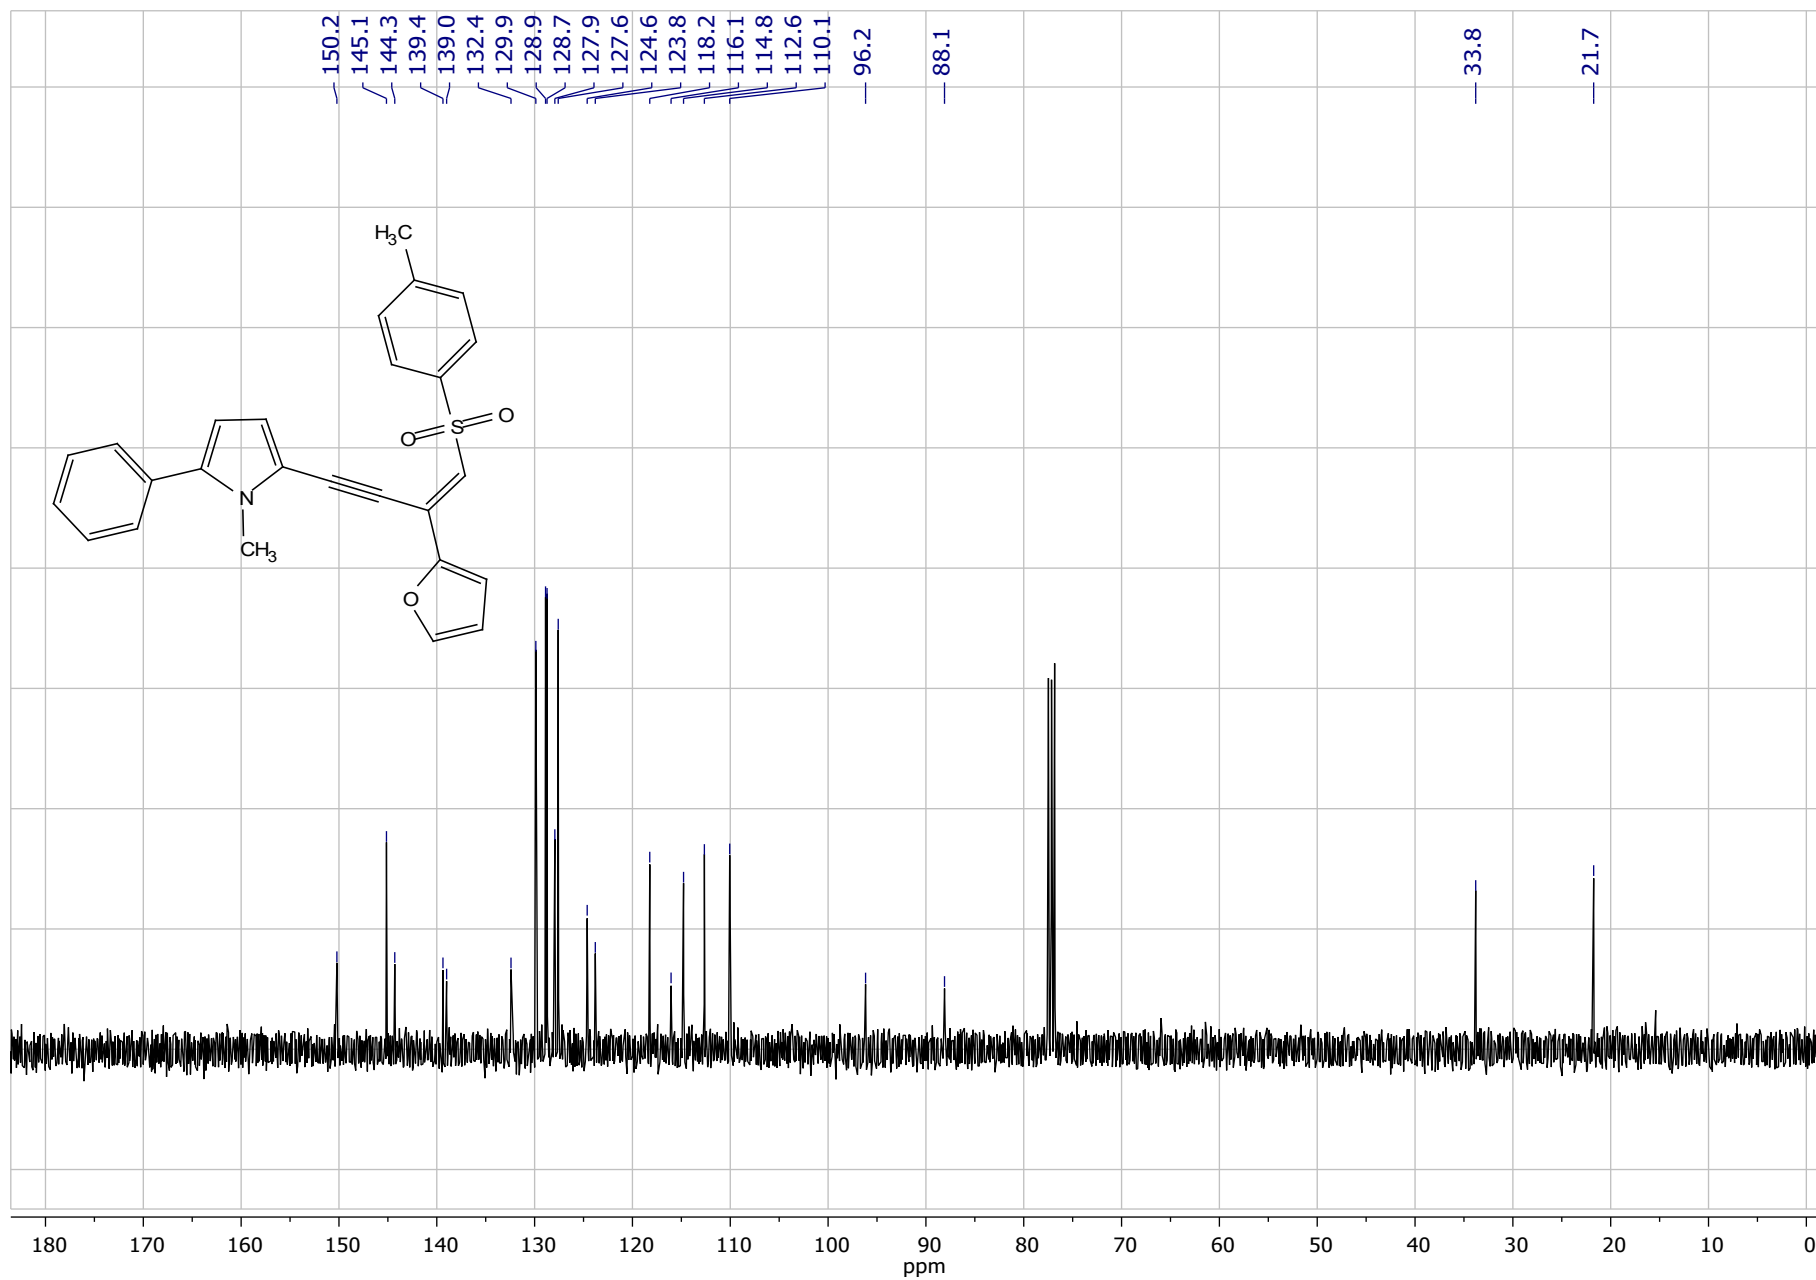

$^1\text{H}$  NMR spectrum of (*E*)-2-(3-(furan-2-yl)-4-tosylbut-3-en-1-yn-1-yl)-1-methyl-5-(thiophen-2-yl)-1*H*-pyrrole (**2f**) in  $\text{CDCl}_3$ .

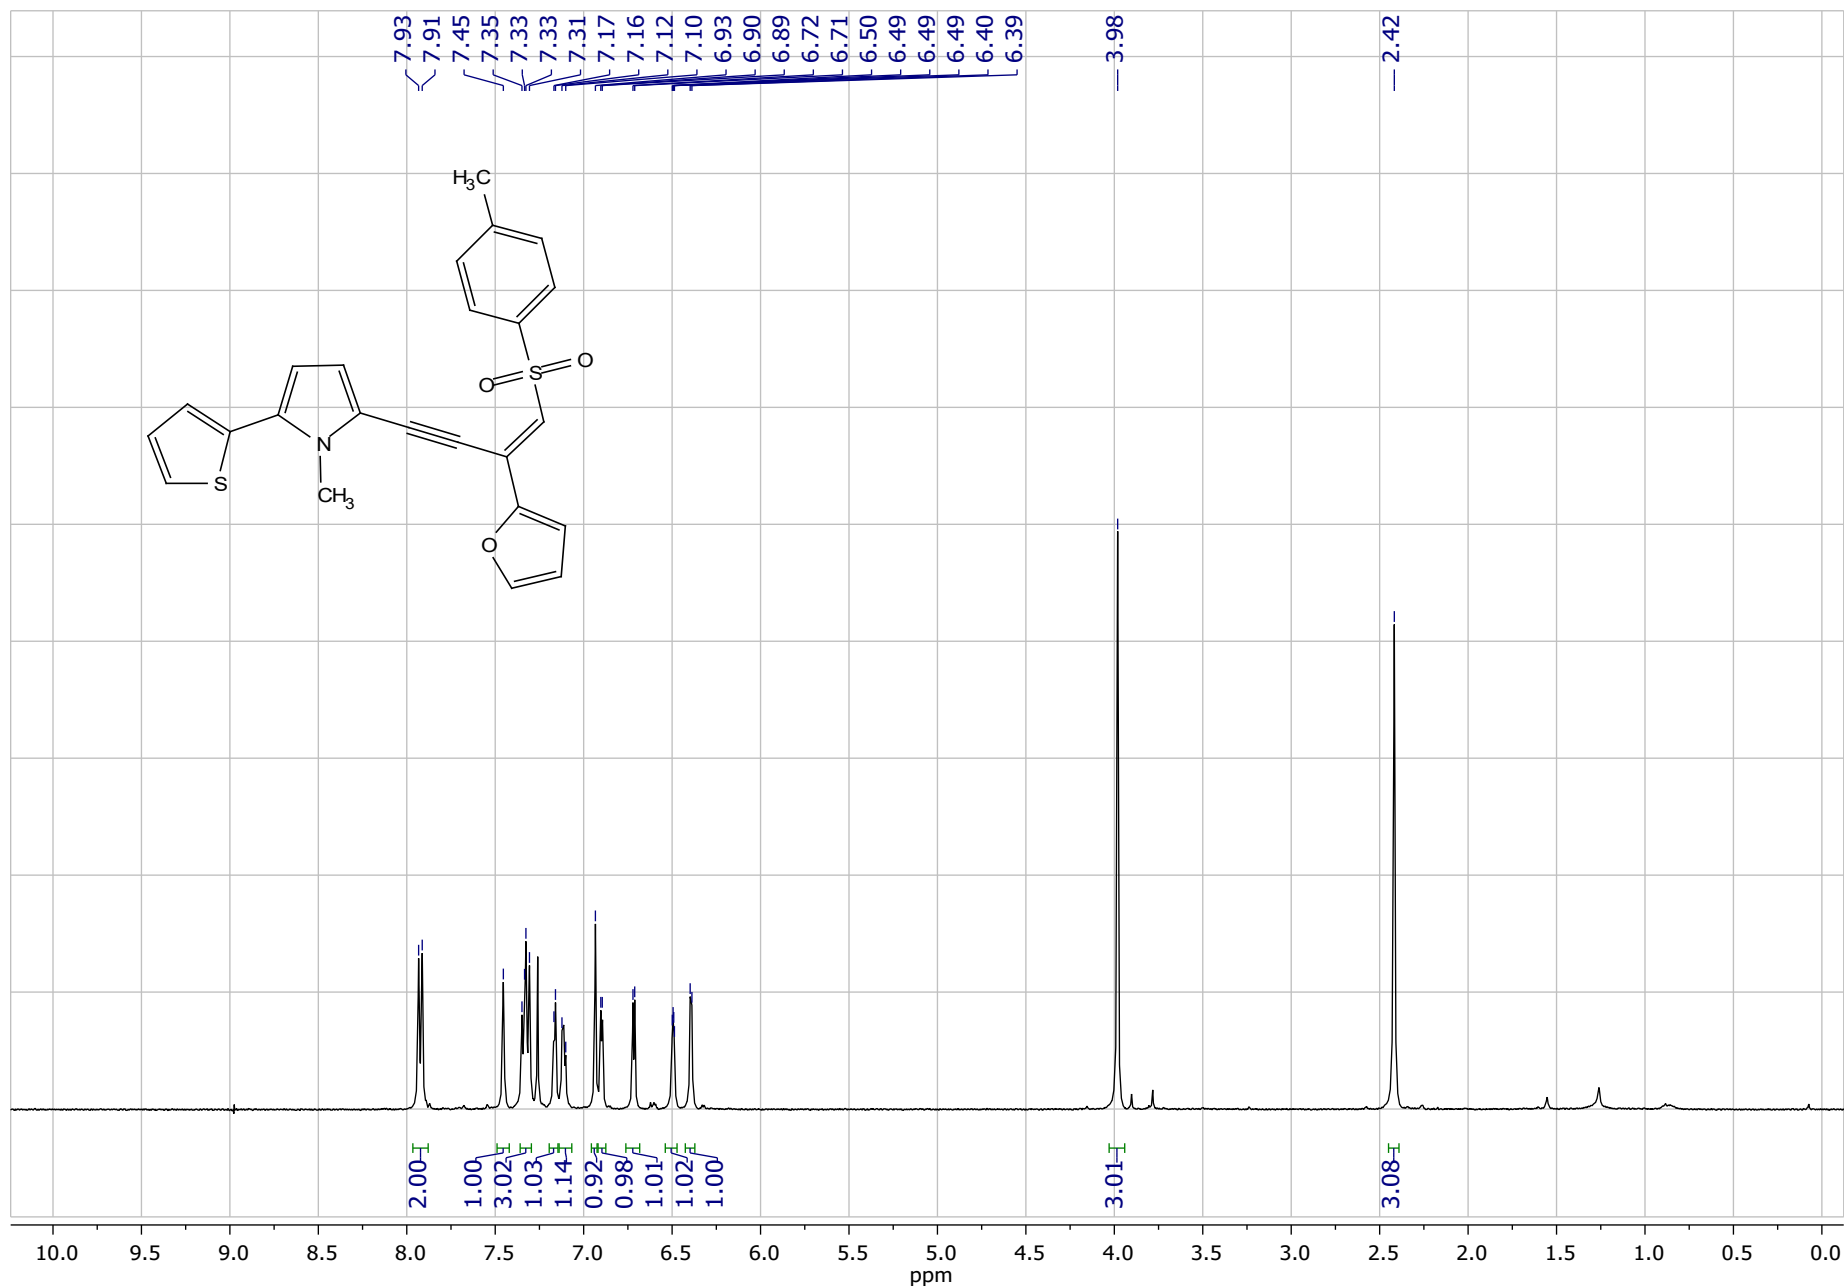

$^{13}\text{C}$  NMR spectrum of (*E*)-2-(3-(furan-2-yl)-4-tosylbut-3-en-1-yn-1-yl)-1-methyl-5-(thiophen-2-yl)-1*H*-pyrrole (**2f**) in  $\text{CDCl}_3$ .

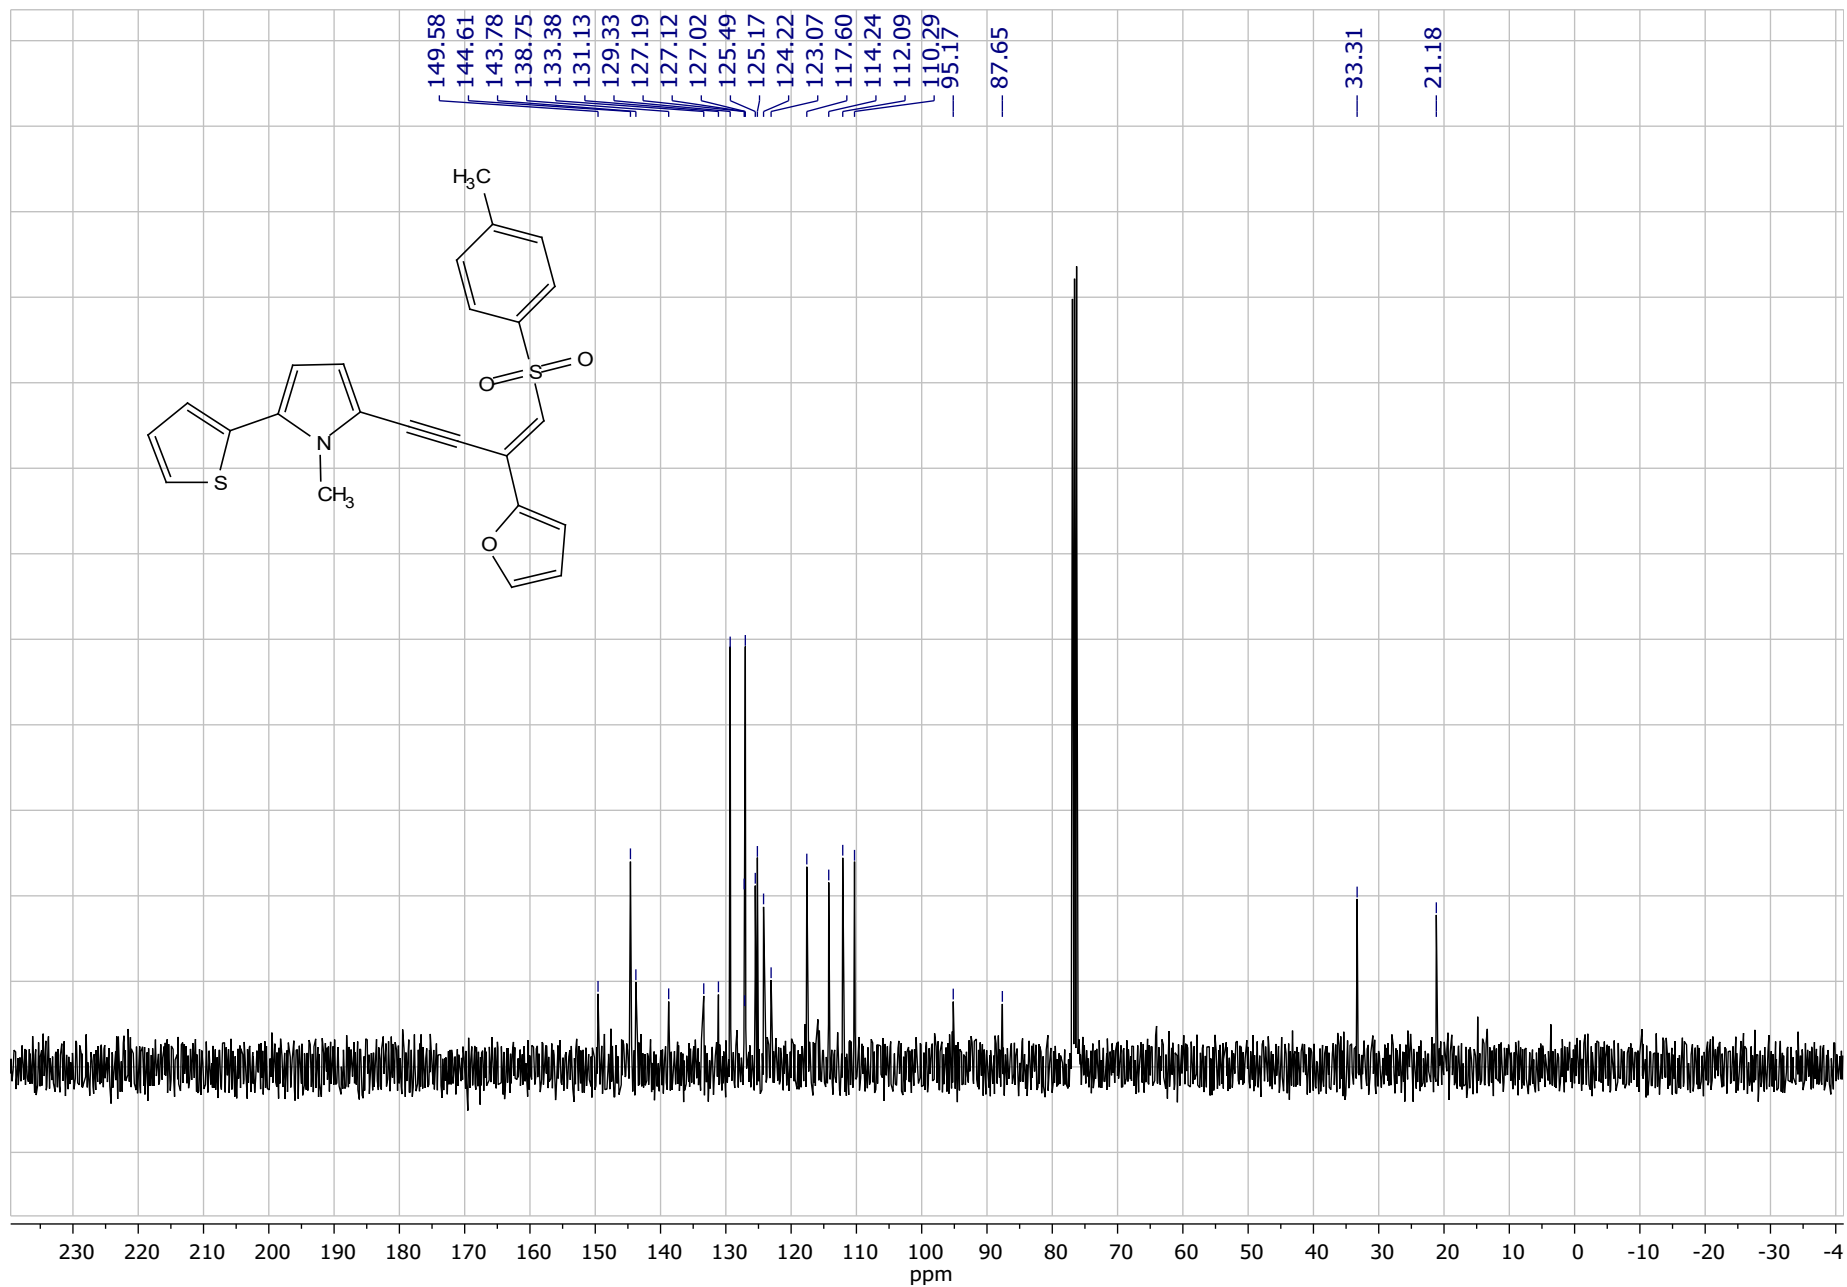



<sup>1</sup>H NMR spectrum of (Z)-2-(4-chlorophenyl)-5-(3-phenyl-4-tosylbut-3-en-1-yn-1-yl)-1-vinyl-1H-pyrrole (**2g**) in CDCl<sub>3</sub>.

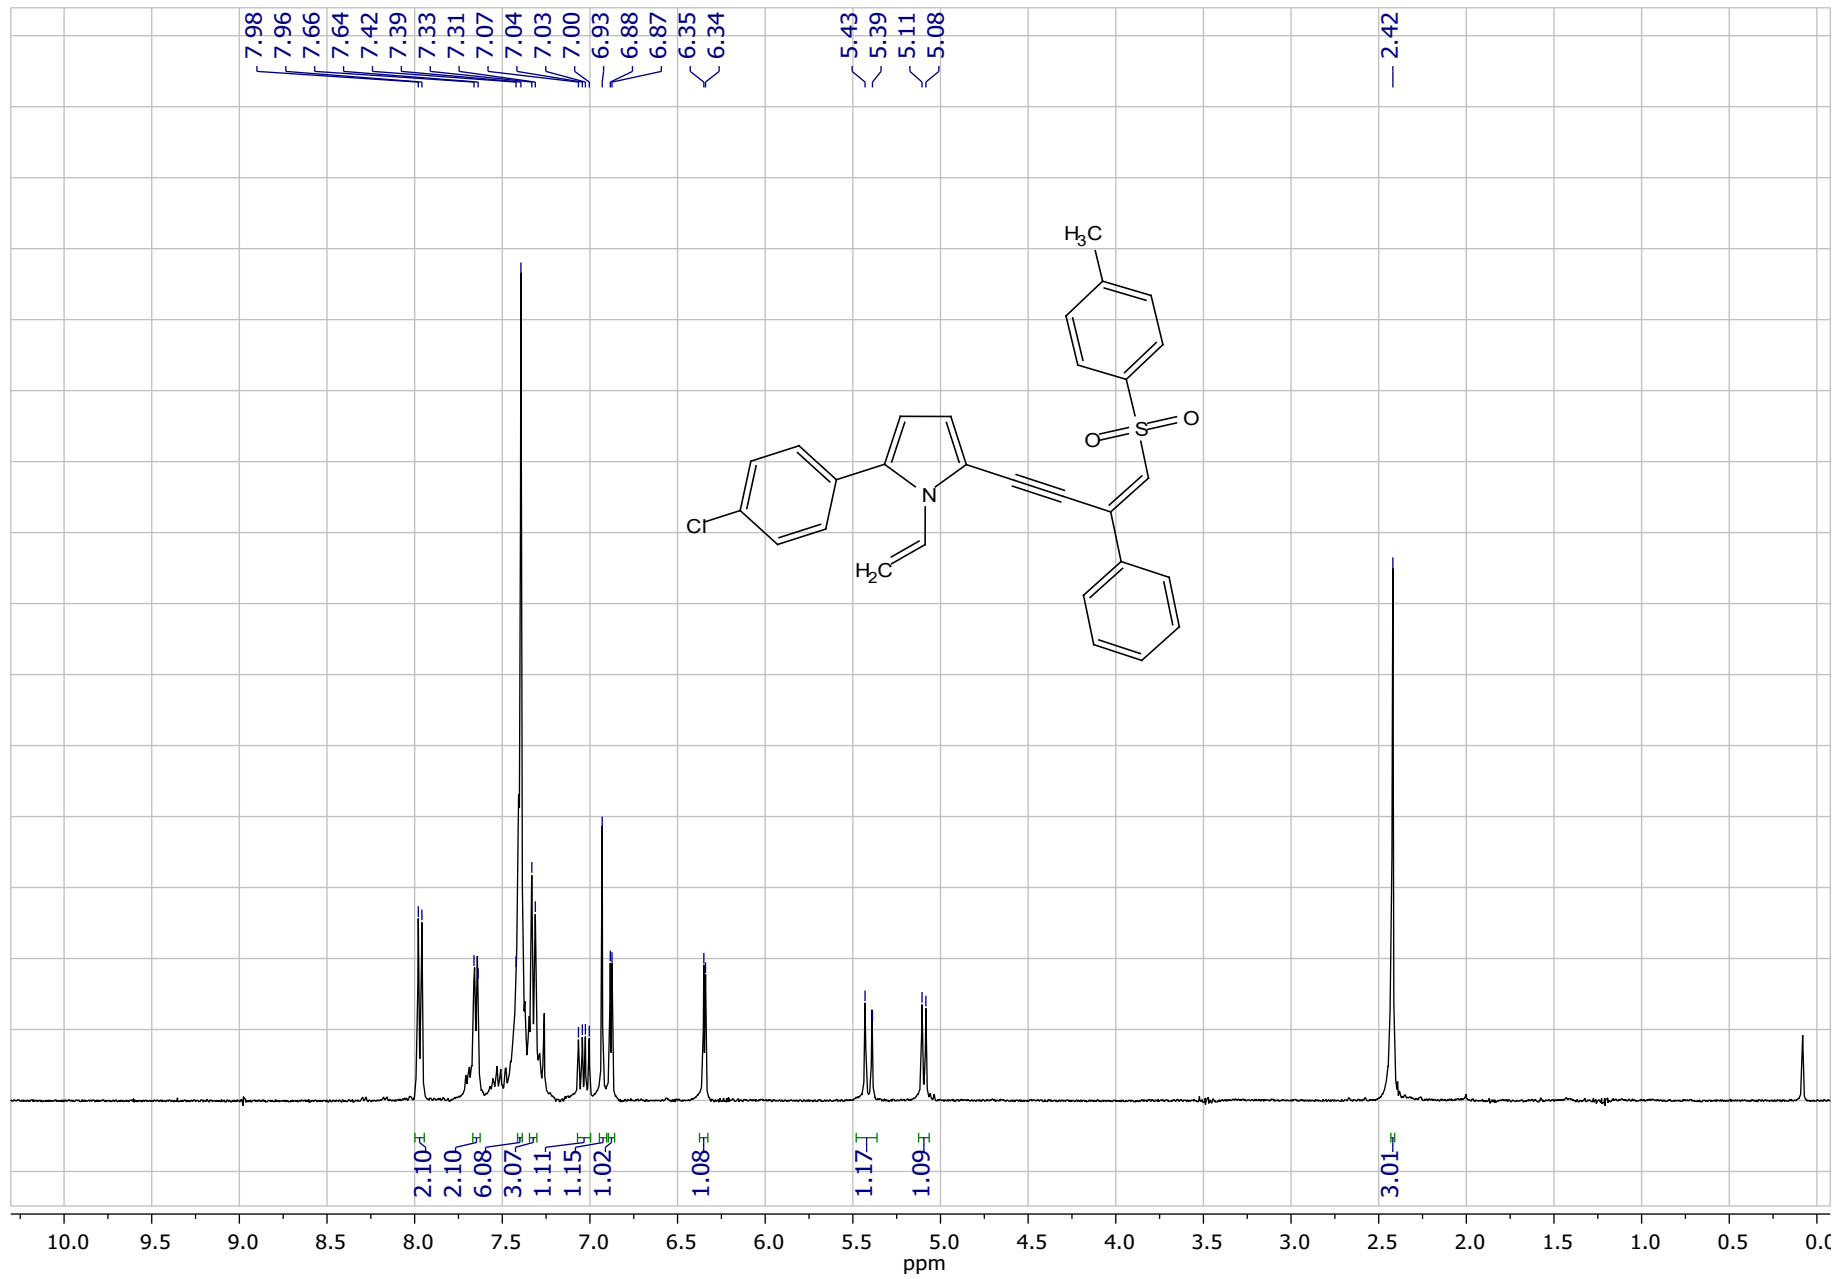

$^{13}\text{C}$  NMR spectrum of (Z)-2-(4-chlorophenyl)-5-(3-phenyl-4-tosylbut-3-en-1-yn-1-yl)-1-vinyl-1H-pyrrole (**2g**) in  $\text{CDCl}_3$ .

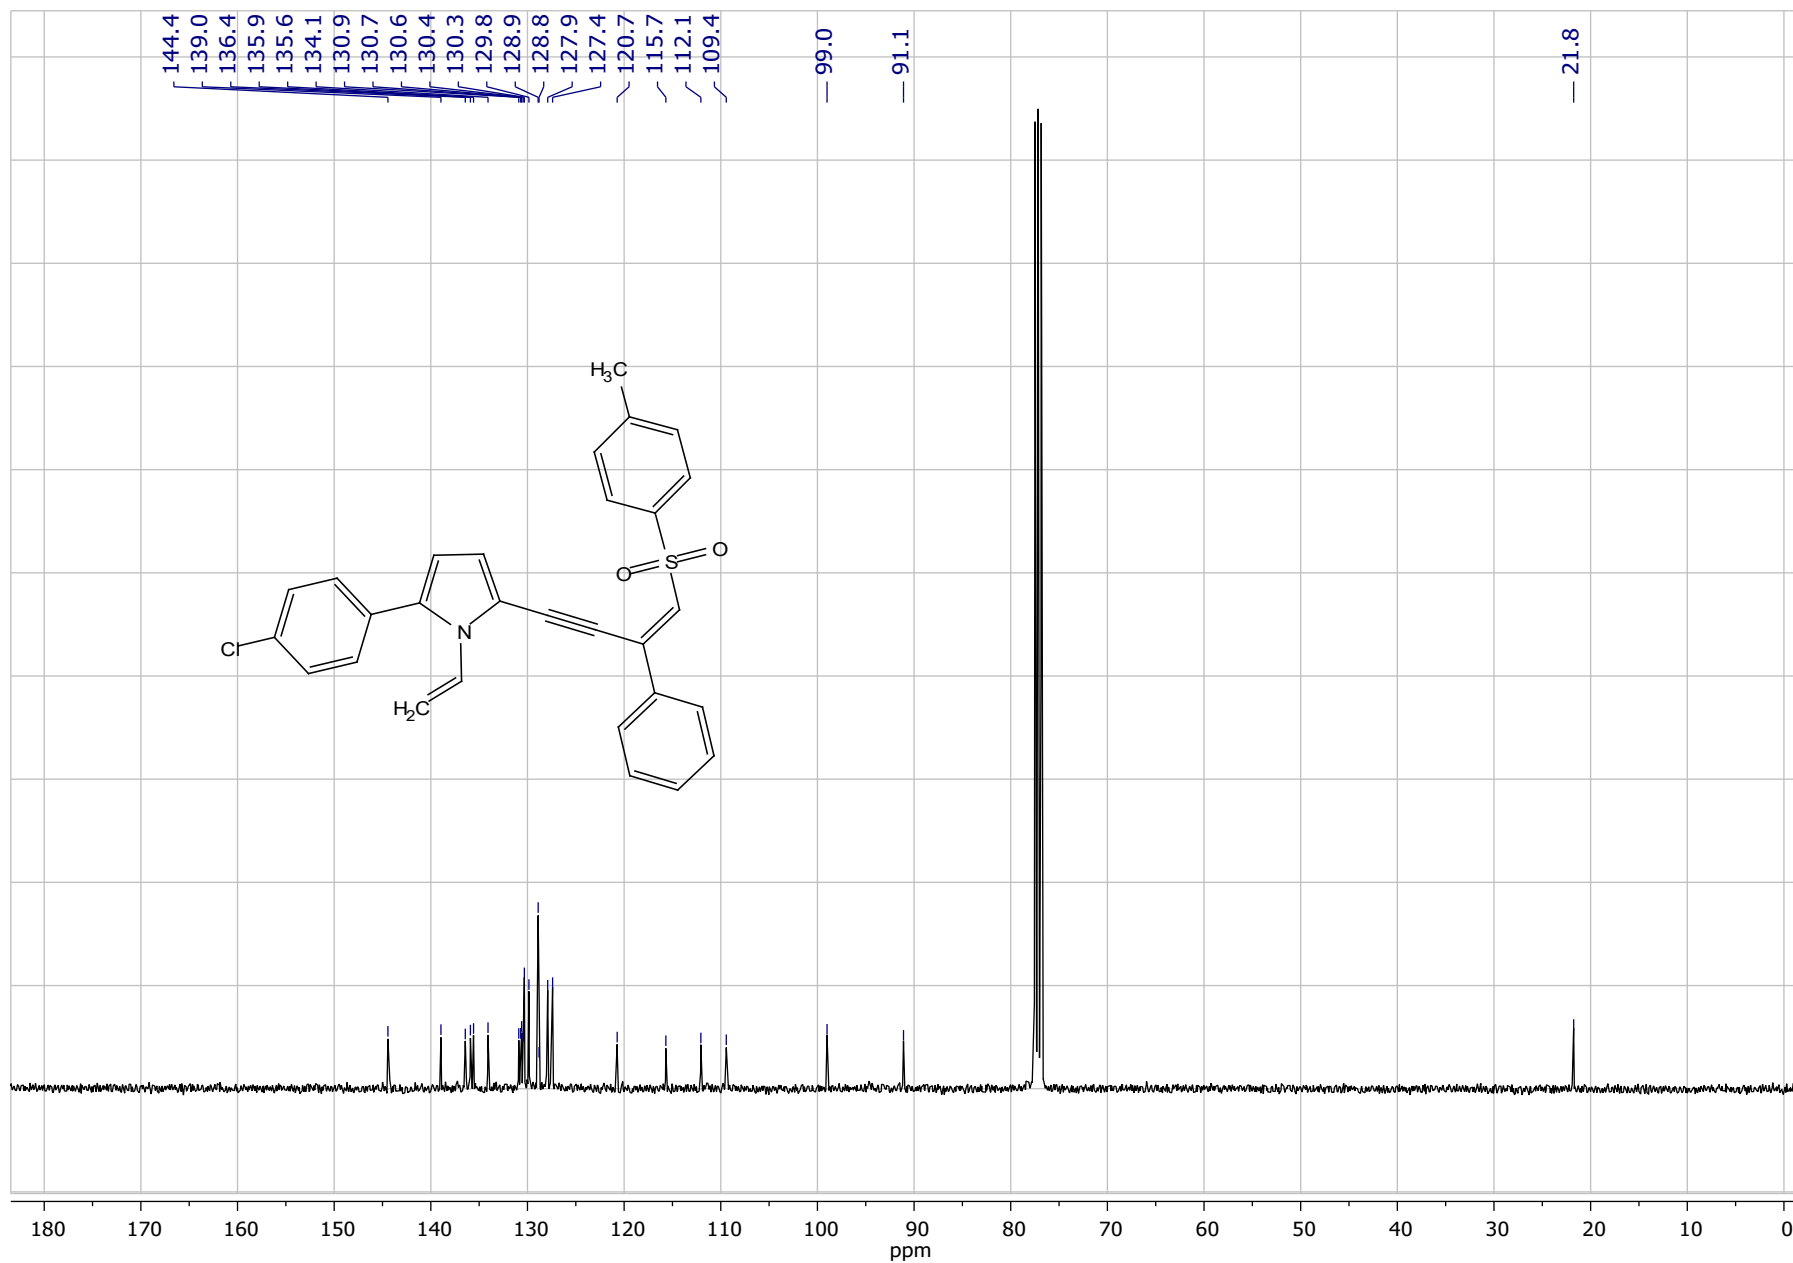

$^1\text{H}$  NMR spectrum of (*E*)-2-(3-(furan-2-yl)-4-tosylbut-3-en-1-yn-1-yl)-1-methyl-4,5,6,7-tetrahydro-1*H*-indole (**2h**) in  $\text{CDCl}_3$ .

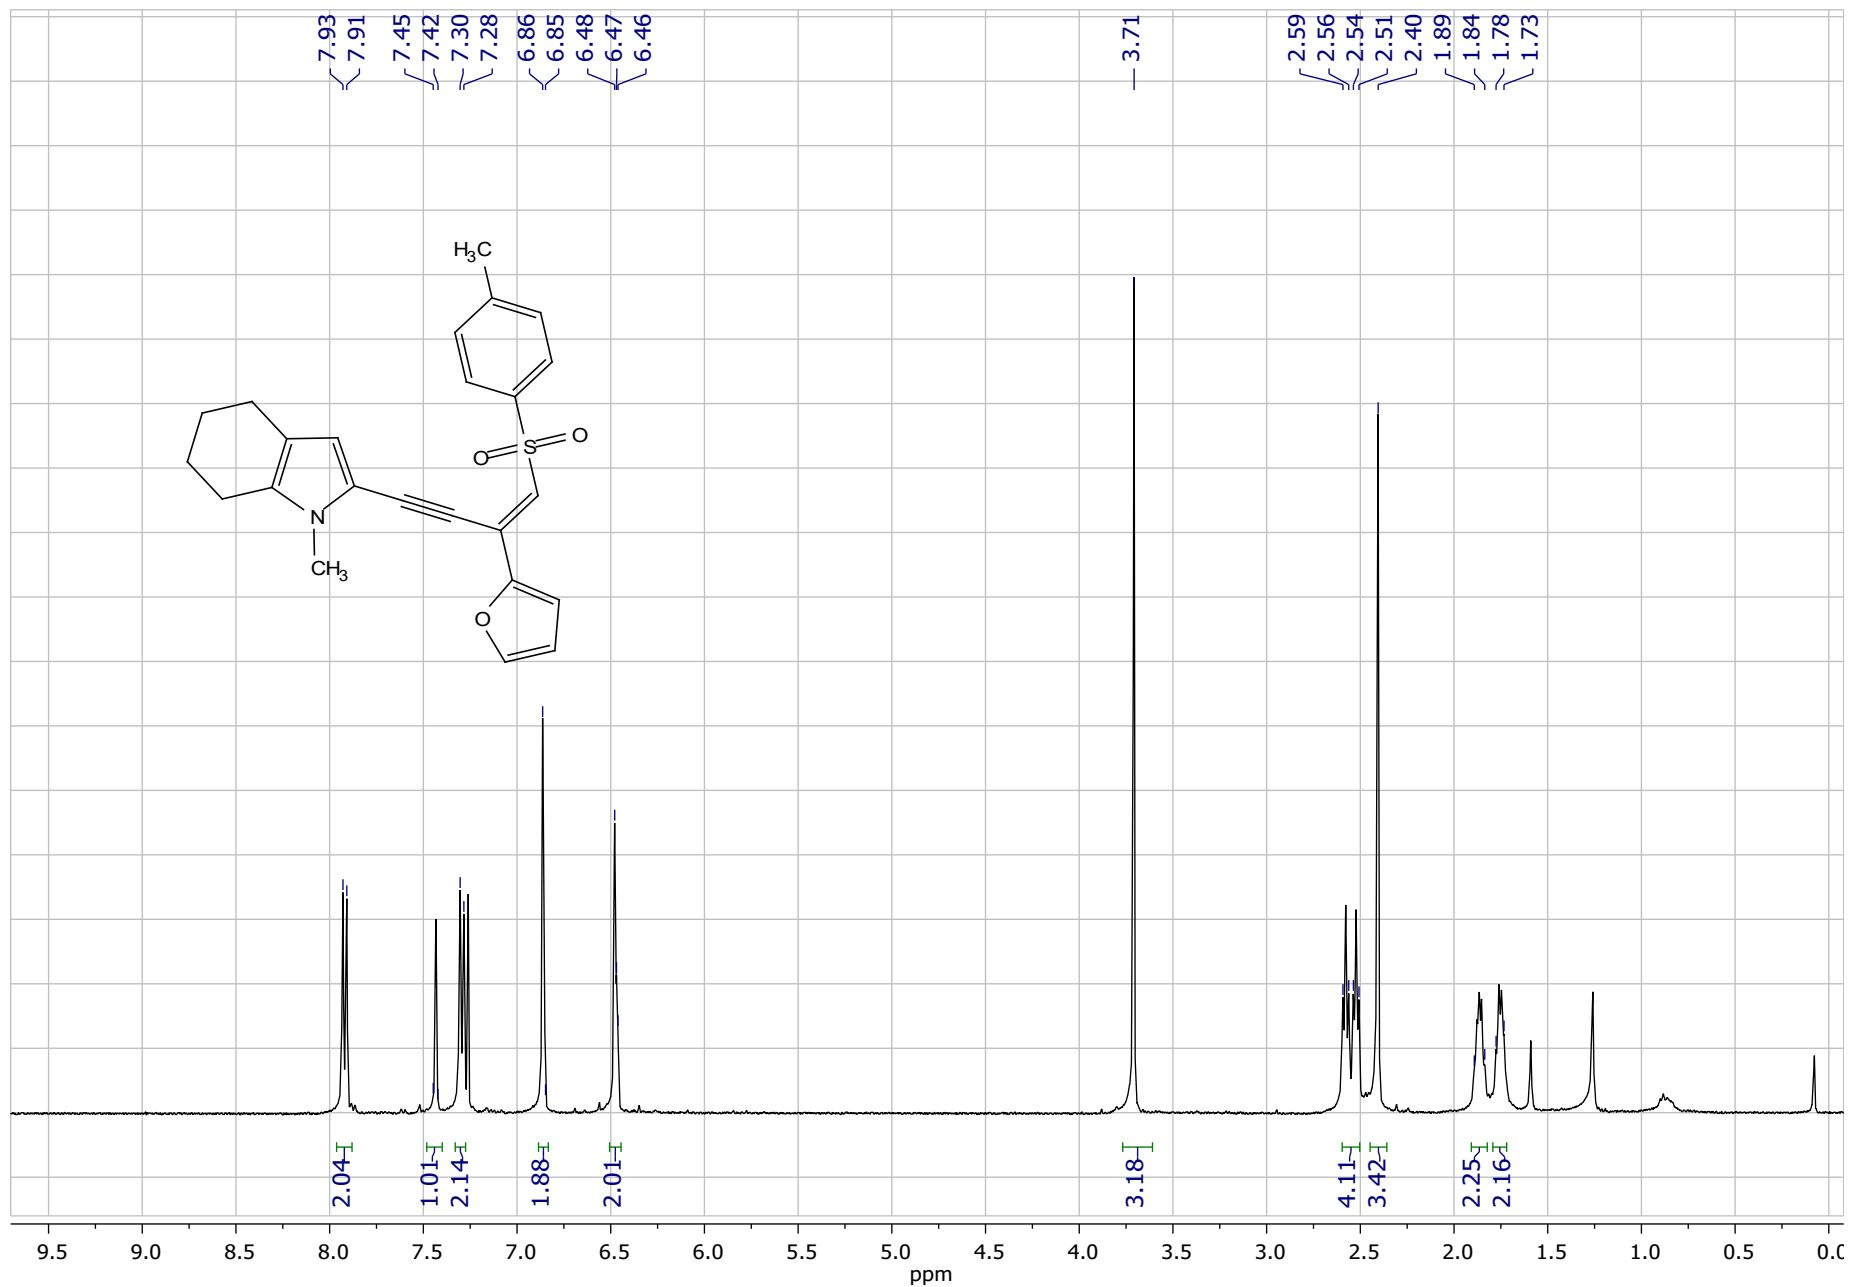

$^{13}\text{C}$  NMR spectrum of (*E*)-2-(3-(furan-2-yl)-4-tosylbut-3-en-1-yn-1-yl)-1-methyl-4,5,6,7-tetrahydro-1*H*-indole (**2h**) in  $\text{CDCl}_3$ .

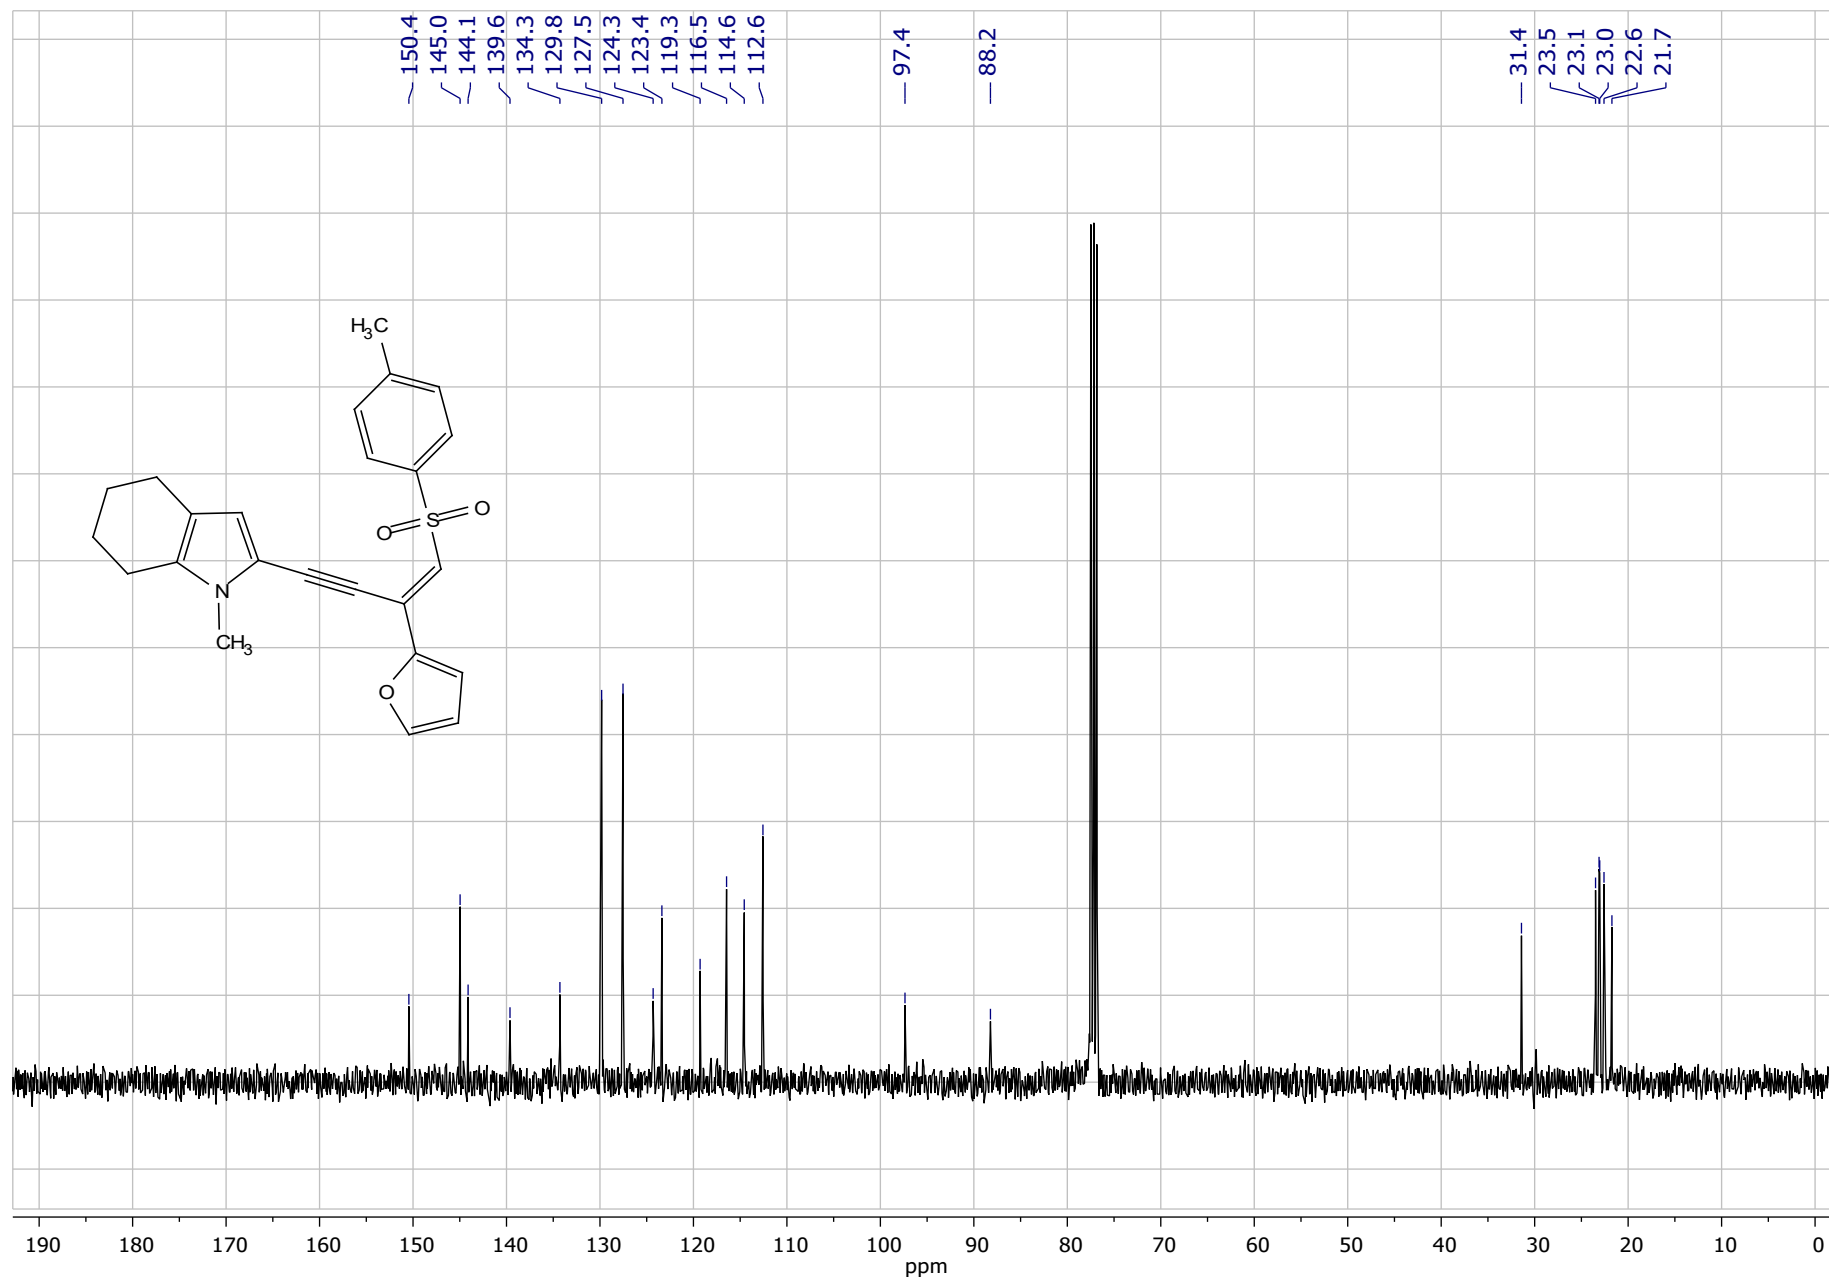

<sup>1</sup>H NMR spectrum of (*E/Z*)-1-octyl-2-(3-(thiophen-2-yl)-4-tosylbut-3-en-1-yn-1-yl)-4,5,6,7-tetrahydro-1*H*-indole (**2i**) in CDCl<sub>3</sub>.

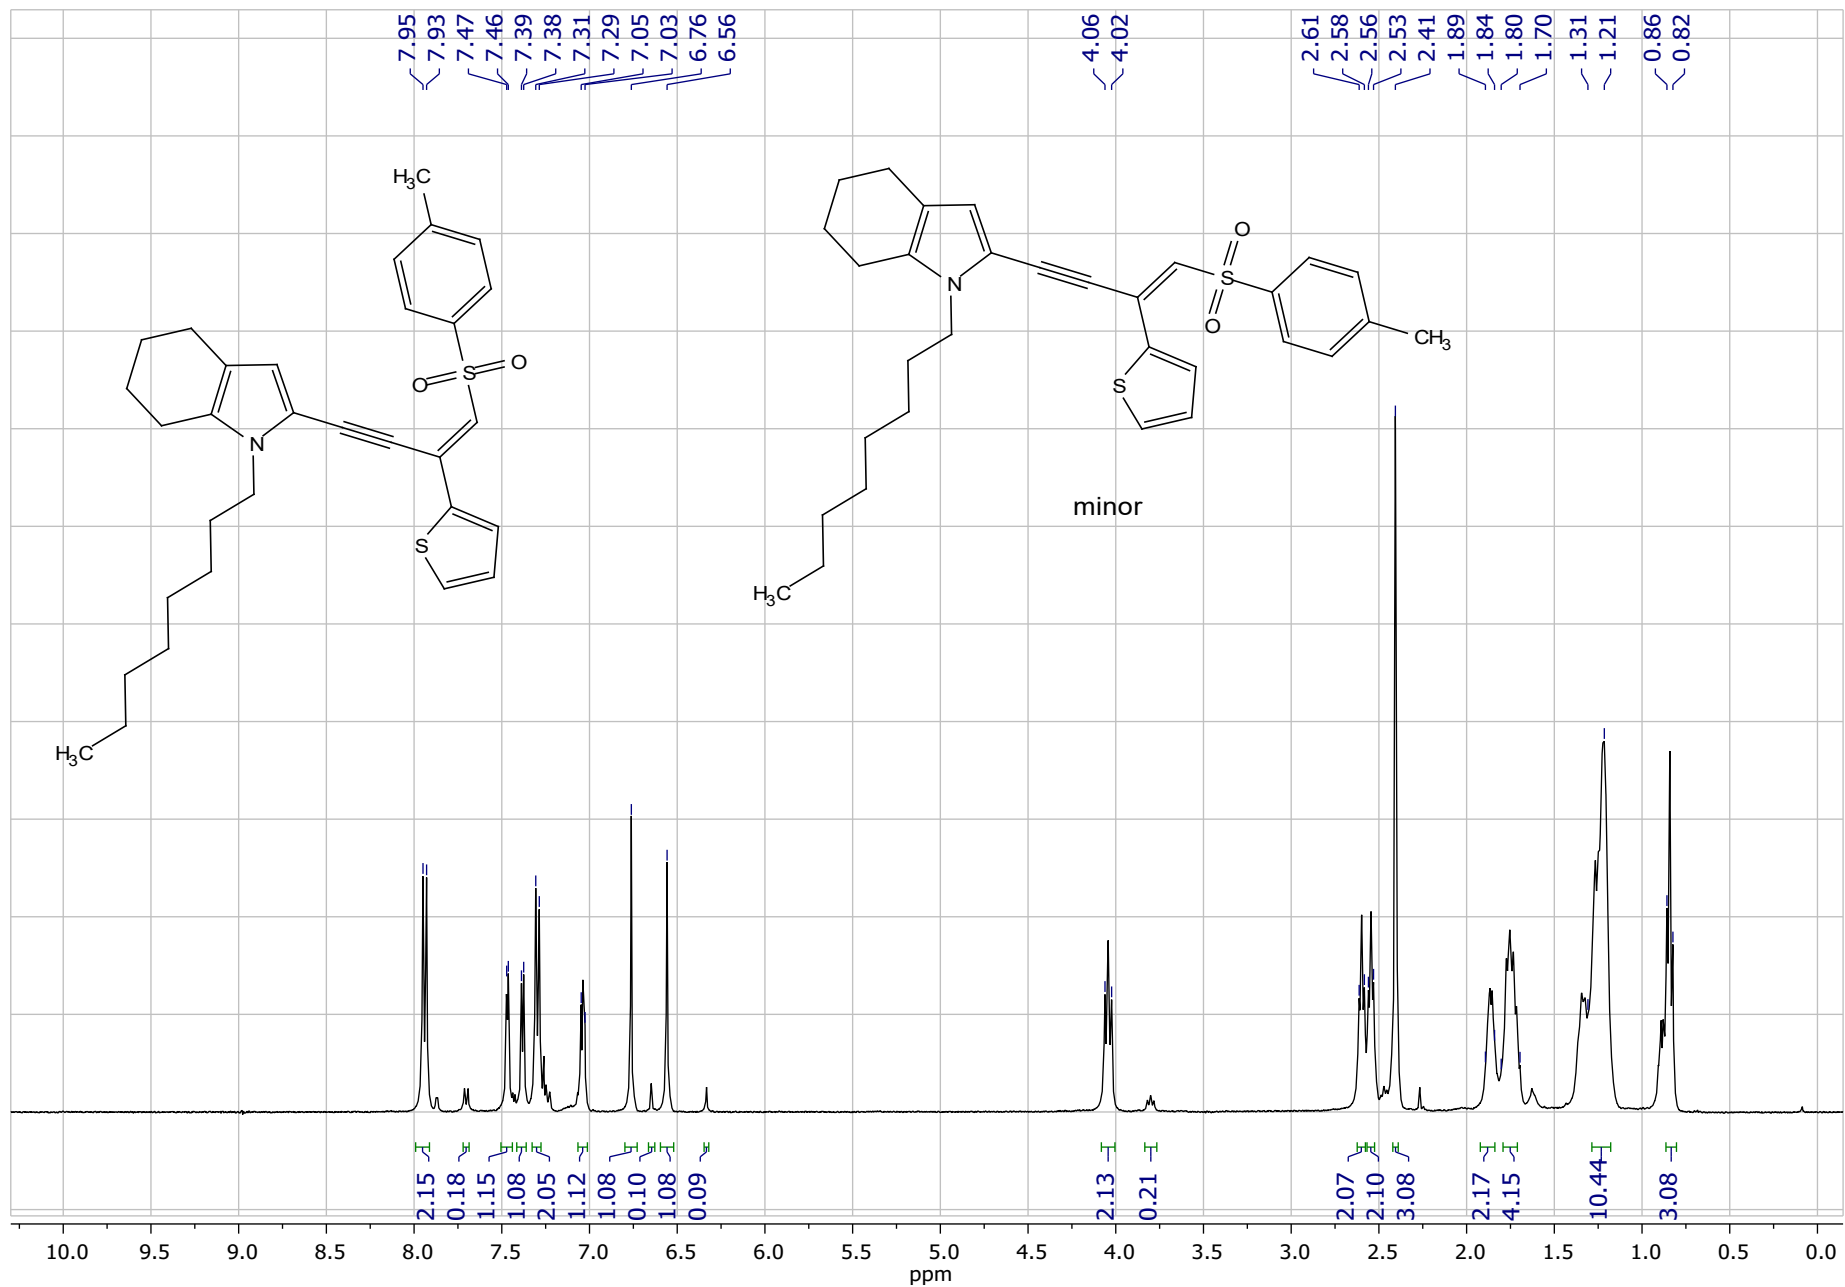

$^{13}\text{C}$  NMR spectrum of (*E/Z*)-1-octyl-2-(3-(thiophen-2-yl)-4-tosylbut-3-en-1-yn-1-yl)-4,5,6,7-tetrahydro-1*H*-indole (**2i**) in  $\text{CDCl}_3$ .

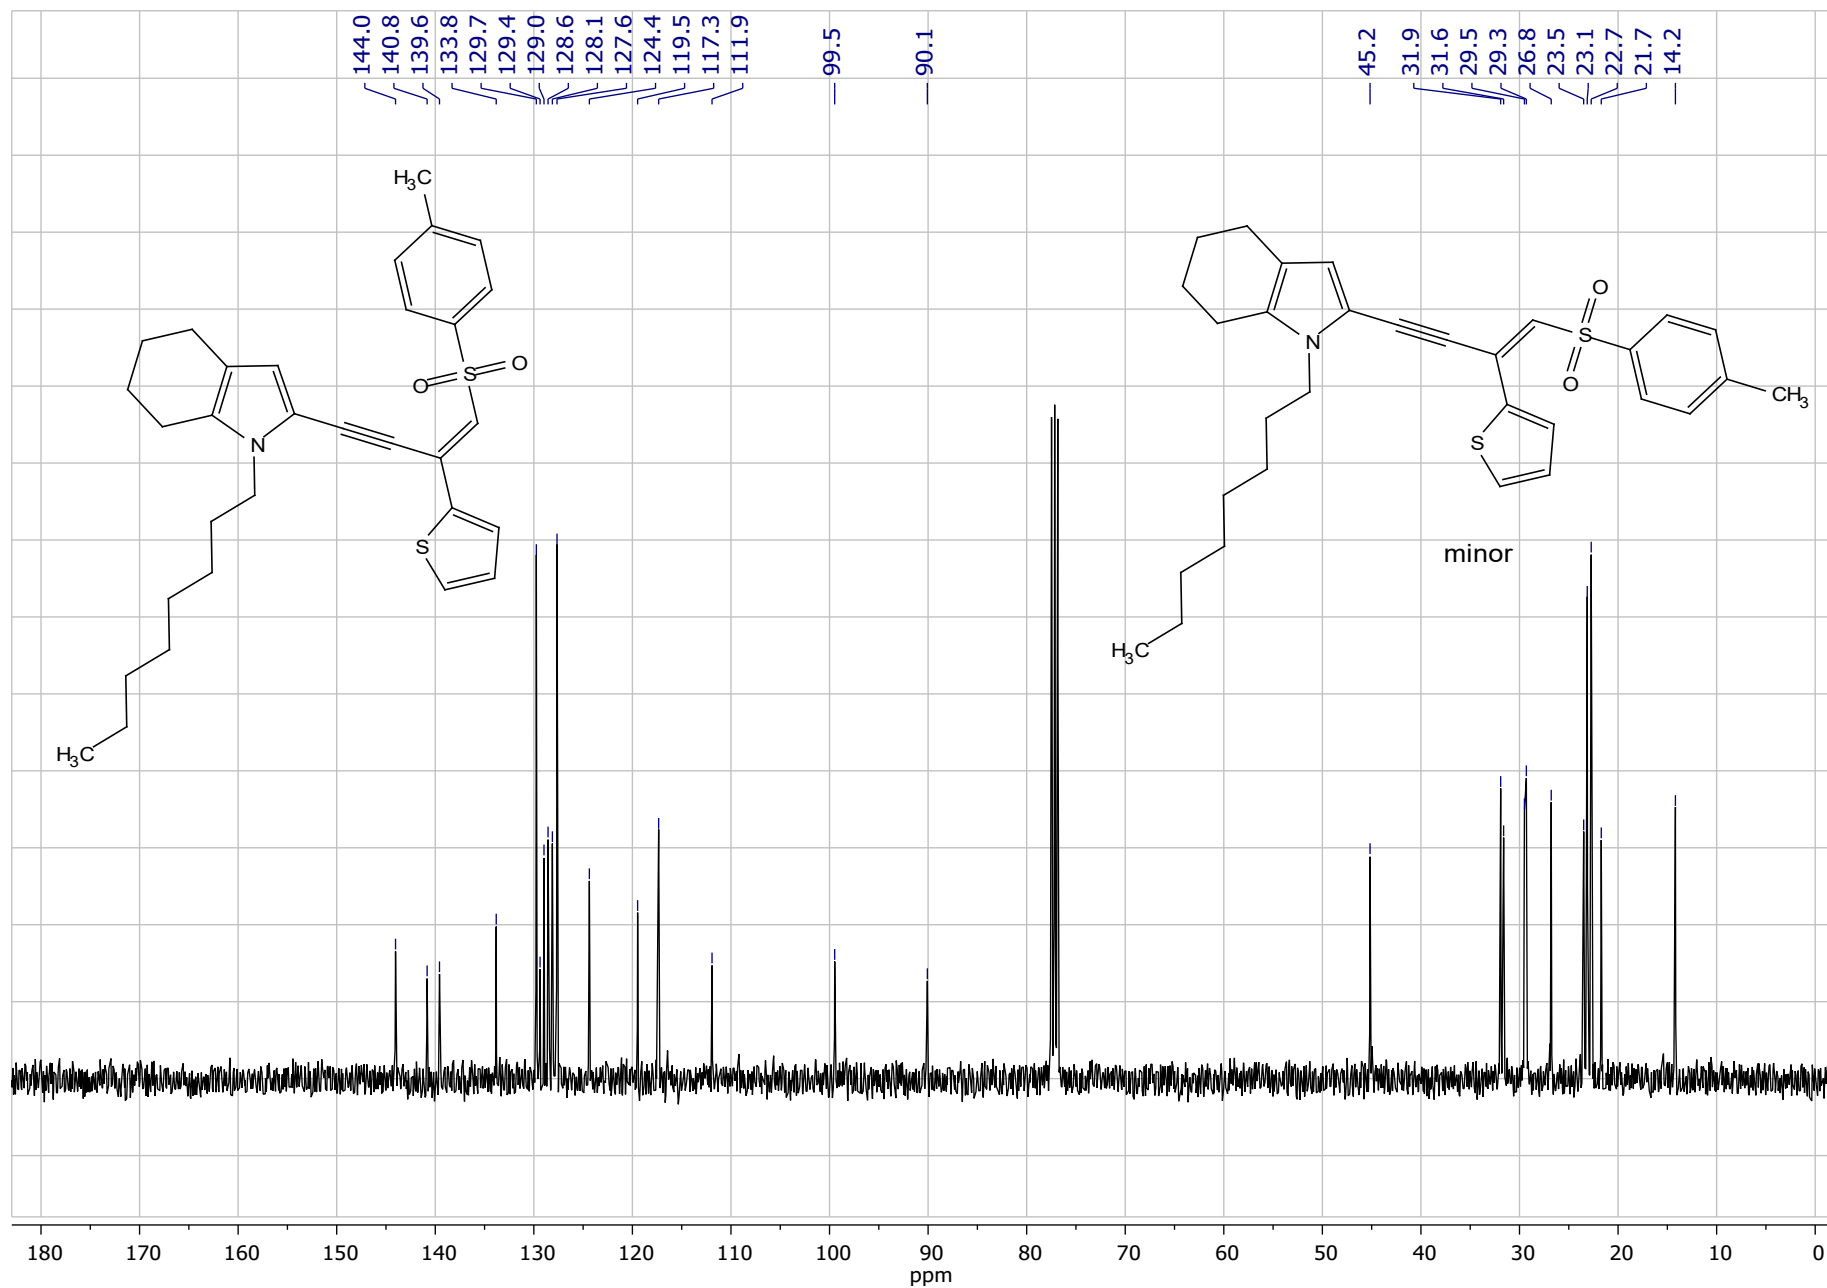

$^1\text{H}$  NMR spectrum of (*Z/E*)-1-benzyl-2-(3-phenyl-4-tosylbut-3-en-1-yn-1-yl)-4,5,6,7-tetrahydro-1*H*-indole (**2j**) in  $\text{CDCl}_3$ .

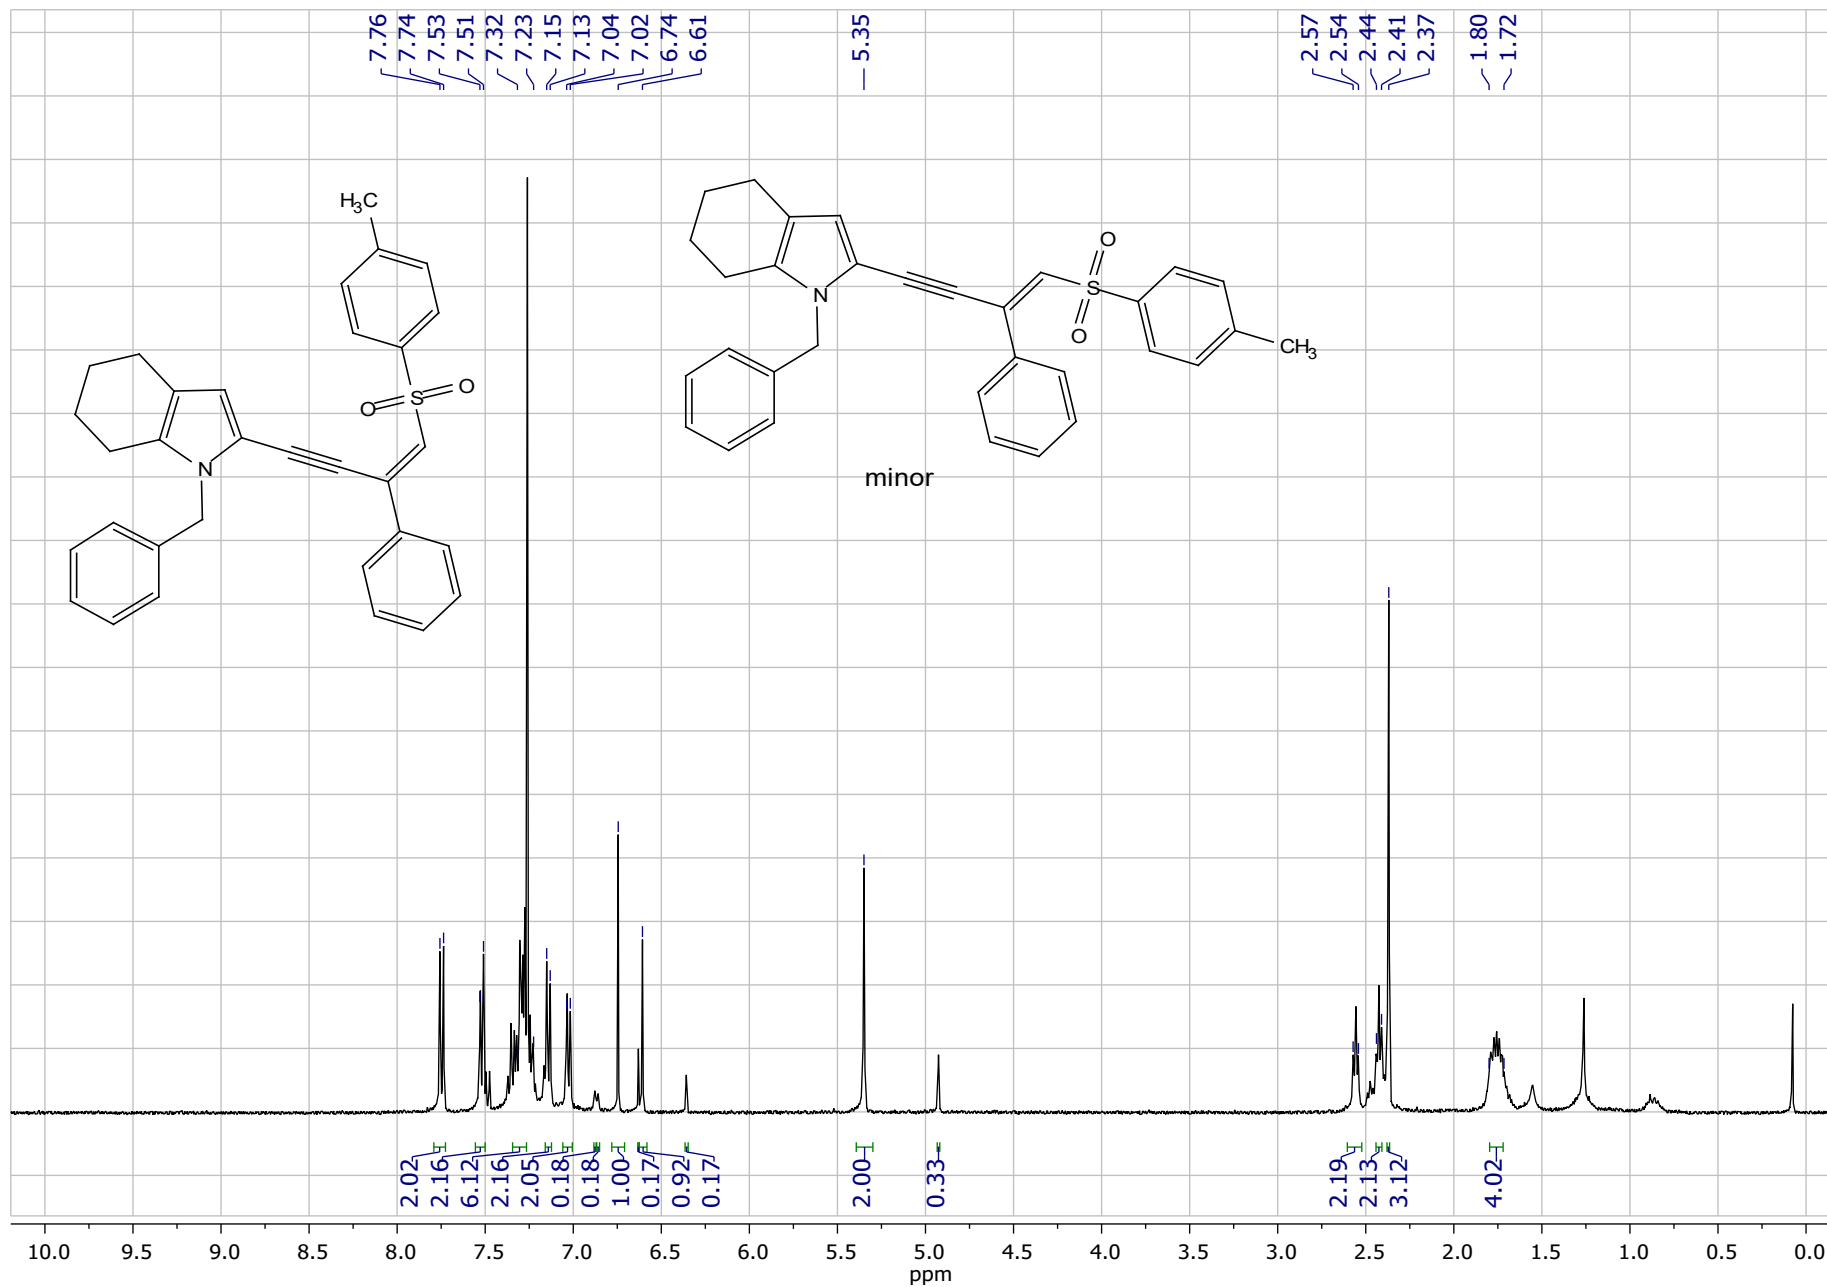

$^{13}\text{C}$  NMR spectrum of (*Z/E*)-1-benzyl-2-(3-phenyl-4-tosylbut-3-en-1-yn-1-yl)-4,5,6,7-tetrahydro-1*H*-indole (**2j**) in  $\text{CDCl}_3$ .

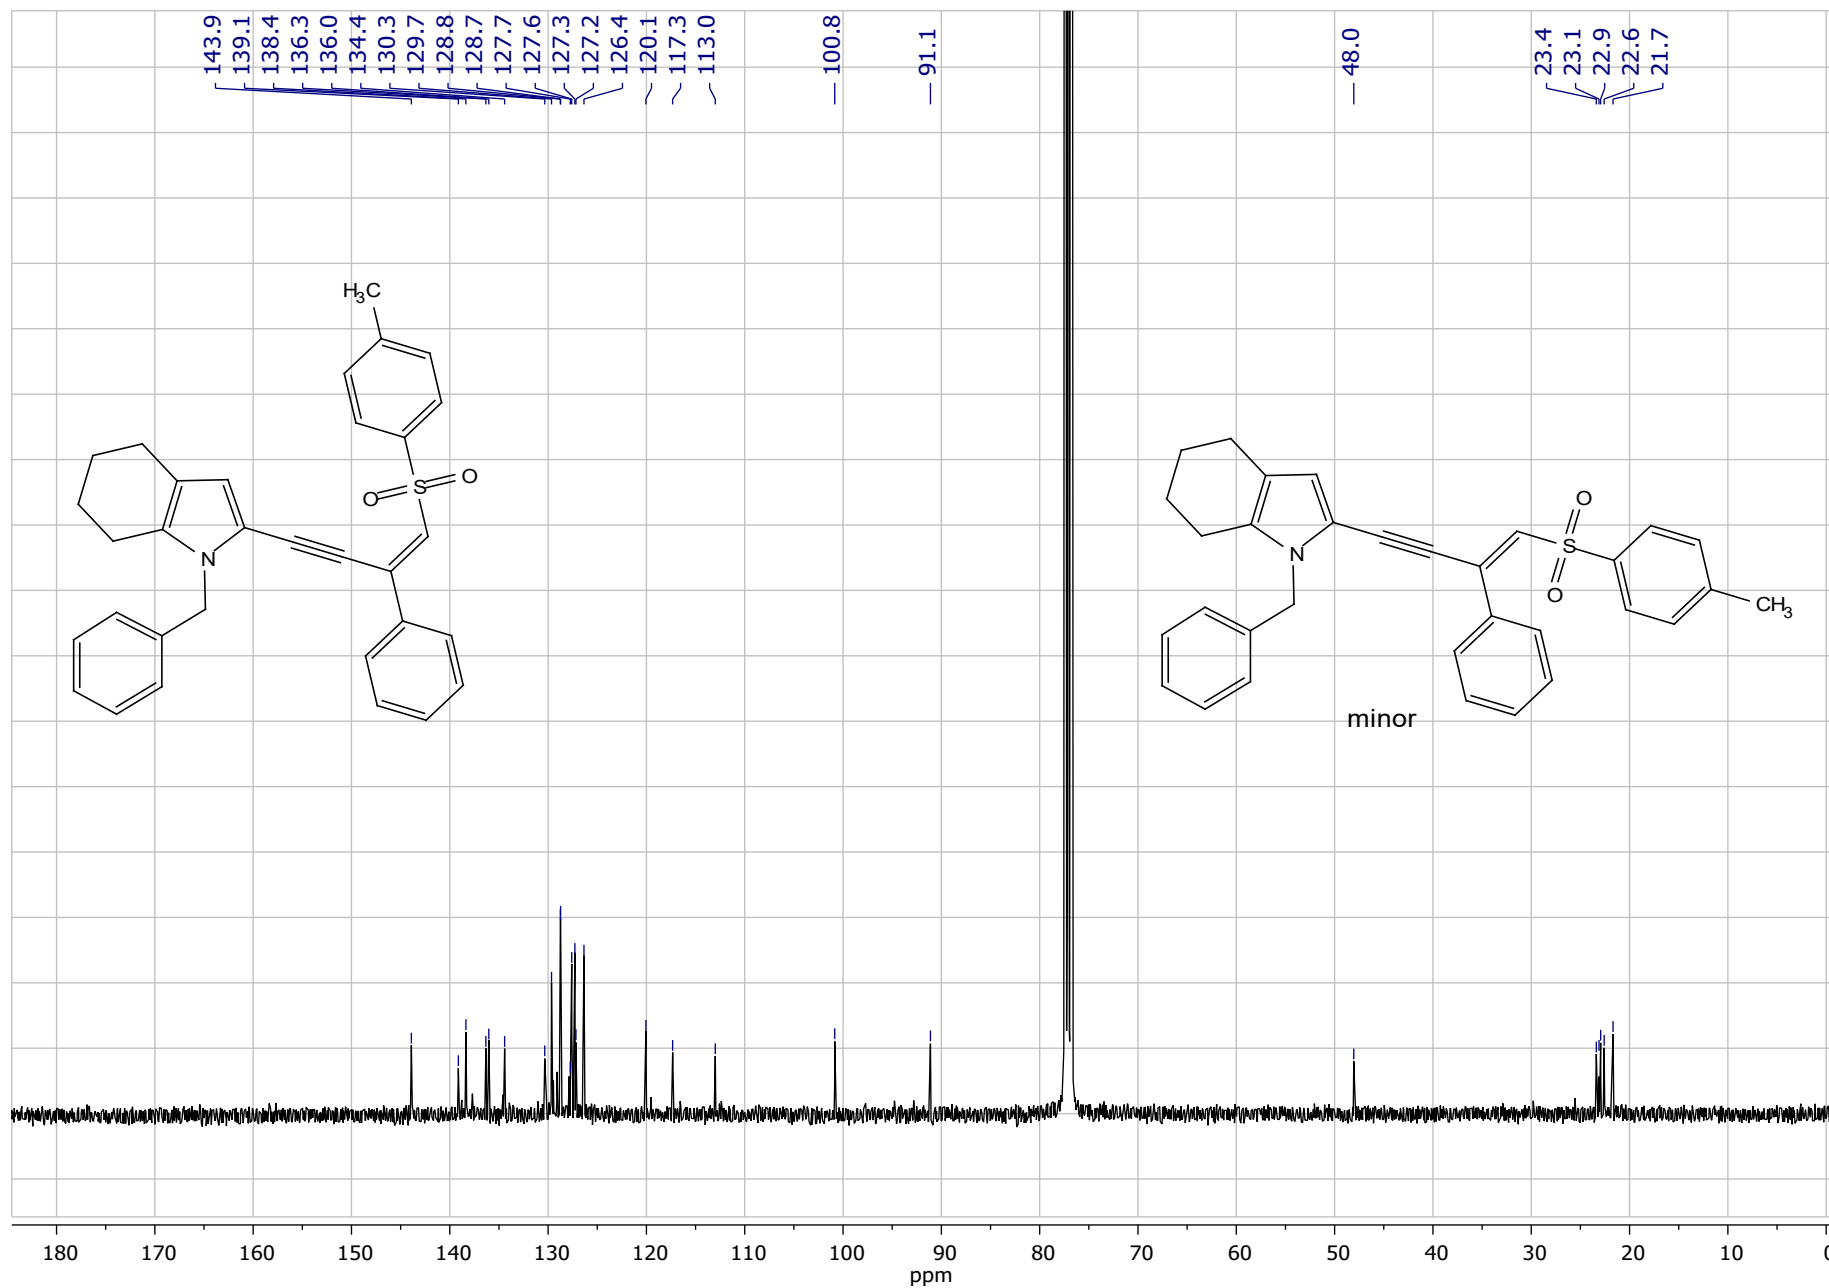



<sup>1</sup>H NMR spectrum of (*E*)-1-benzyl-2-(3-(furan-2-yl)-4-tosylbut-3-en-1-yn-1-yl)-4,5,6,7-tetrahydro-1*H*-indole (**2k**) in CDCl<sub>3</sub>.

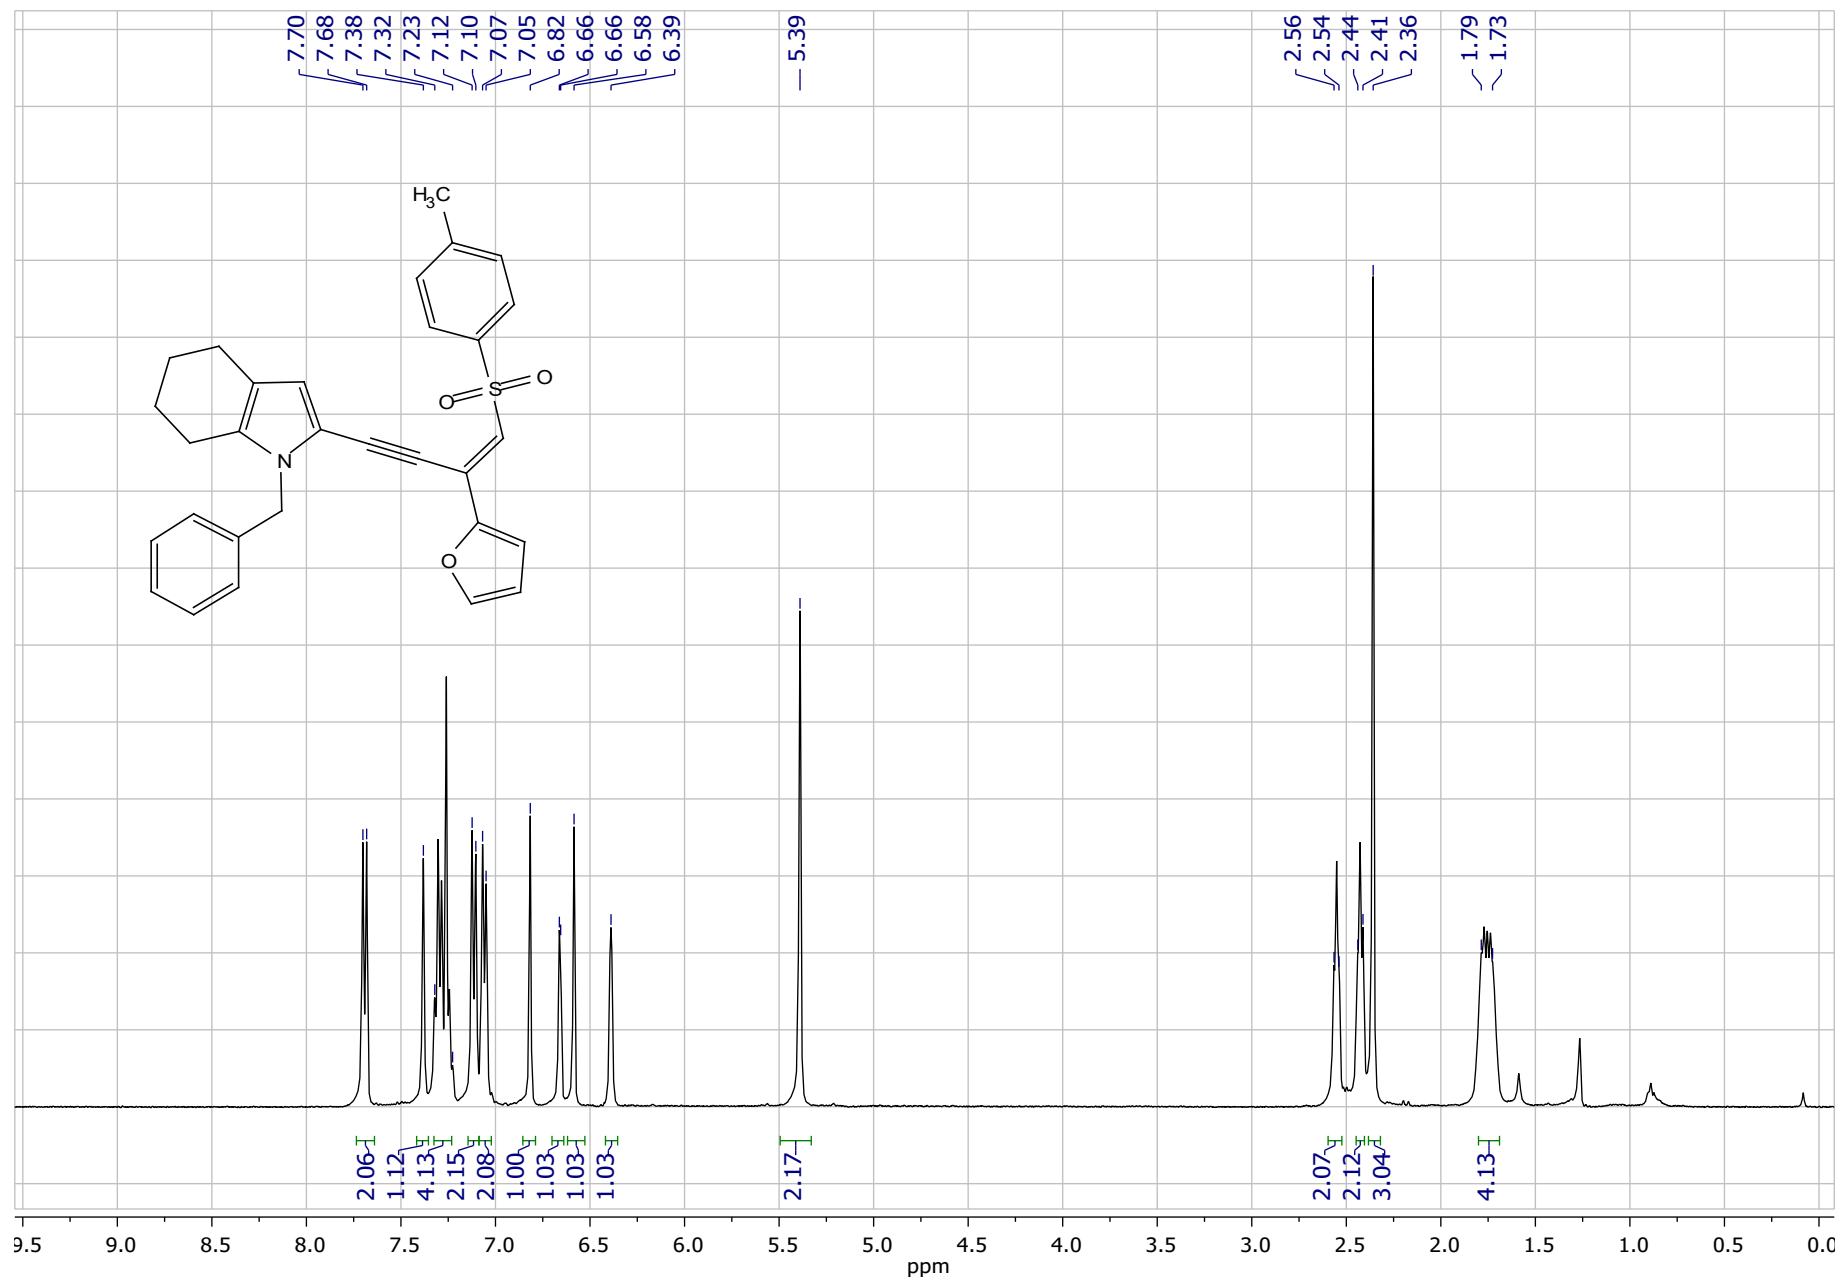

$^{13}\text{C}$  NMR spectrum of (*E*)-1-benzyl-2-(3-(furan-2-yl)-4-tosylbut-3-en-1-yn-1-yl)-4,5,6,7-tetrahydro-1*H*-indole (**2k**) in  $\text{CDCl}_3$ .

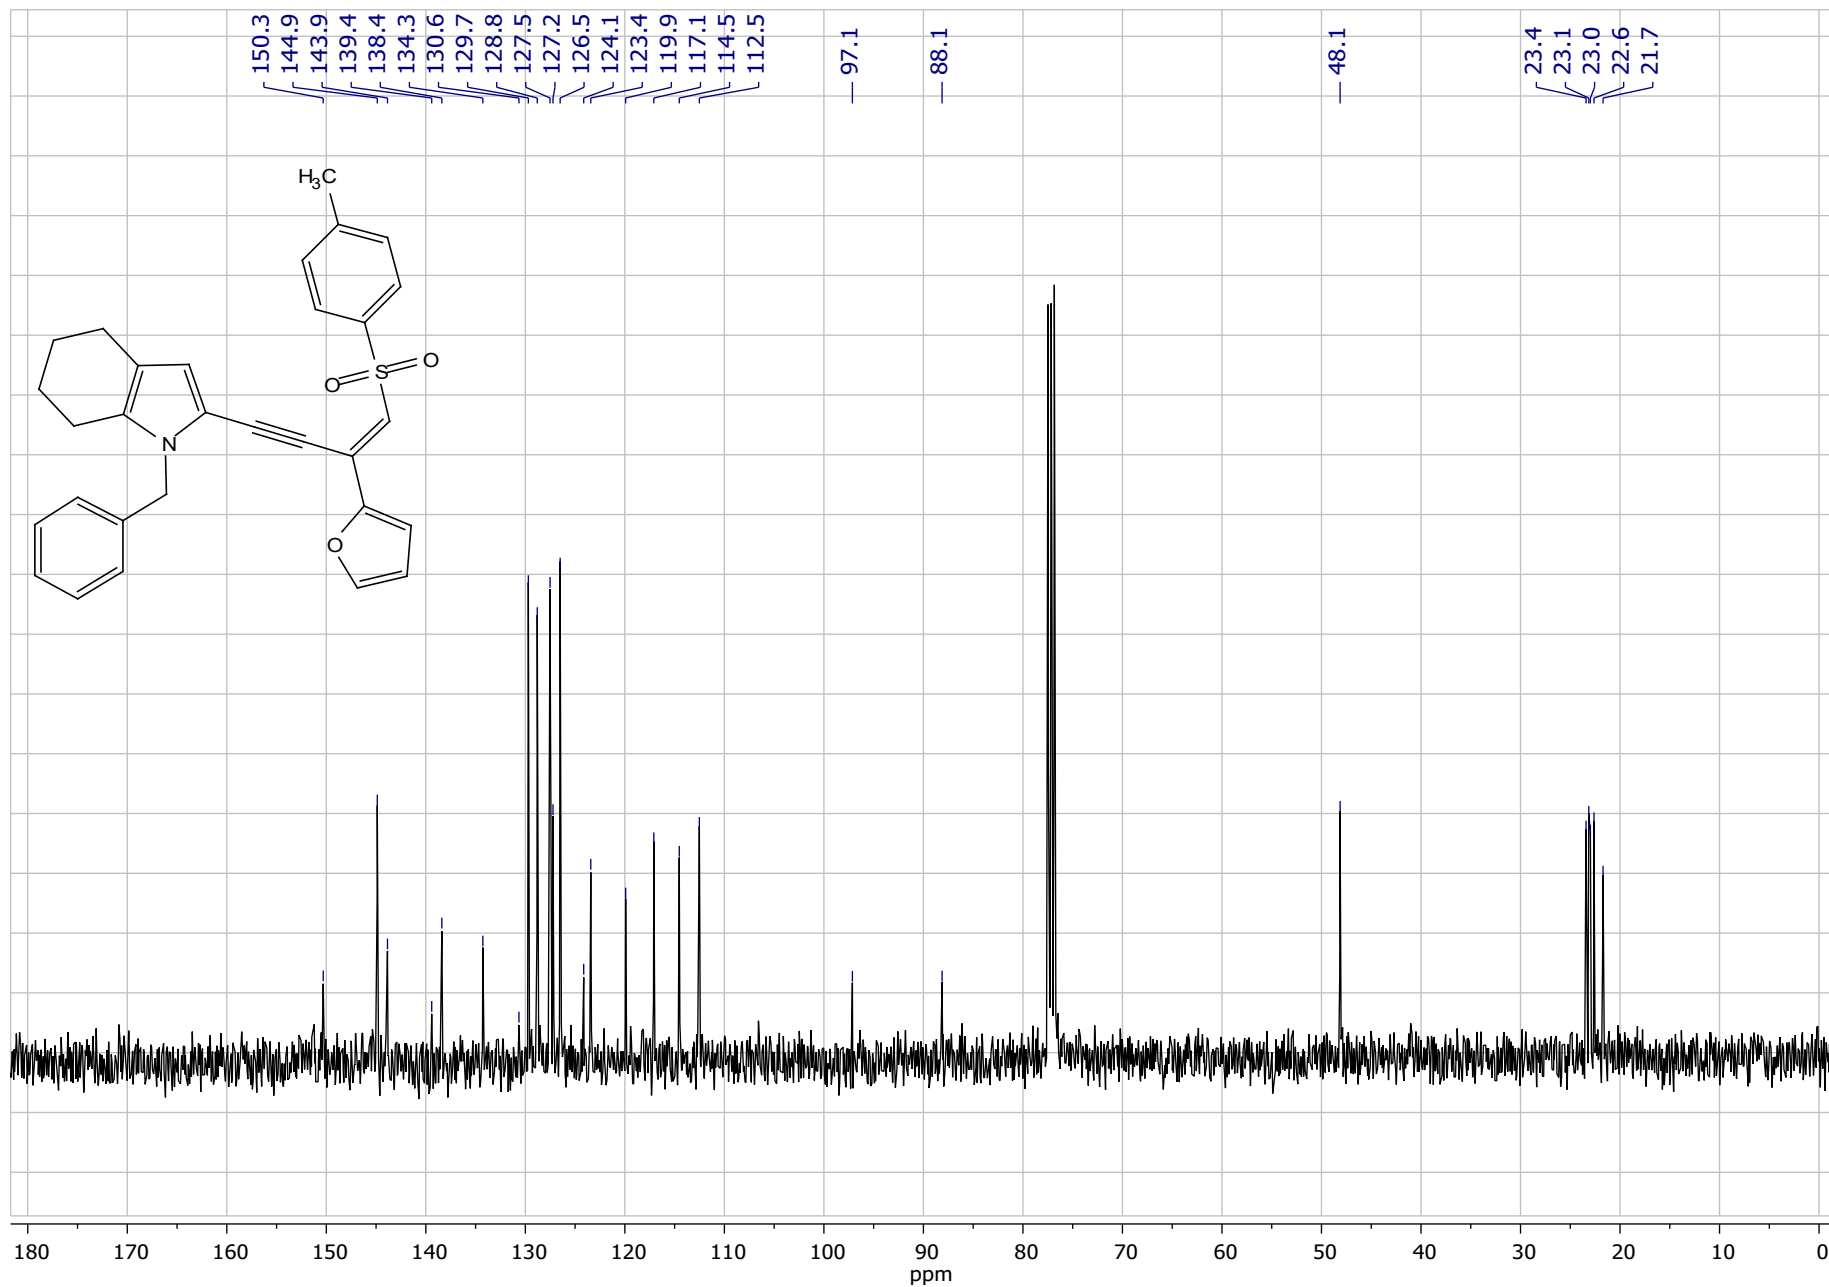

$^1\text{H}$  NMR spectrum of (*E*)-1-benzyl-2-(3-(thiophen-2-yl)-4-tosylbut-3-en-1-yn-1-yl)-4,5,6,7-tetrahydro-1*H*-indole (**21**) in  $\text{CDCl}_3$ .

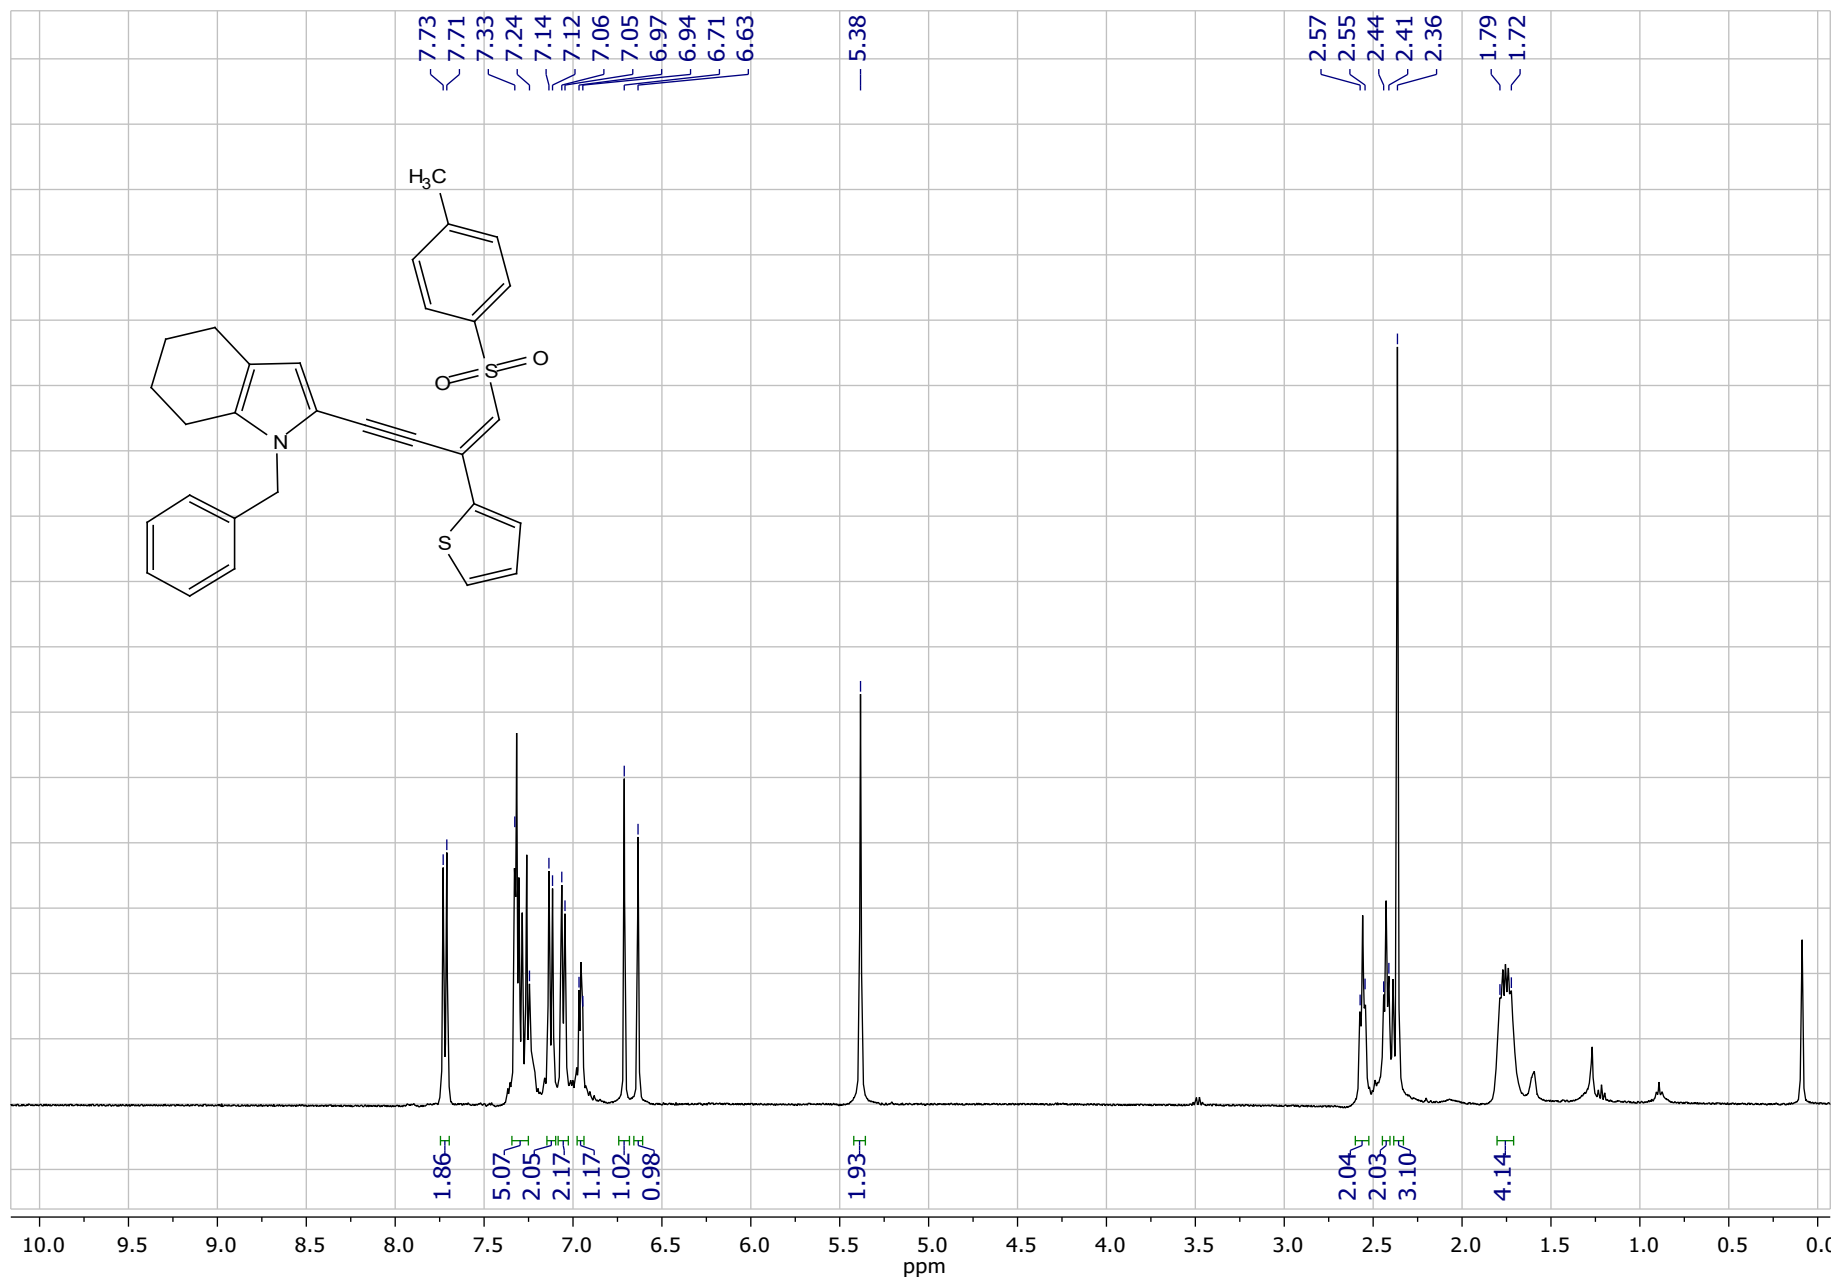

$^{13}\text{C}$  NMR spectrum of (*E*)-1-benzyl-2-(3-(thiophen-2-yl)-4-tosylbut-3-en-1-yn-1-yl)-4,5,6,7-tetrahydro-1*H*-indole (**2I**) in  $\text{CDCl}_3$ .

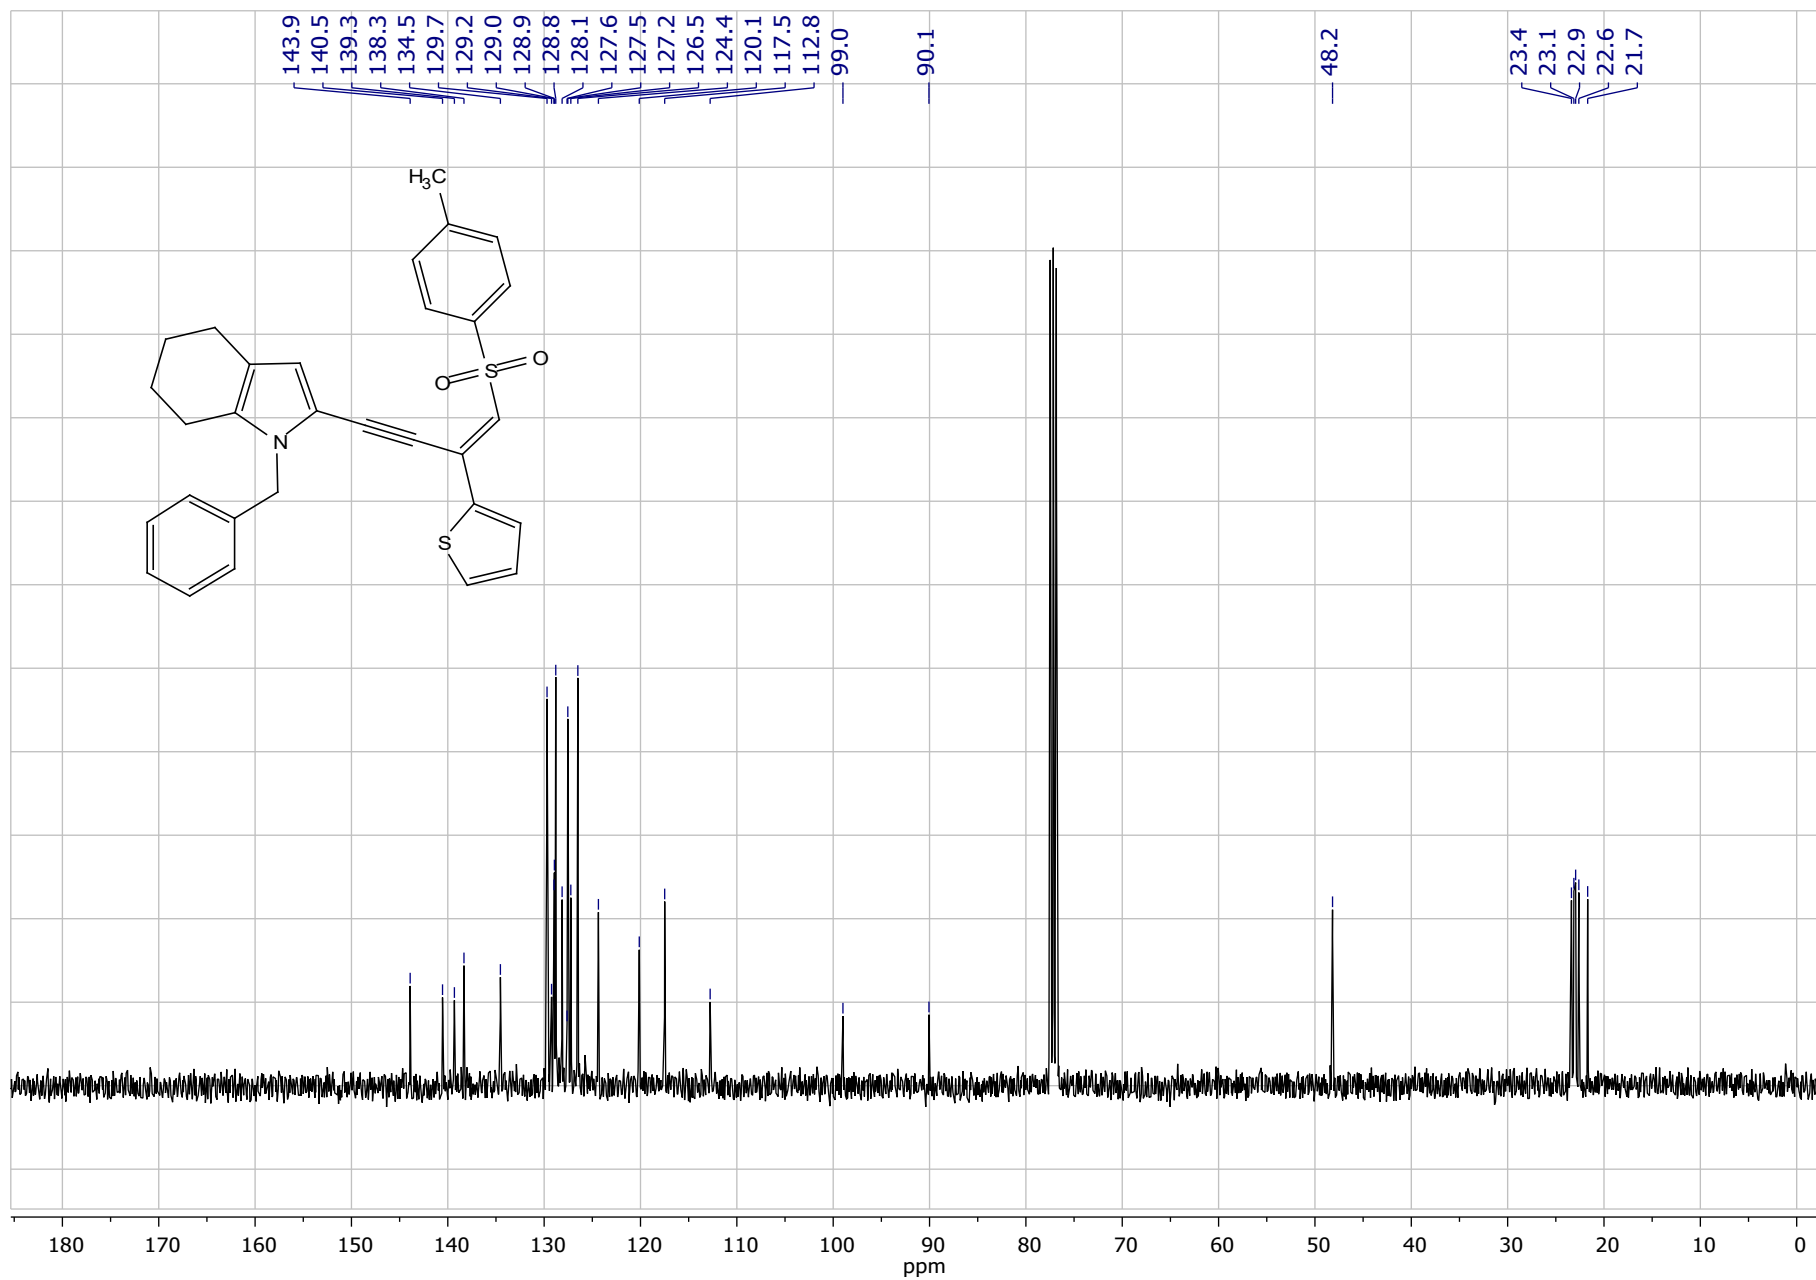

<sup>1</sup>H NMR spectrum of (Z)-2-(3-phenyl-4-tosylbut-3-en-1-yn-1-yl)-1-vinyl-4,5,6,7-tetrahydro-1H-indole (**2m**) in CDCl<sub>3</sub>.

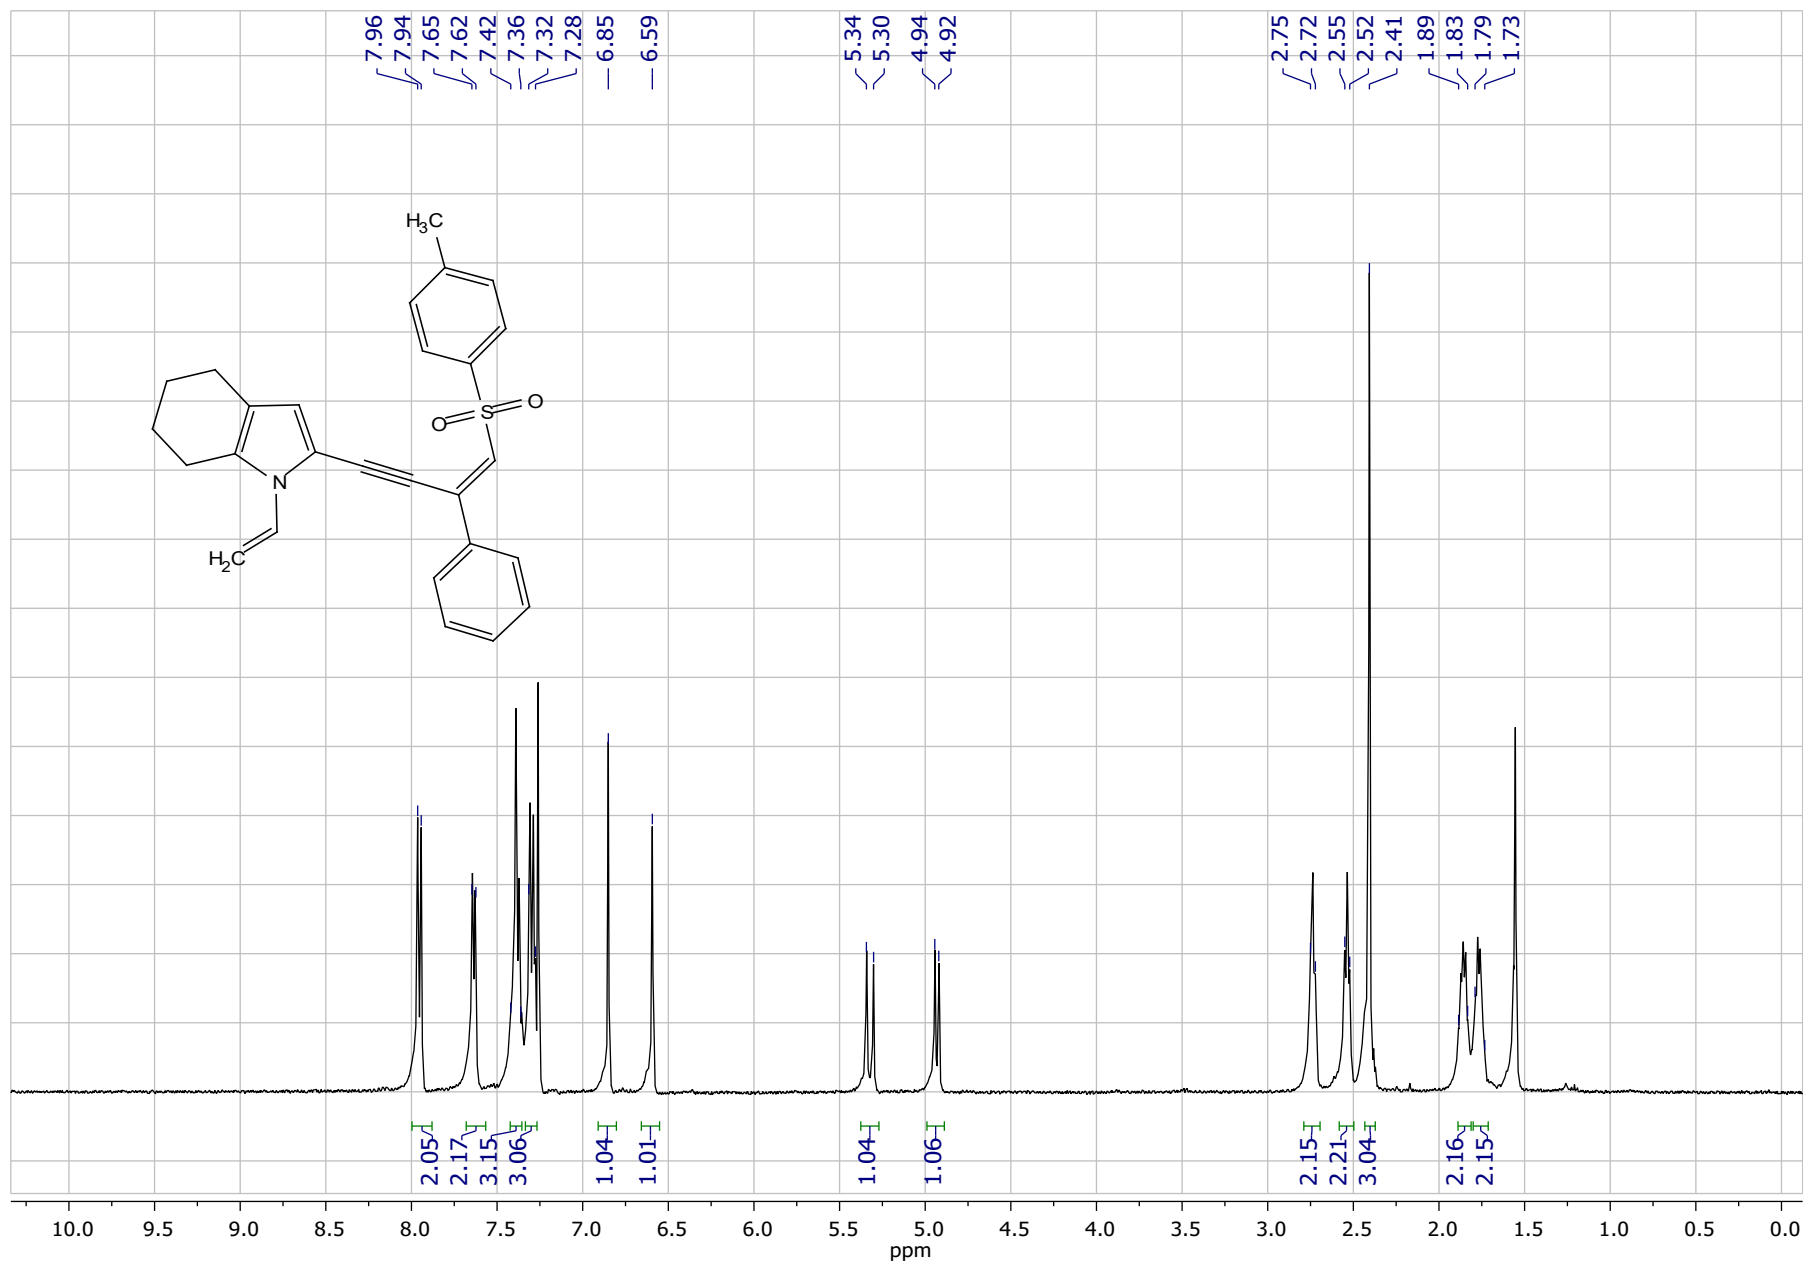

$^{13}\text{C}$  NMR spectrum of (*Z*)-2-(3-phenyl-4-tosylbut-3-en-1-yn-1-yl)-1-vinyl-4,5,6,7-tetrahydro-1*H*-indole (**2m**) in  $\text{CDCl}_3$ .

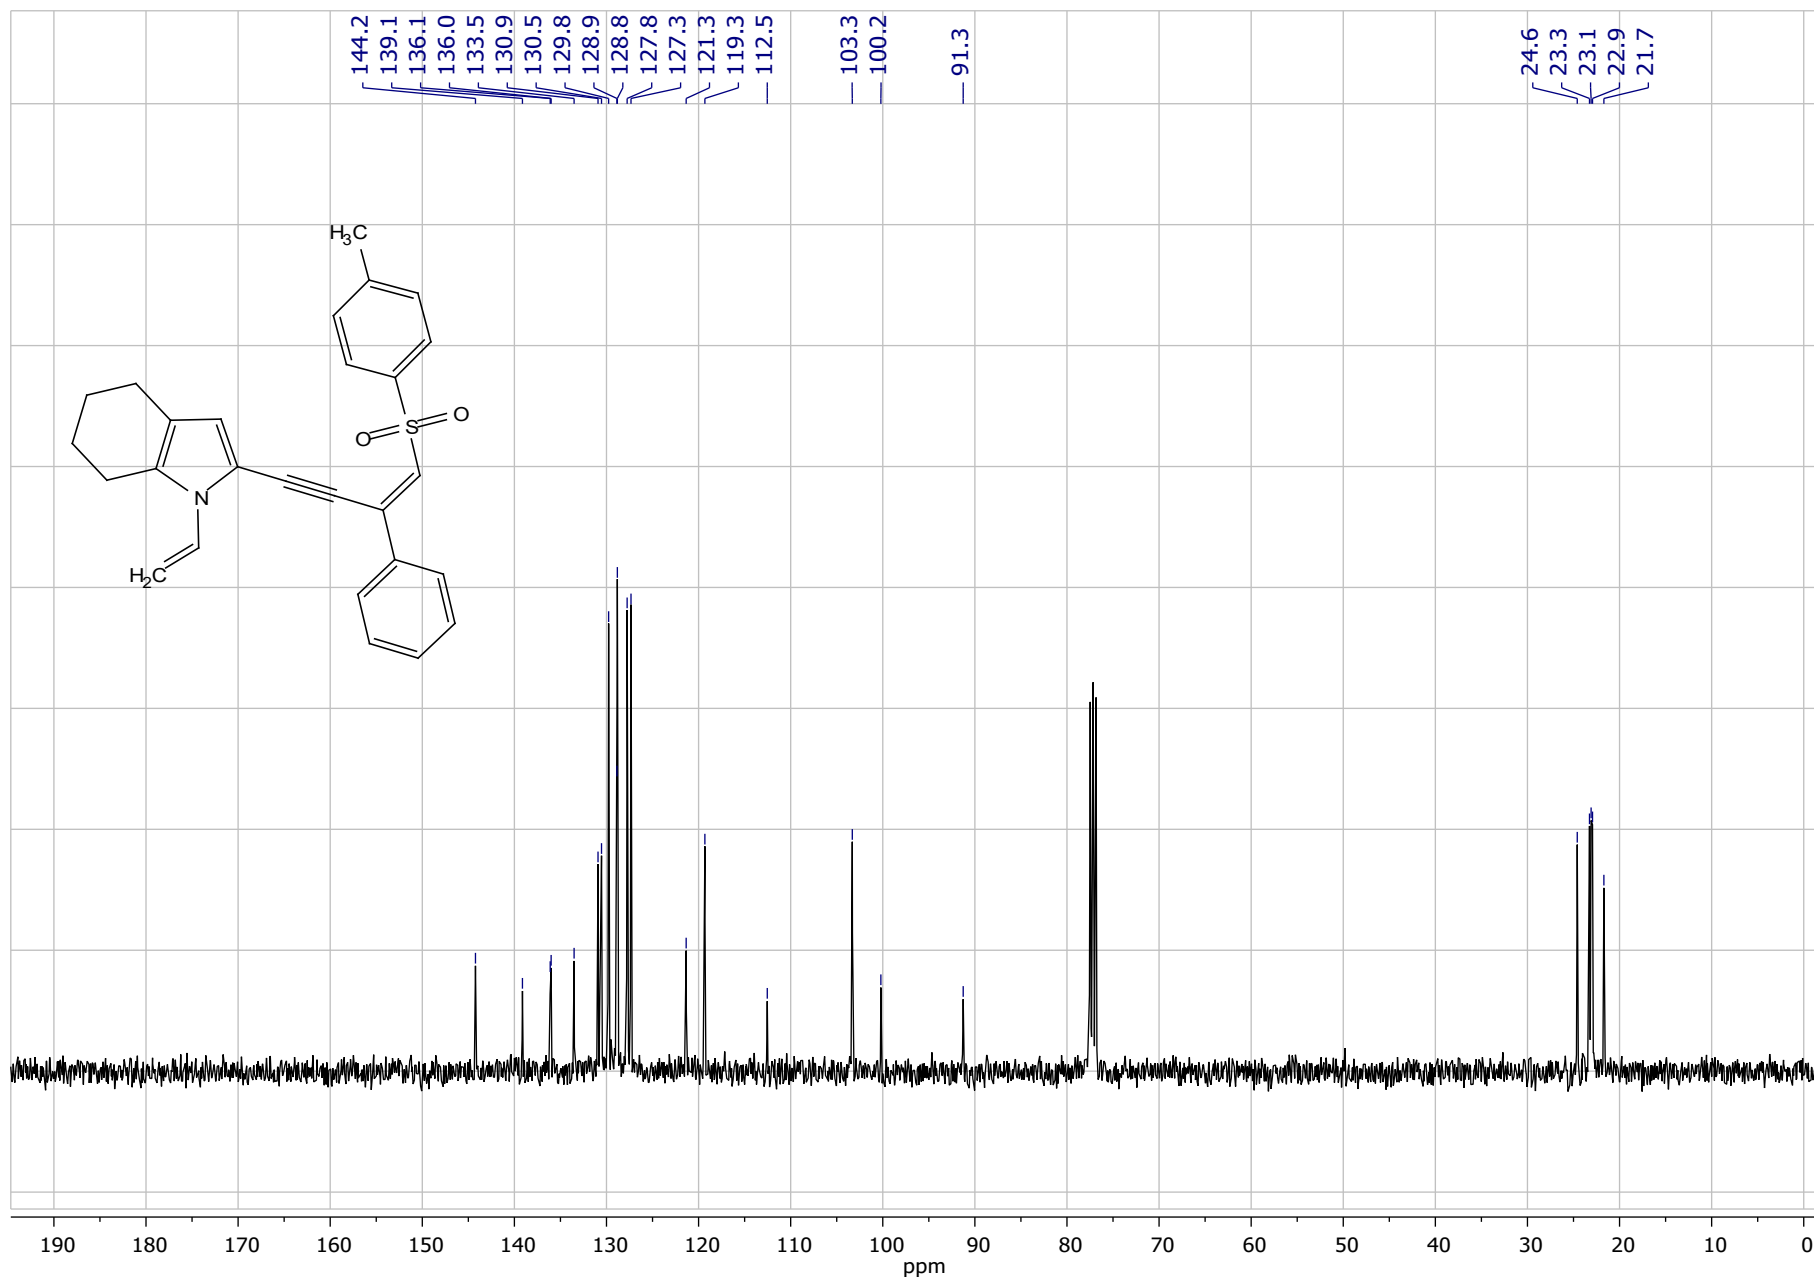

<sup>1</sup>H NMR spectrum of (Z)-(4-tosylbut-3-en-1-yne-1,3-diyl)dibenzene (**2n**) in CDCl<sub>3</sub>.

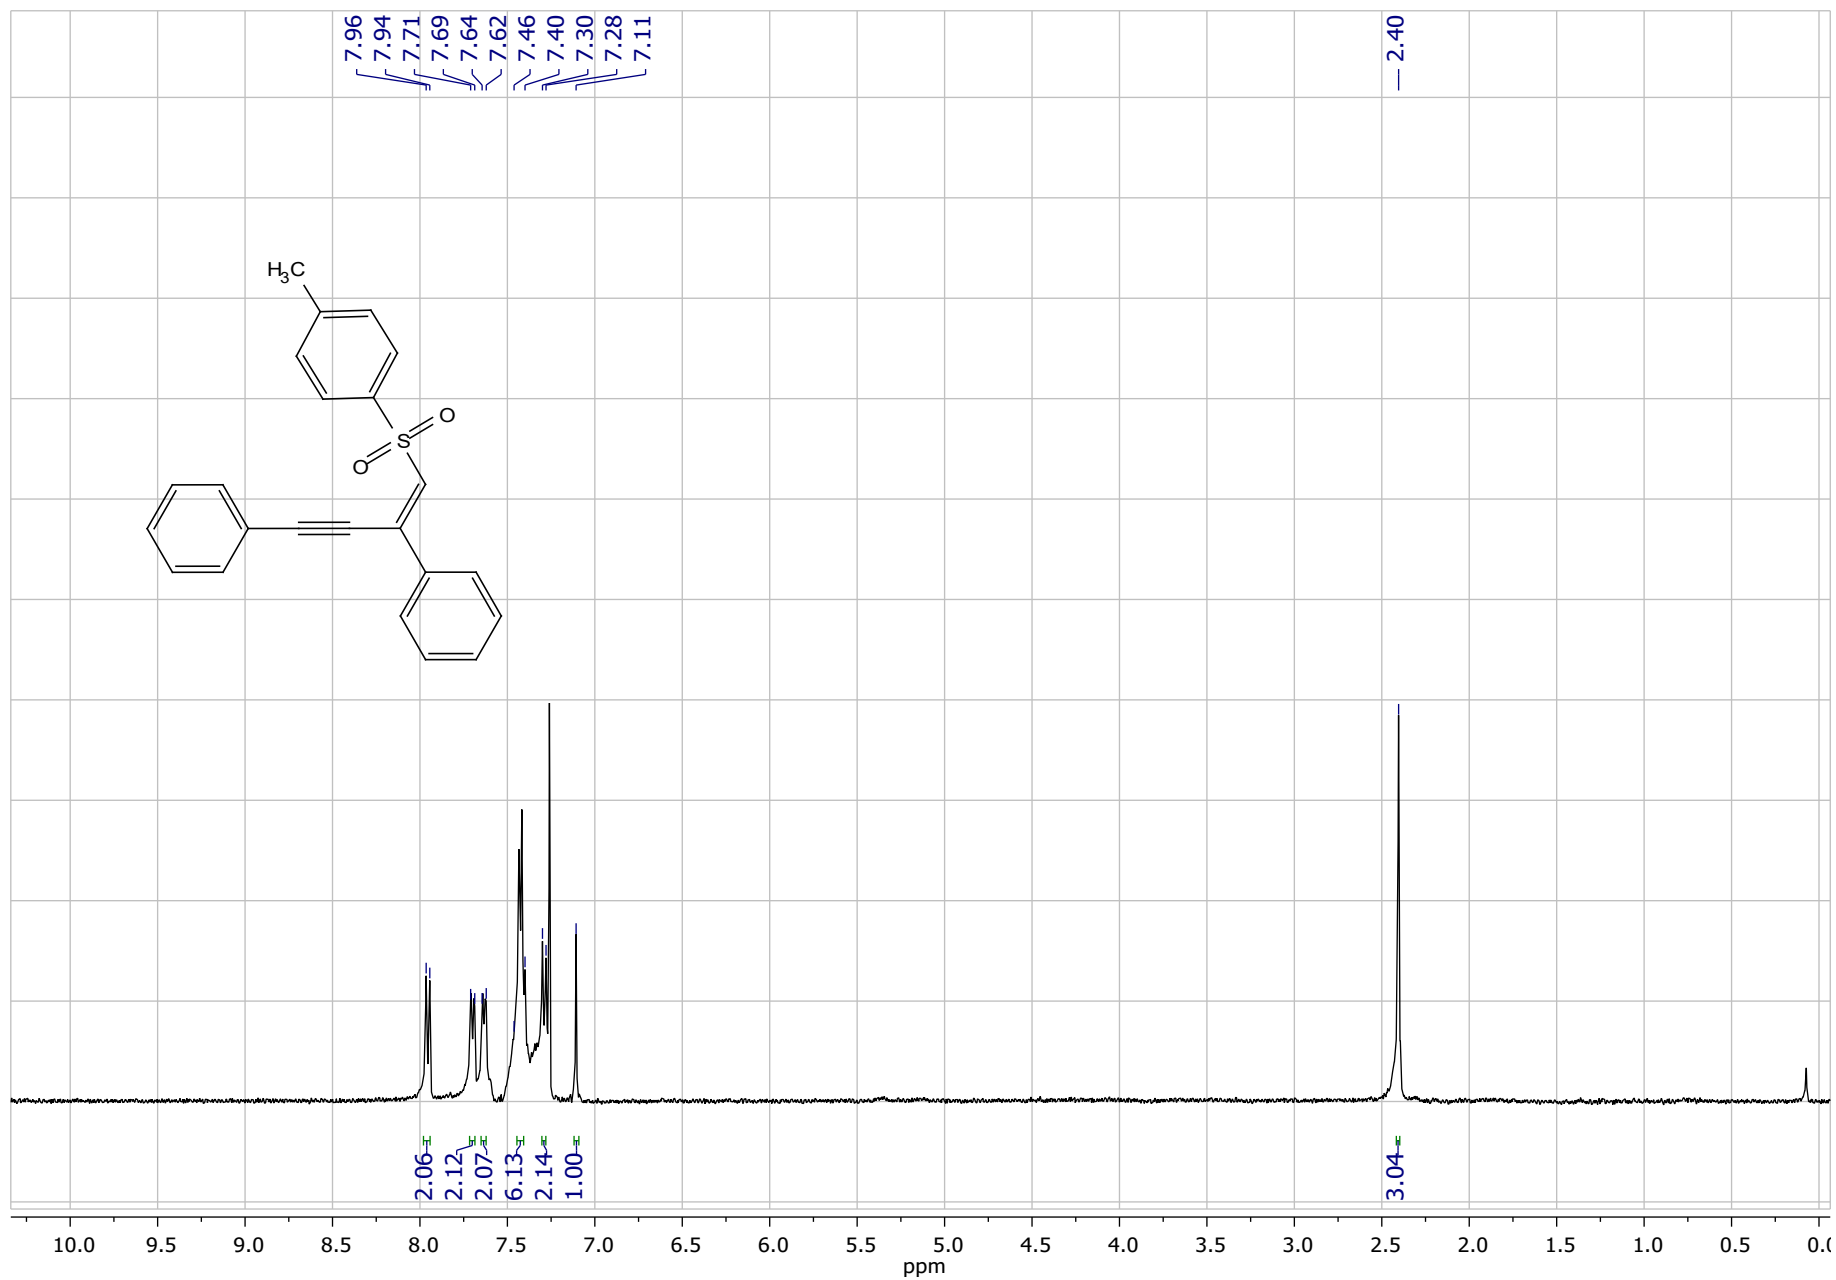

$^{13}\text{C}$  NMR spectrum of (*Z*)-(4-tosylbut-3-en-1-yne-1,3-diyl)dibenzene (**2n**) in  $\text{CDCl}_3$ .

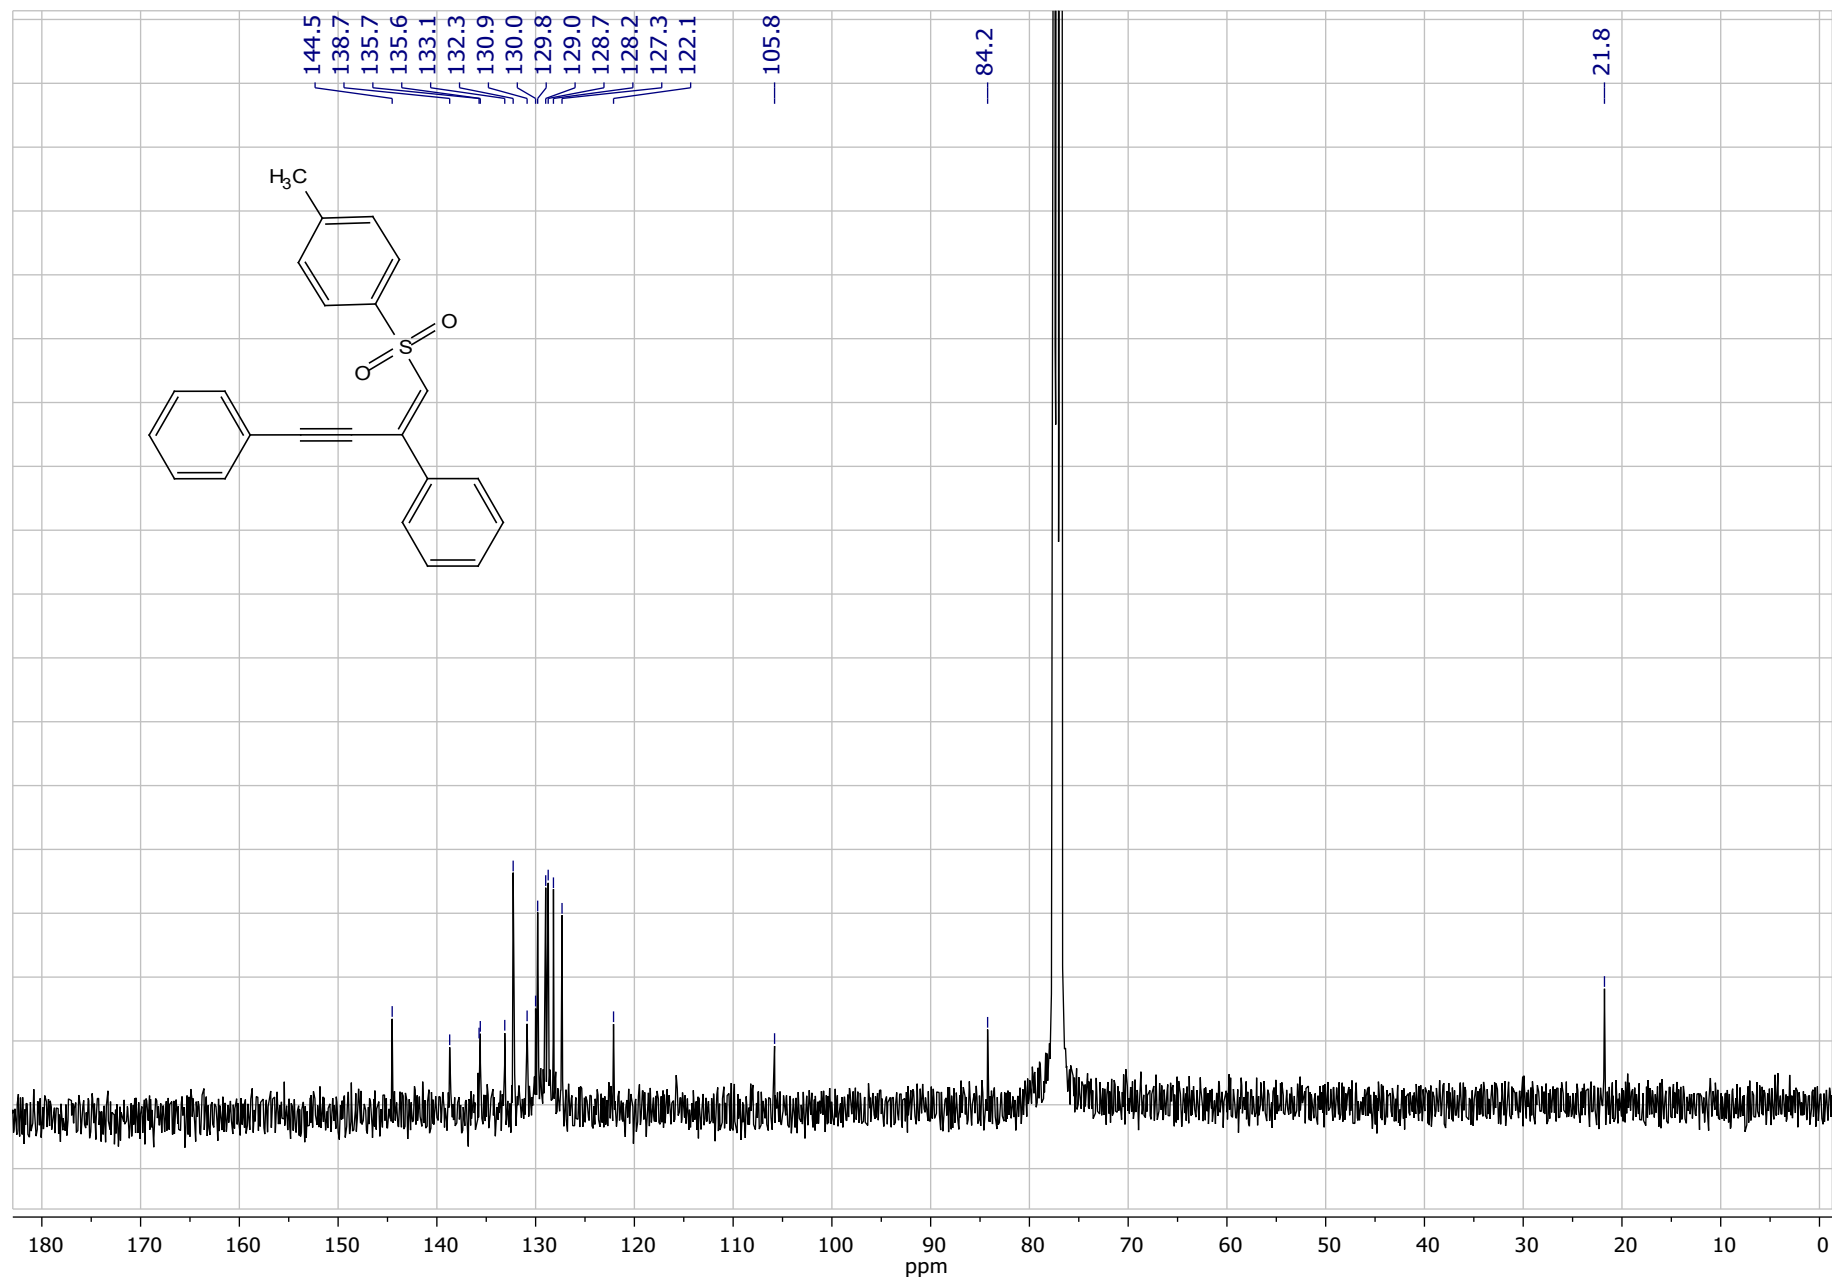



<sup>1</sup>H NMR spectrum of (*E*)-2-(4-phenyl-1-tosylbut-1-en-3-yn-2-yl)furan (**2o**) in CDCl<sub>3</sub>.

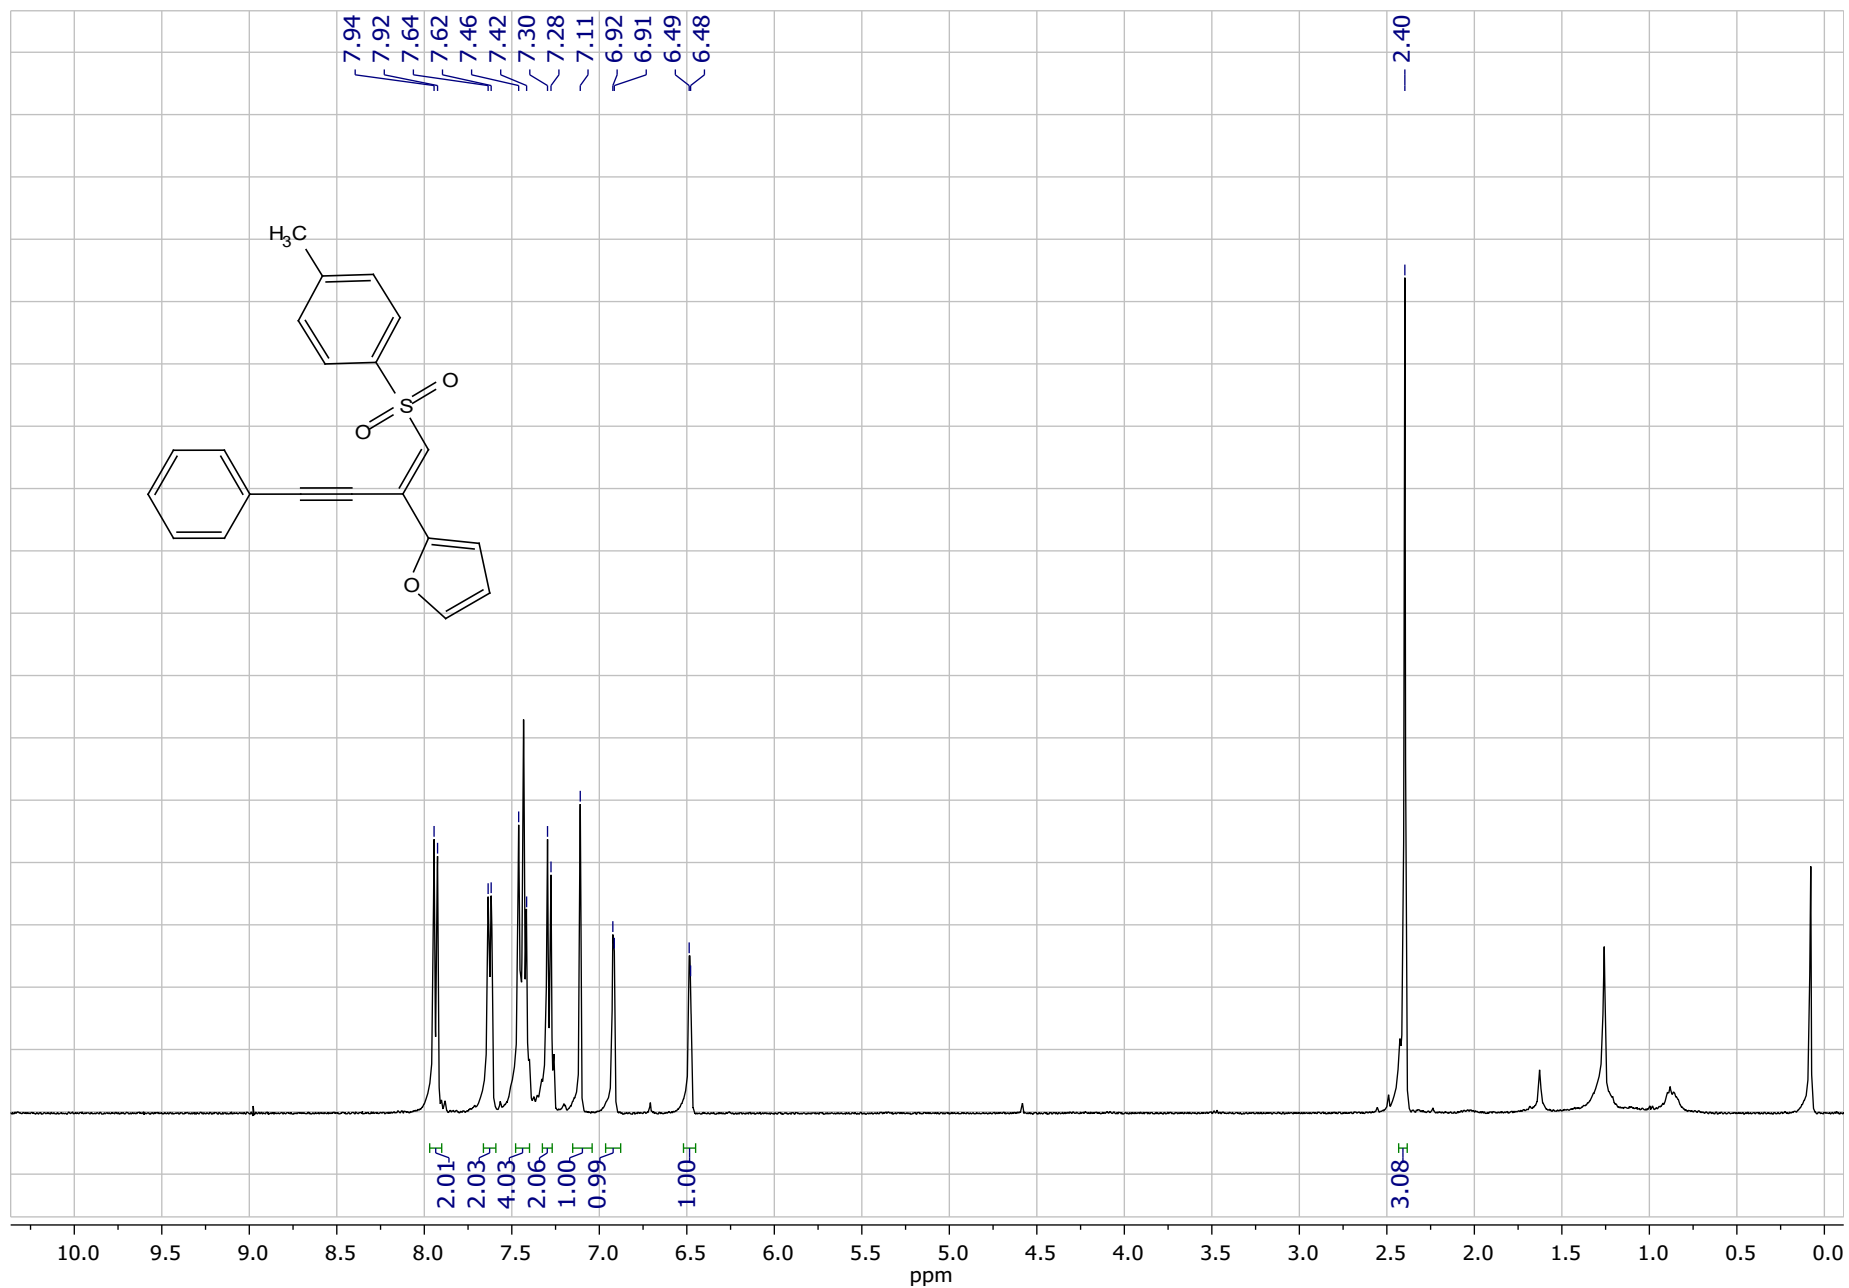

$^{13}\text{C}$  NMR spectrum of (*E*)-2-(4-phenyl-1-tosylbut-1-en-3-yn-2-yl)furan (**2o**) in  $\text{CDCl}_3$ .

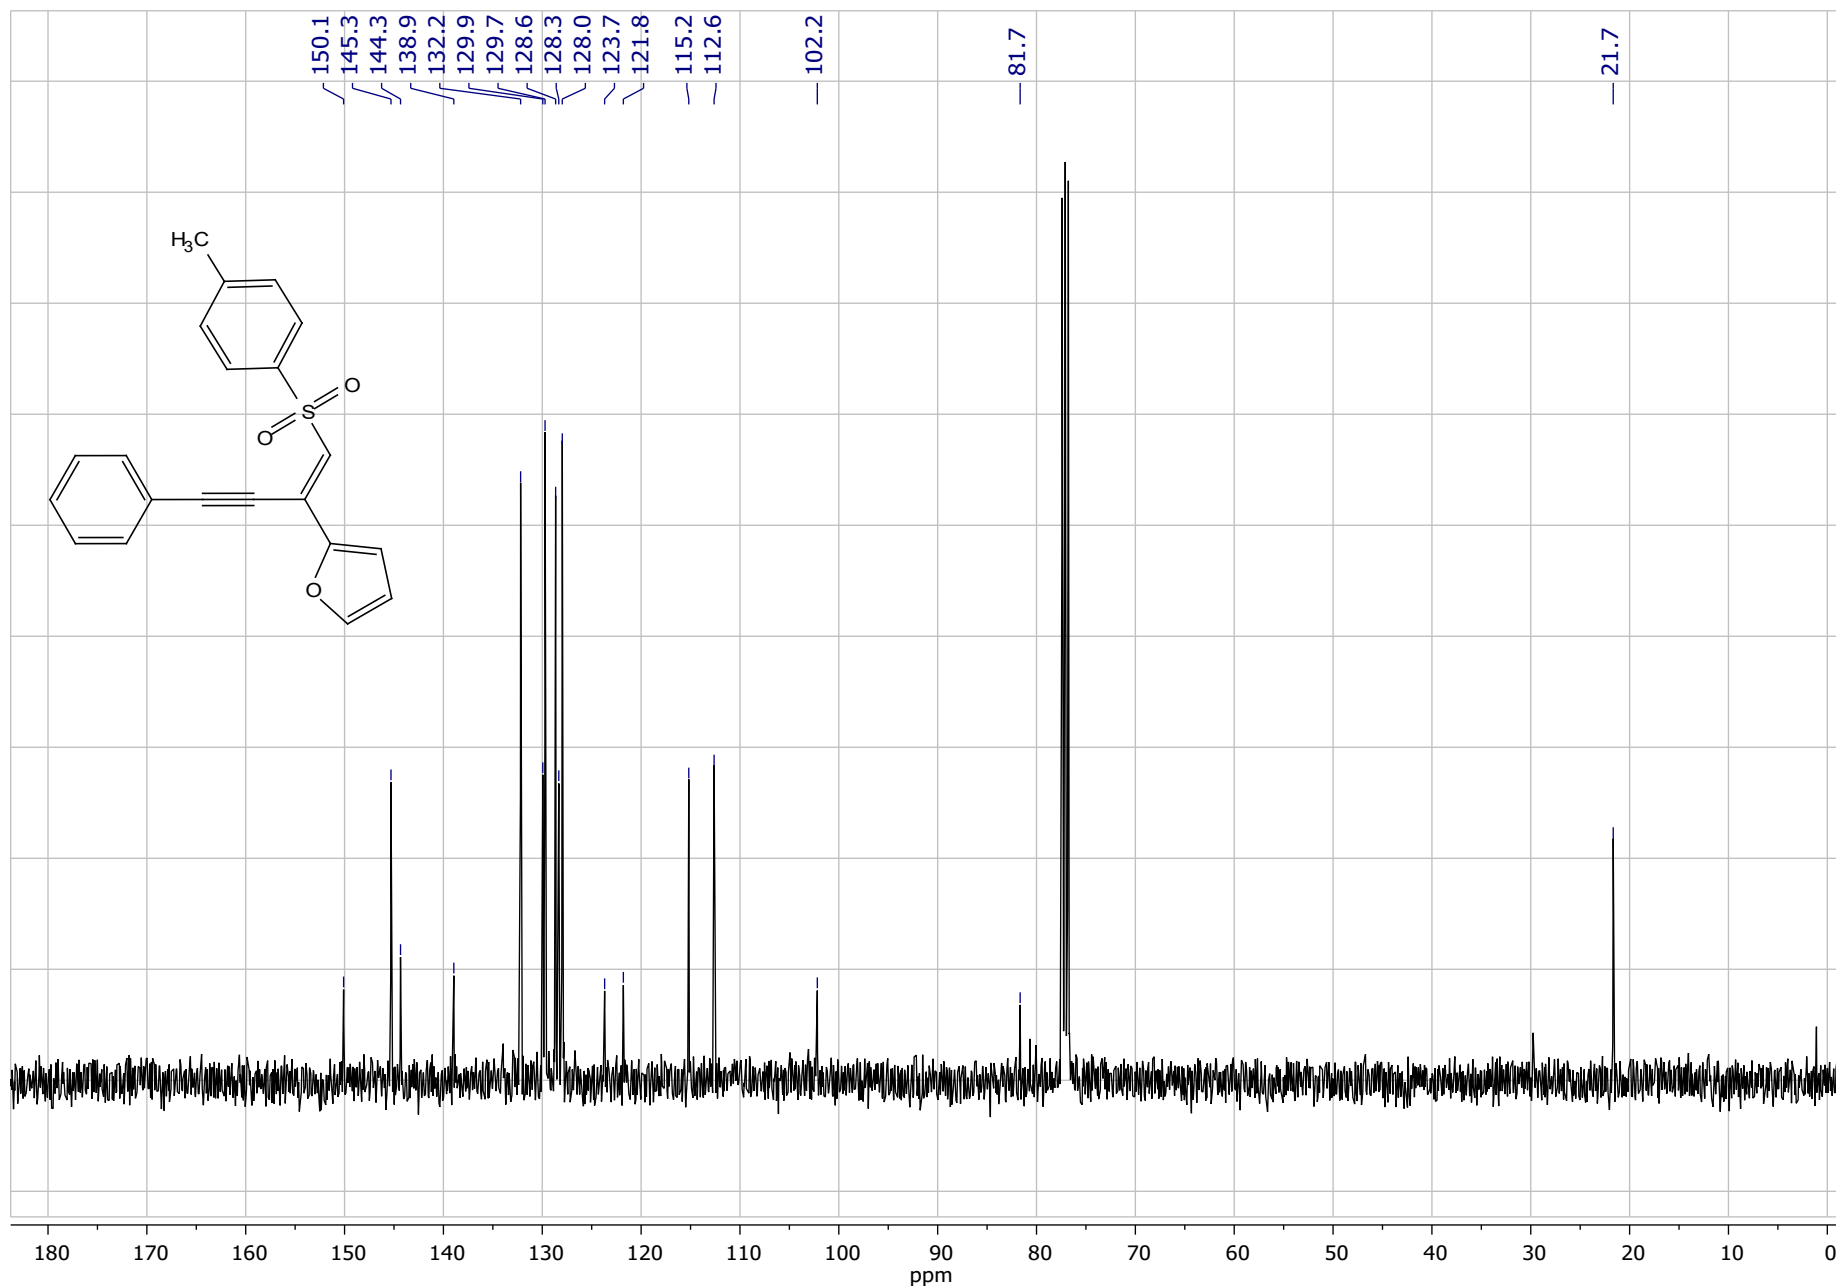

$^1\text{H}$  NMR spectrum of (*E*)-*N*-(2-methyl-4-(1-methyl-1*H*-pyrrol-2-yl)-1-tosylbut-1-en-3-yn-1-yl)formamide (**3a**) and (*Z*)-*N*-((*E*)-2-methyl-4-(1-methyl-1*H*-pyrrol-2-yl)-1-tosylbut-1-en-3-yn-1-yl)formimidic acid (**3b**) in  $\text{CDCl}_3$ .

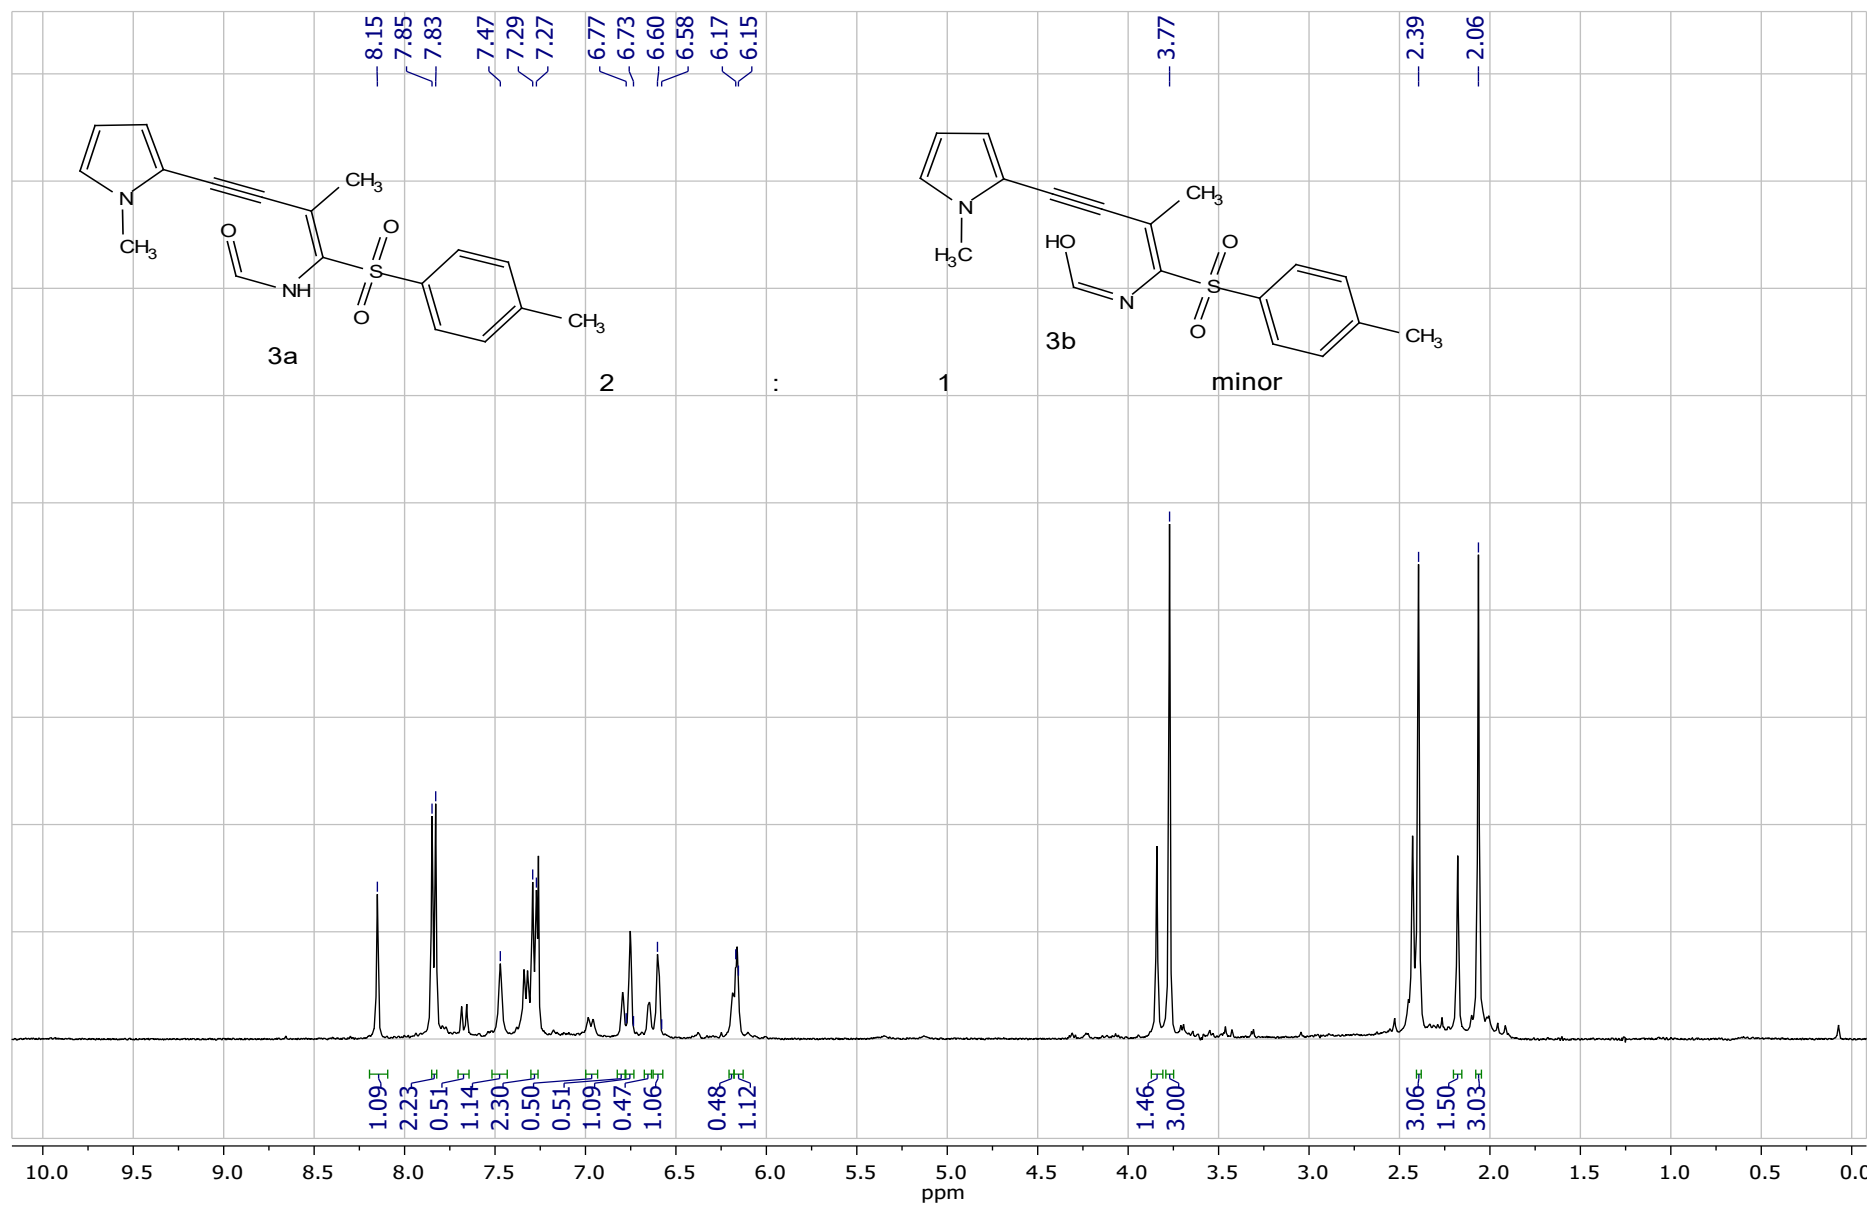

$^{13}\text{C}$  NMR spectrum of (*E*)-*N*-(2-methyl-4-(1-methyl-1*H*-pyrrol-2-yl)-1-tosylbut-1-en-3-yn-1-yl)formamide (**3a**) (in the mixture of **3a** and **3b**) in  $\text{CDCl}_3$ .

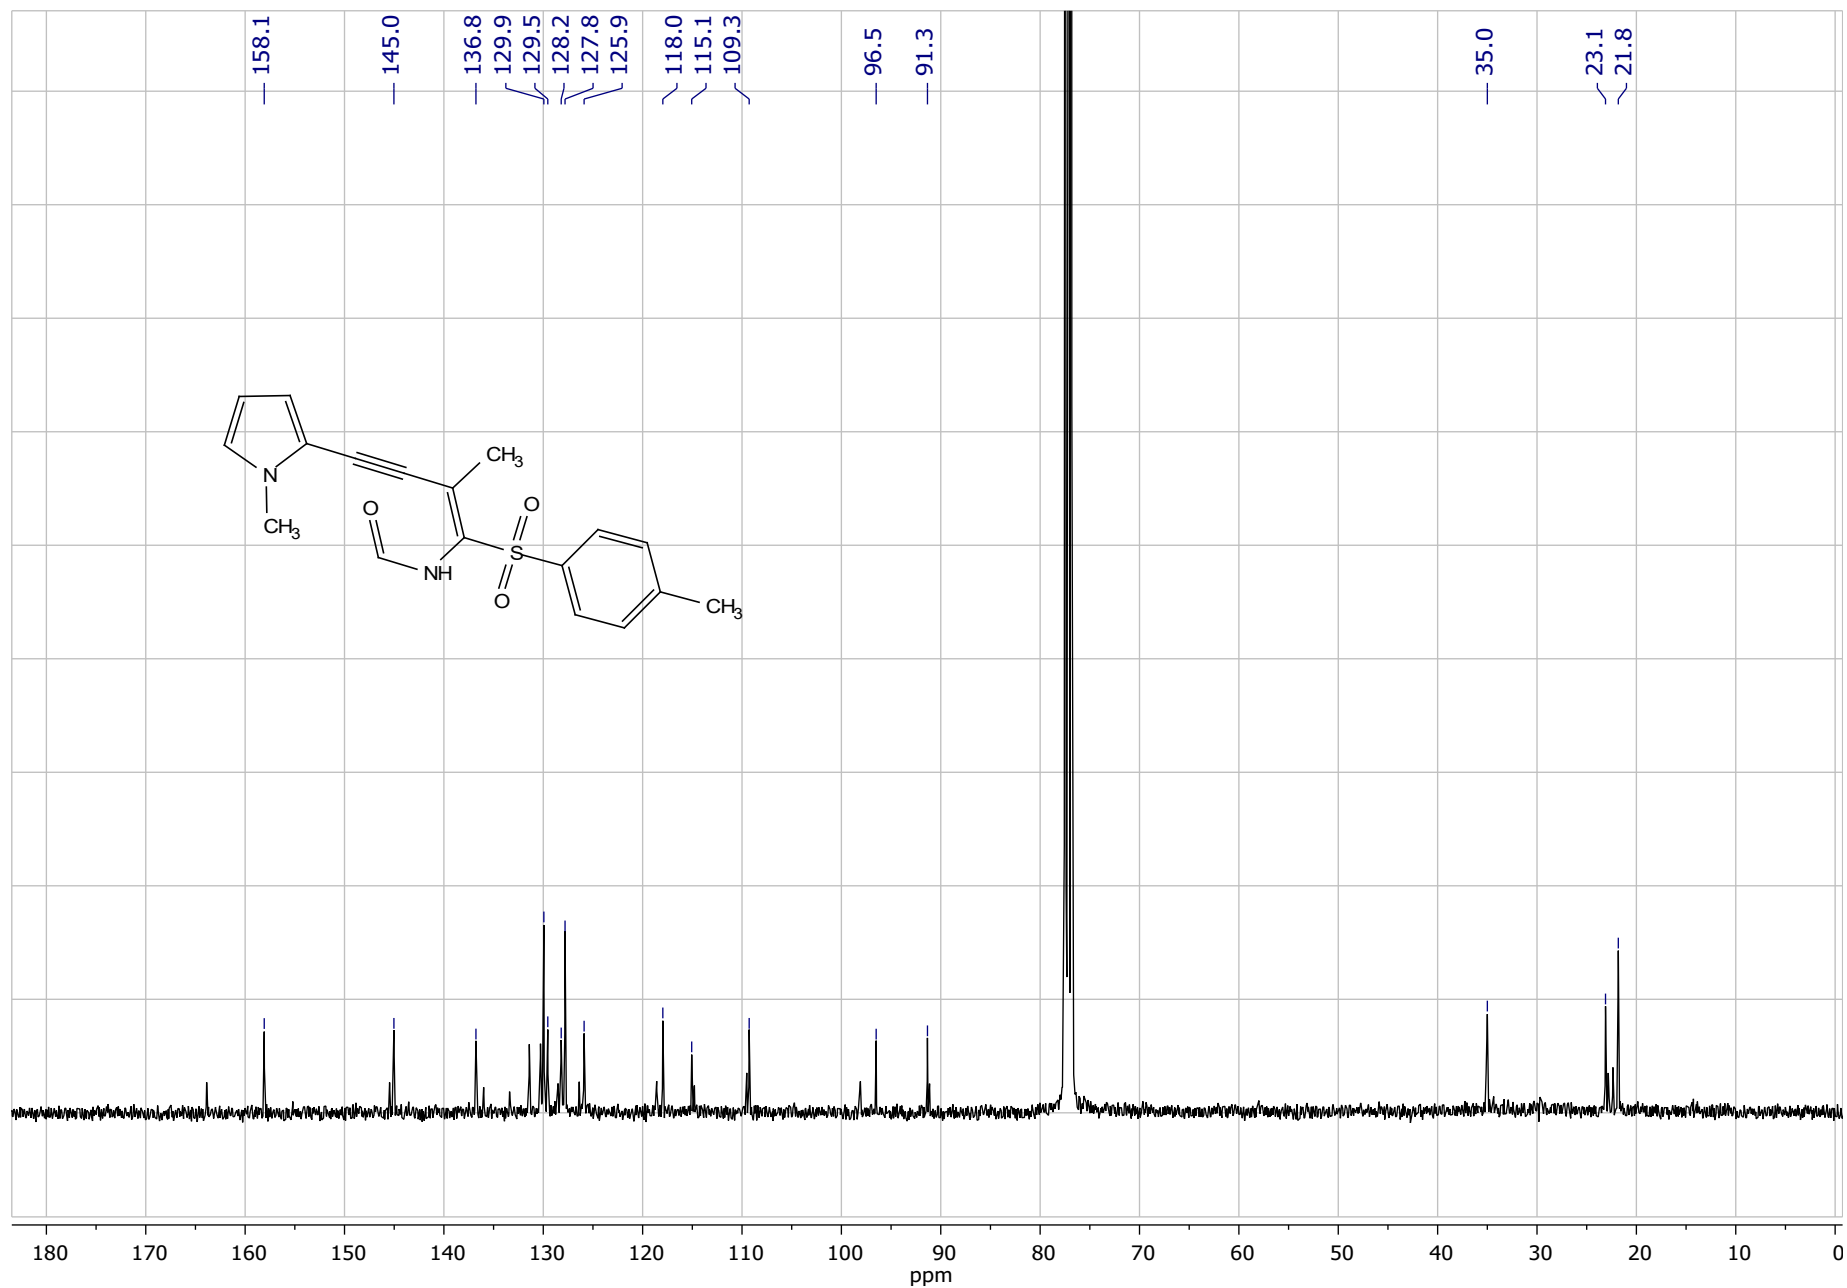

$^{13}\text{C}$  NMR spectrum of (*Z*)-*N*-((*E*)-2-methyl-4-(1-methyl-1*H*-pyrrol-2-yl)-1-tosylbut-1-en-3-yn-1-yl)formimidic acid (**3b**) (in the mixture of **3a** and **3b**) in  $\text{CDCl}_3$ .

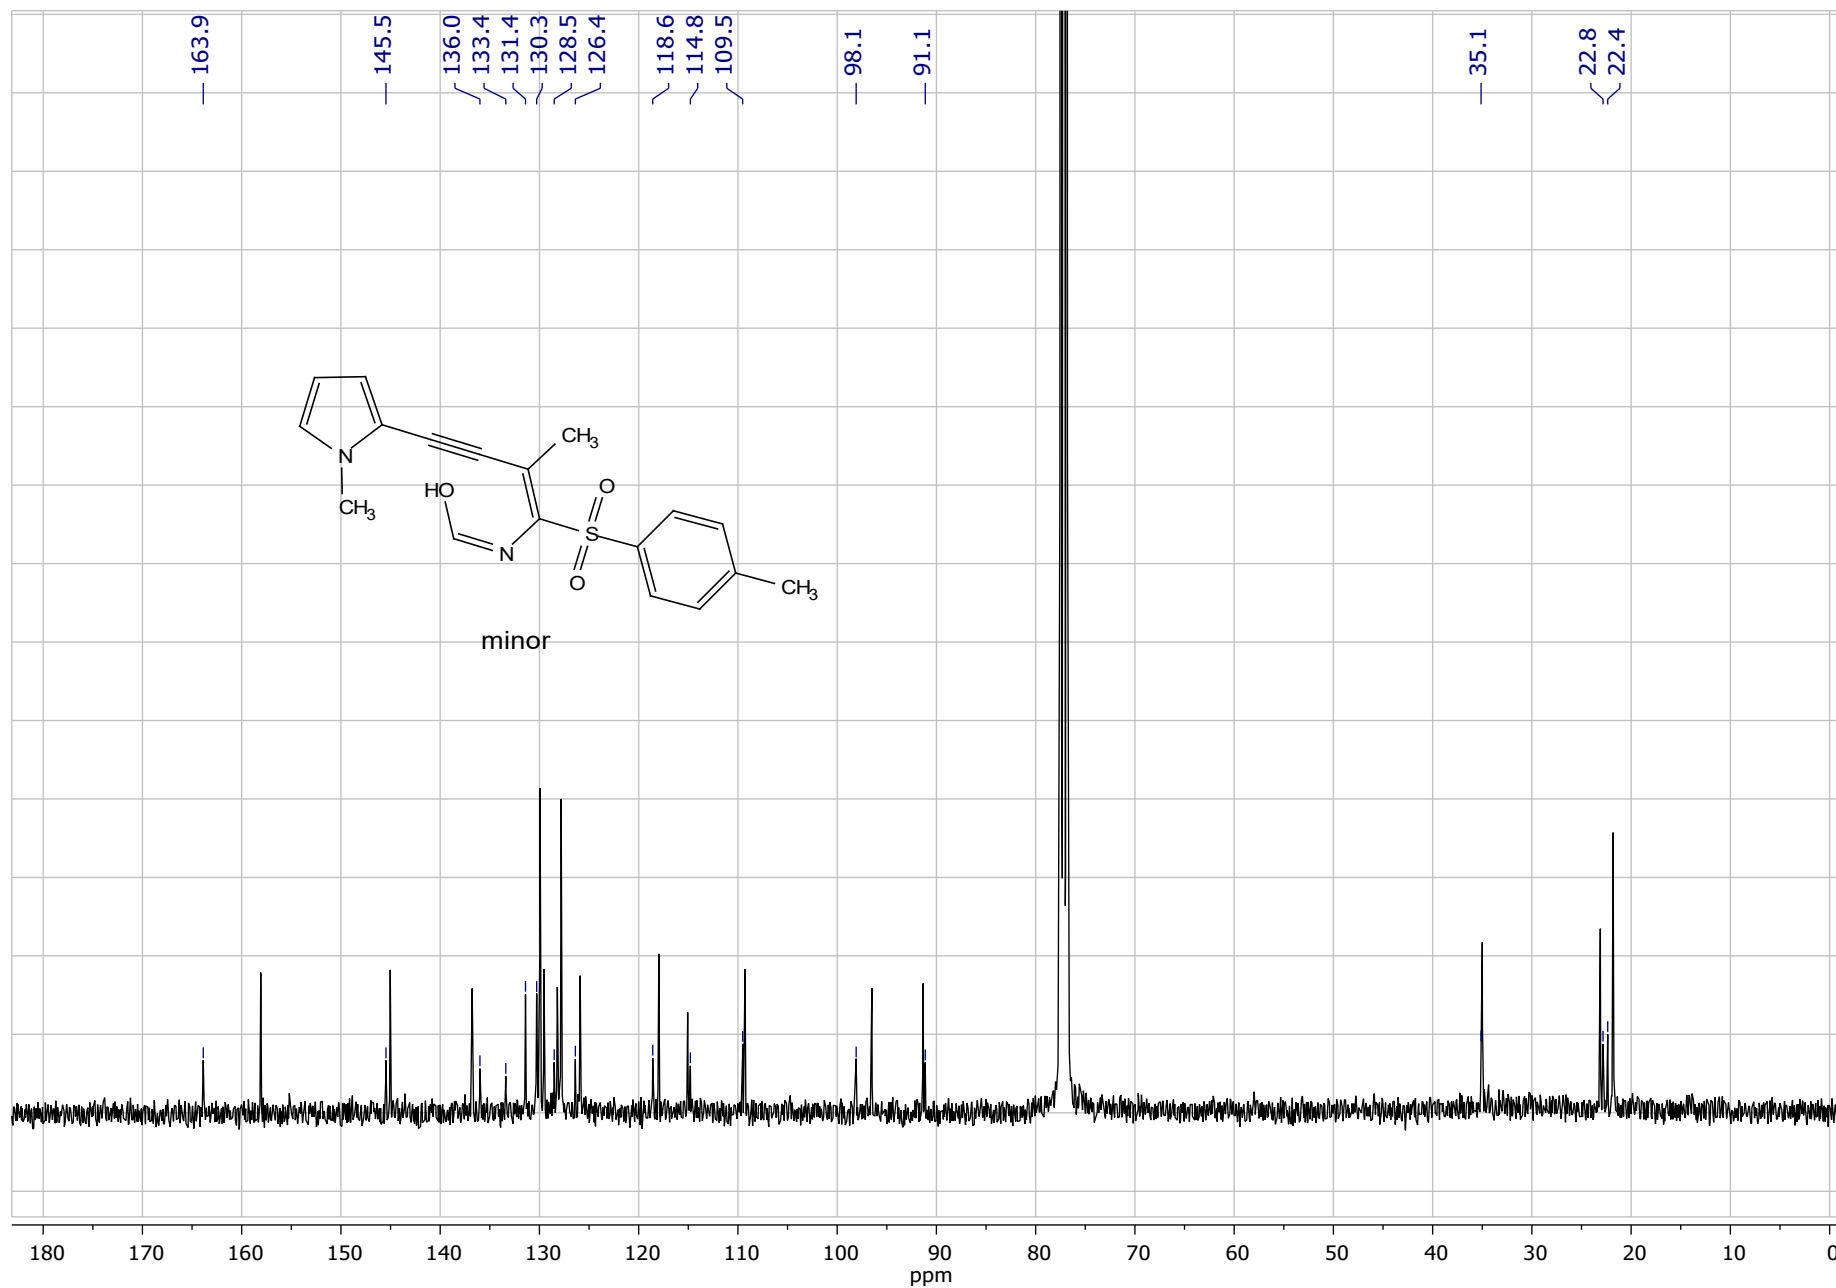

2D NMR Spectra of (*E*)-*N*-(2-methyl-4-(1-methyl-1*H*-pyrrol-2-yl)-1-tosylbut-1-en-3-yn-1-yl)formamide (**3a**) and (*Z*)-*N*-((*E*)-2-methyl-4-(1-methyl-1*H*-pyrrol-2-yl)-1-tosylbut-1-en-3-yn-1-yl)formimidic acid in CDCl<sub>3</sub> (**3b**):

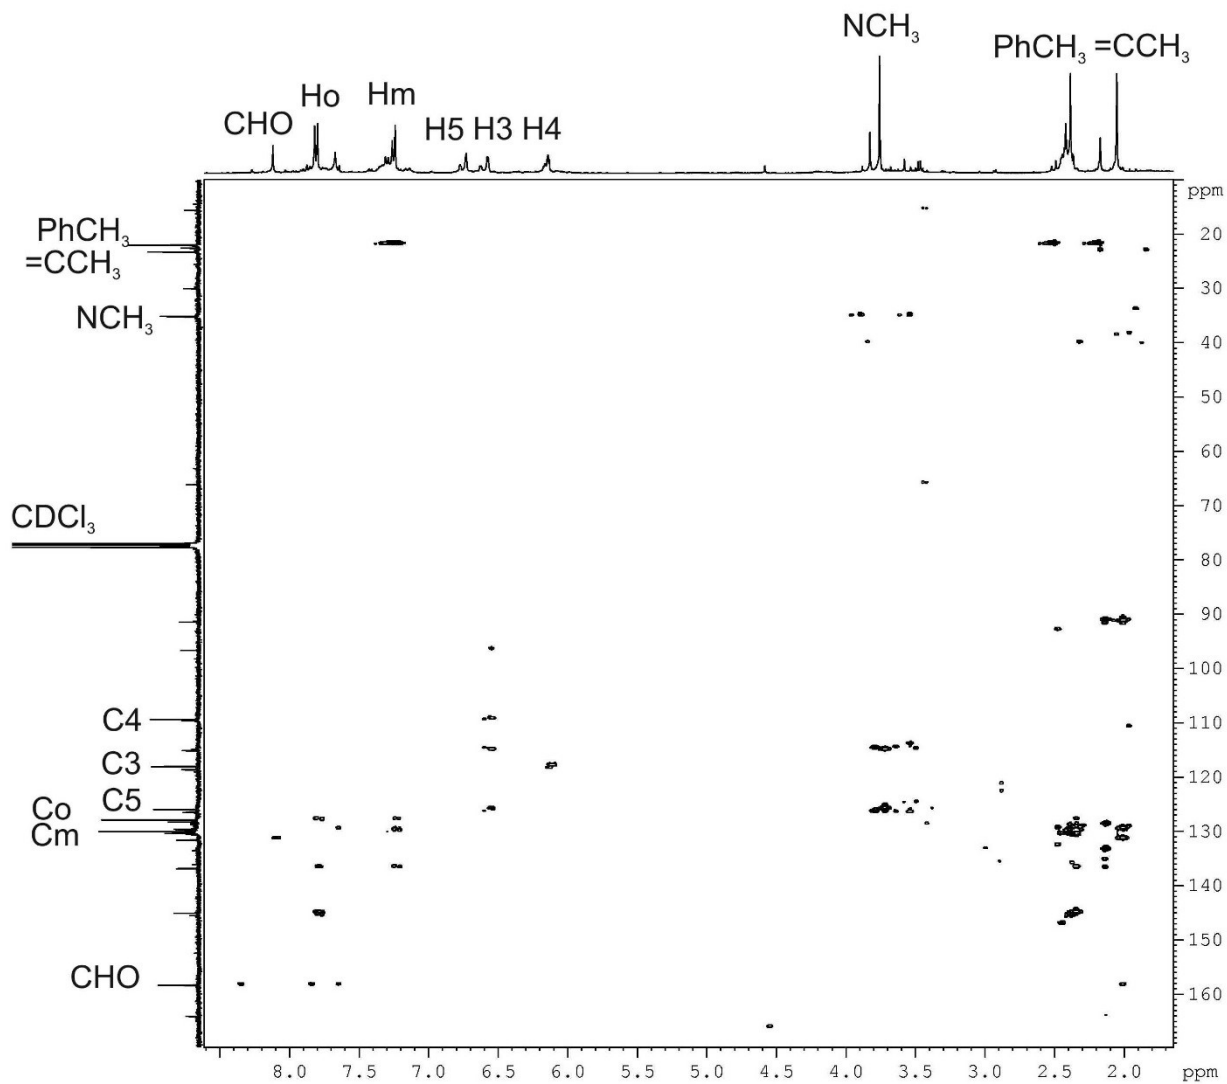

2D <sup>1</sup>H-<sup>13</sup>C HMBC spectrum of mixture of **3a** and **3b** (CDCl<sub>3</sub>), significant correlations observed in the spectrum are presented in the scheme below:

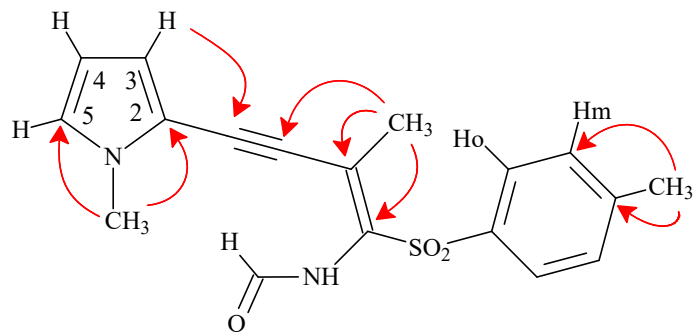

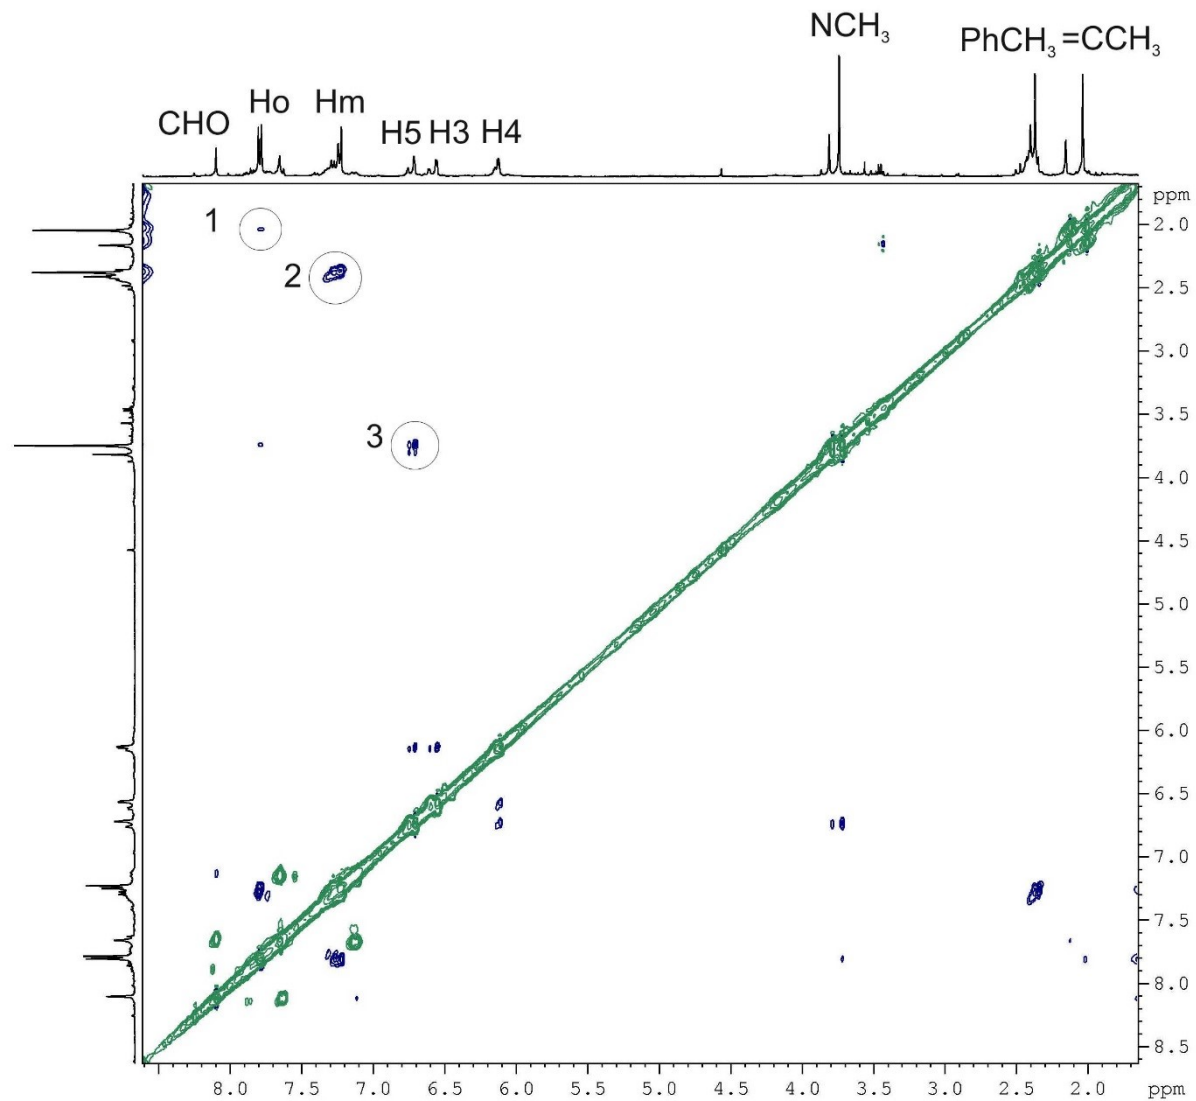

2D NOESY spectrum of mixture of **3a** and **3b** (400.1 MHz,  $\text{CDCl}_3$ ), significant correlations observed in the spectrum are presented in the scheme below:



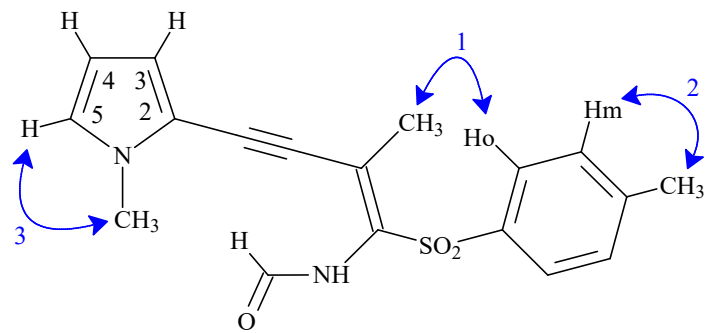

$^1\text{H}$  NMR spectrum of (*E*)-2-ethyl-4-phenyl-3-tosylbut-3-enitrile (**6**) in  $\text{CDCl}_3$ .

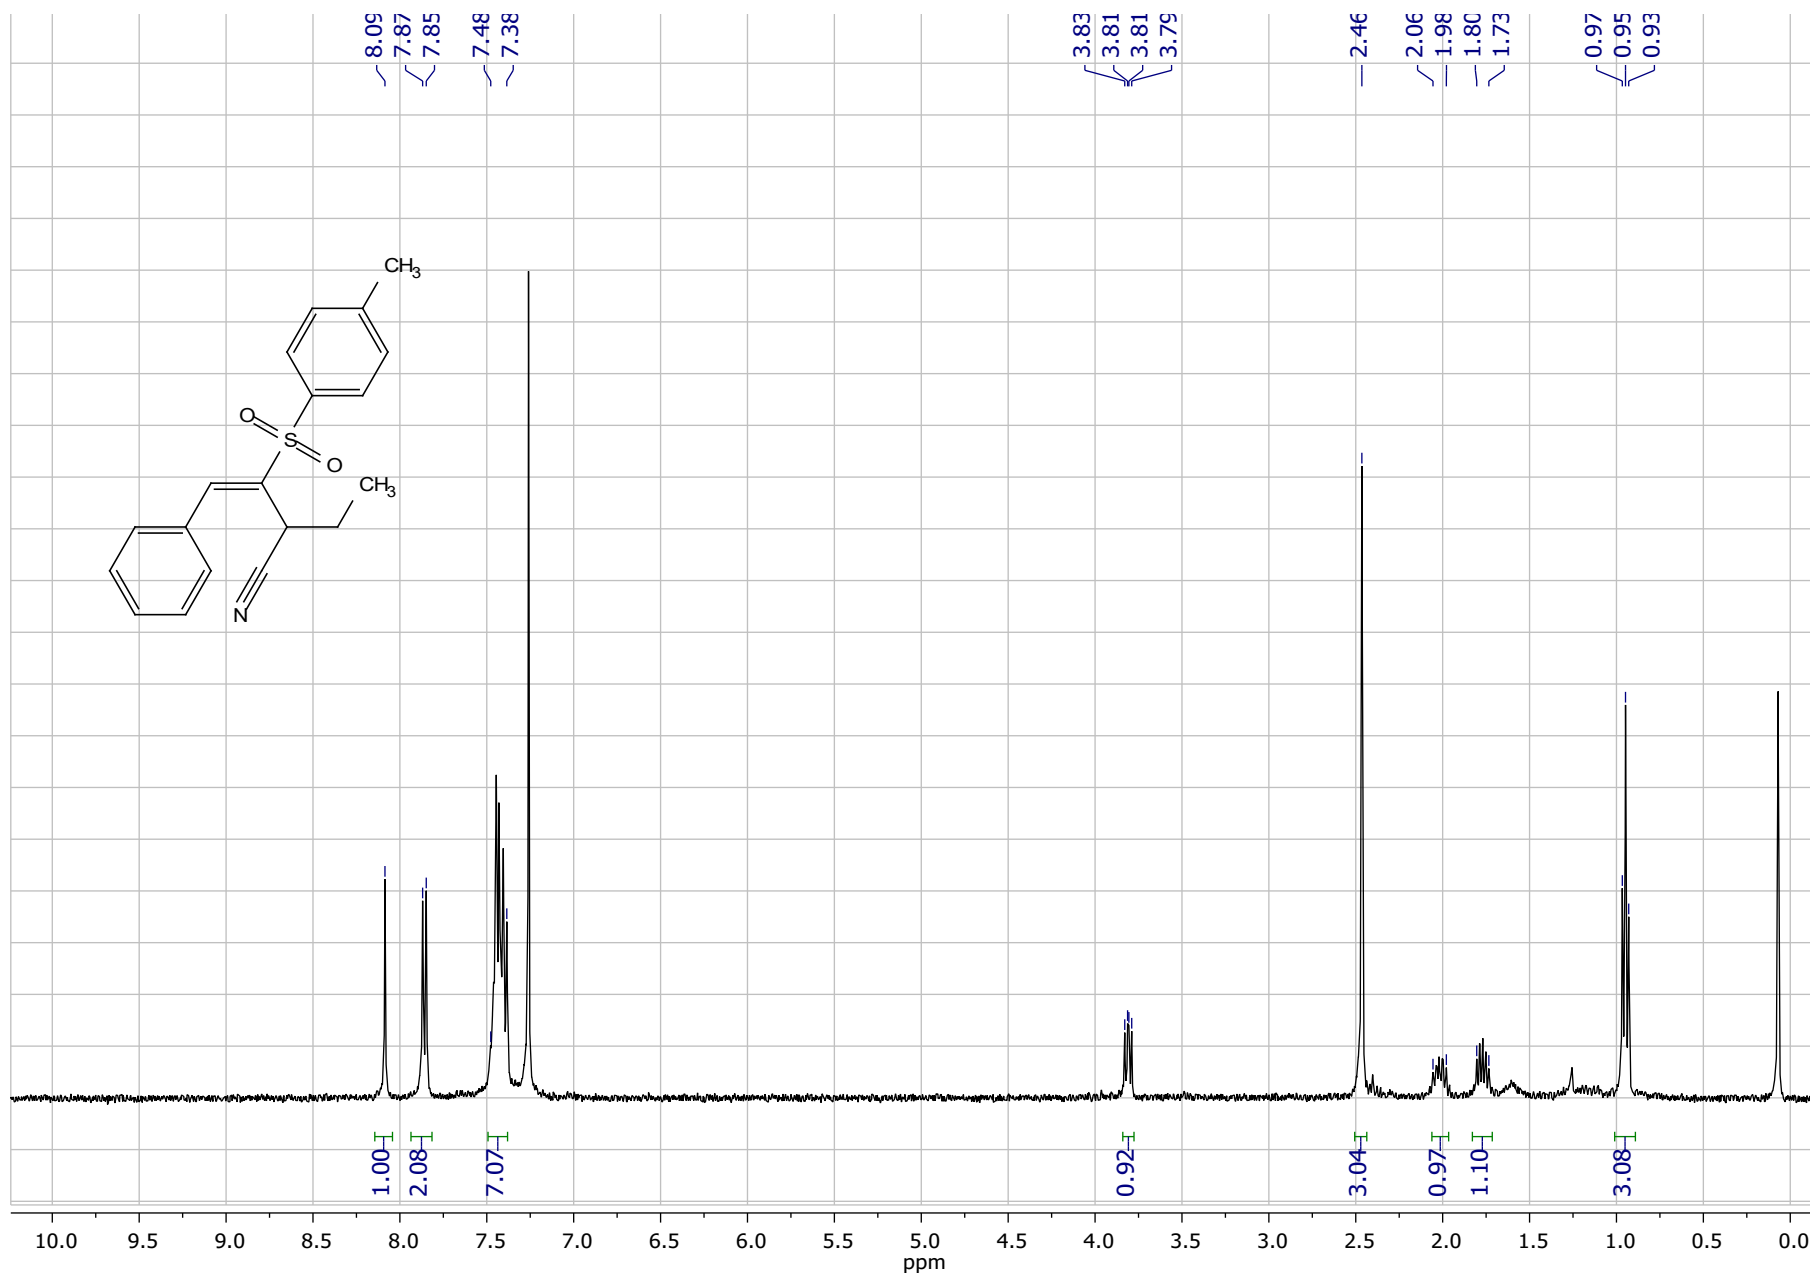

$^{13}\text{C}$  NMR spectrum of (*E*)-2-ethyl-4-phenyl-3-tosylbut-3-enenitrile (**6**) in  $\text{CDCl}_3$ .

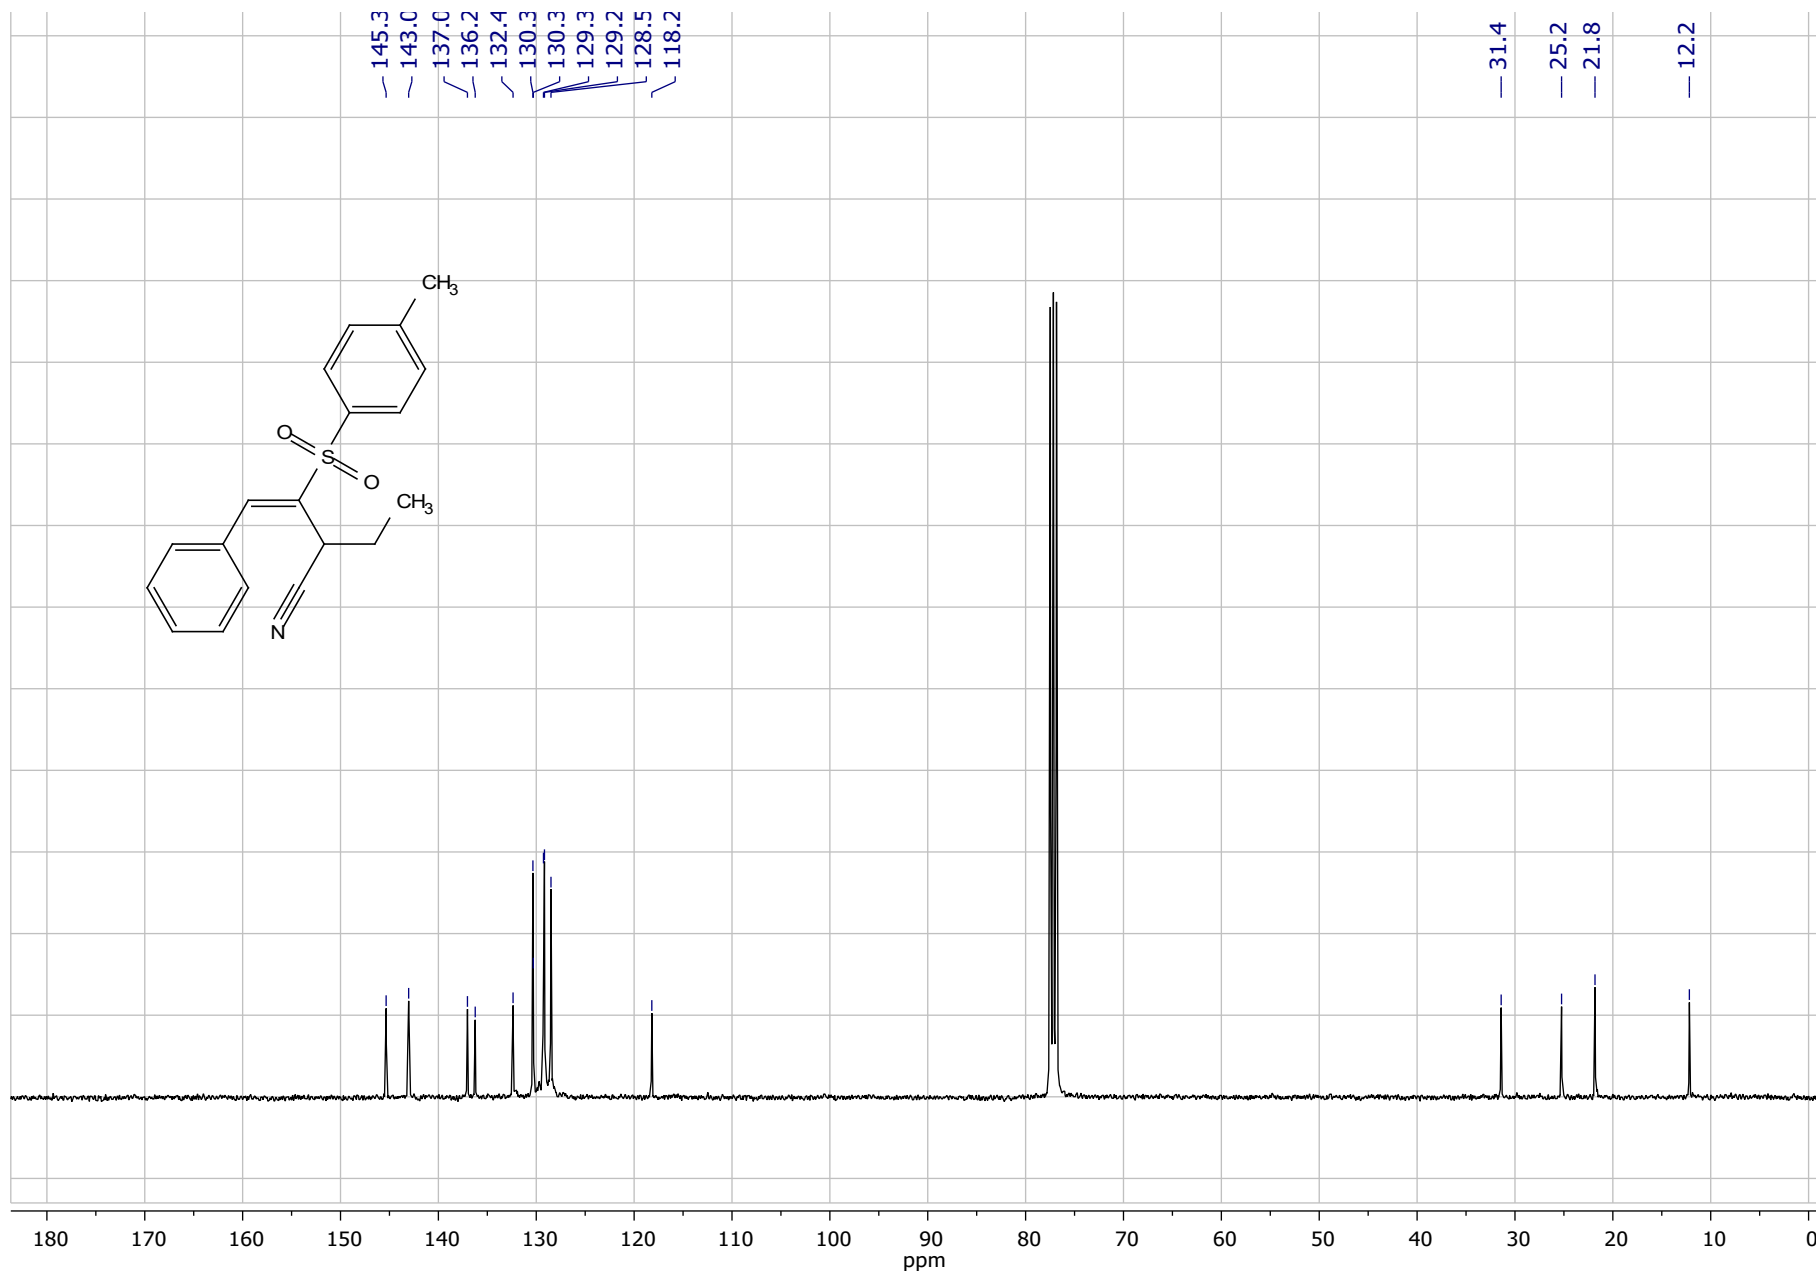

2D NMR Spectra of (*E*)-2-Ethyl-4-phenyl-3-tosylbut-3-enitrile in CDCl<sub>3</sub> (6)

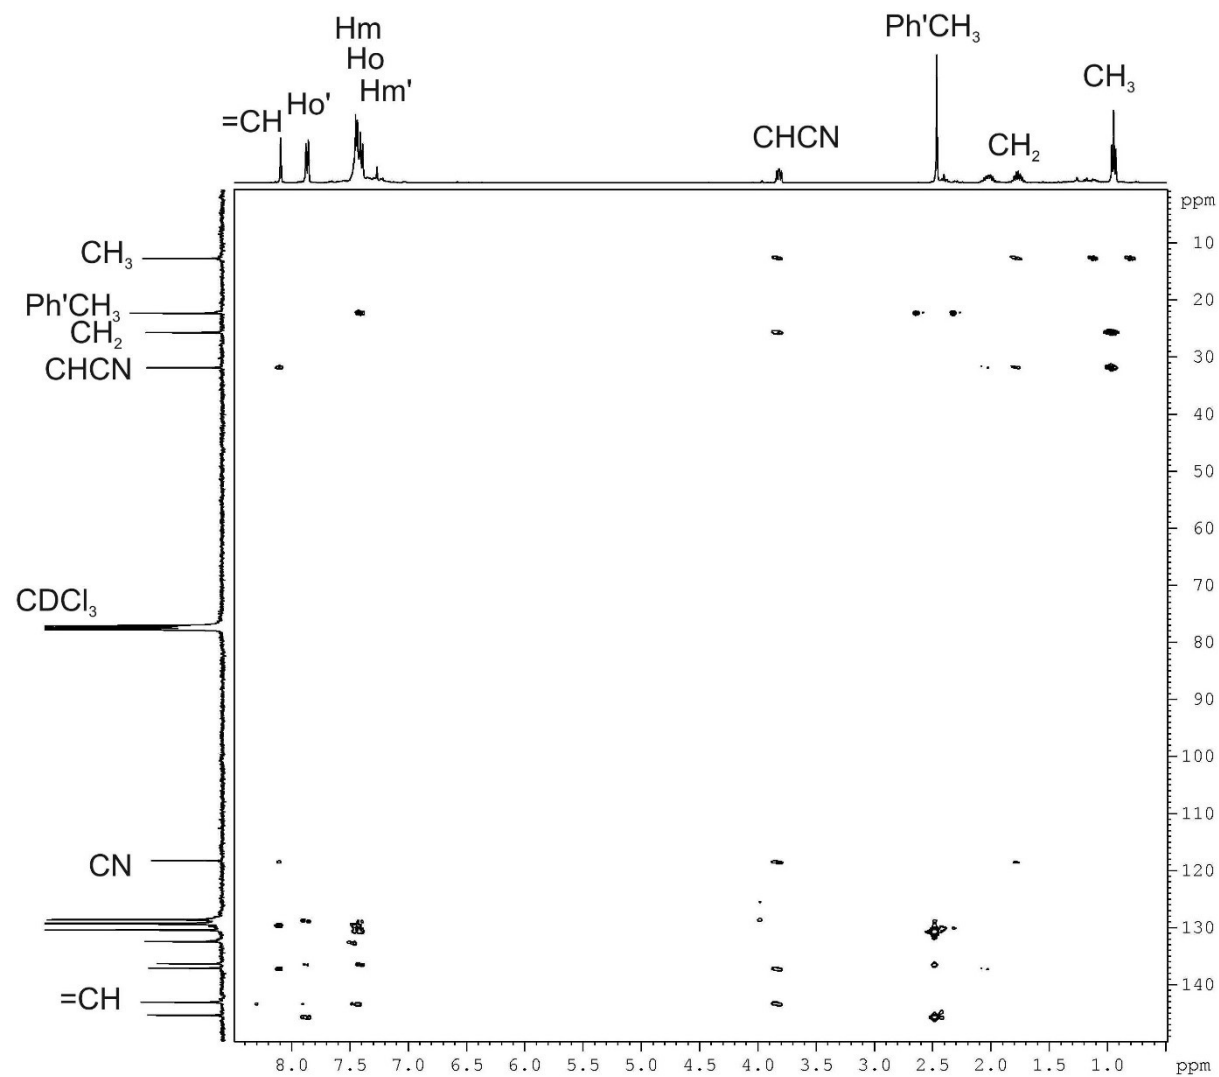

2D <sup>1</sup>H-<sup>13</sup>C HMBC spectrum of 6 (CDCl<sub>3</sub>), significant correlations observed in the spectrum are presented in the scheme below:

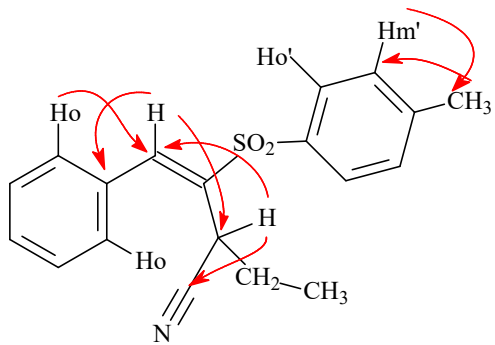

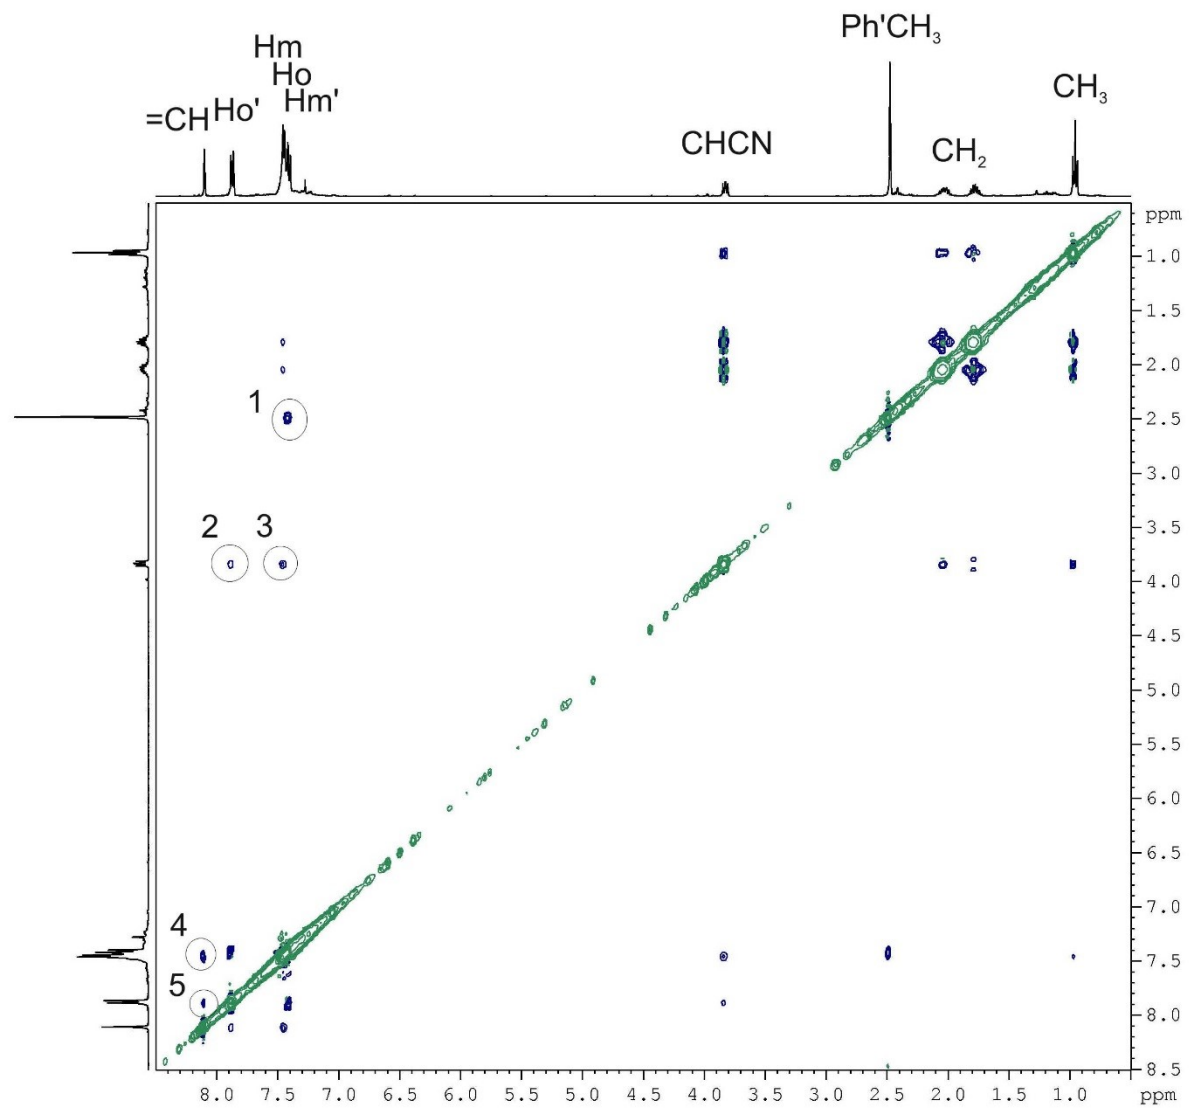

2D NOESY spectrum of **6** (400.1 MHz,  $\text{CDCl}_3$ ), significant correlations observed in the spectrum are presented in the scheme below:

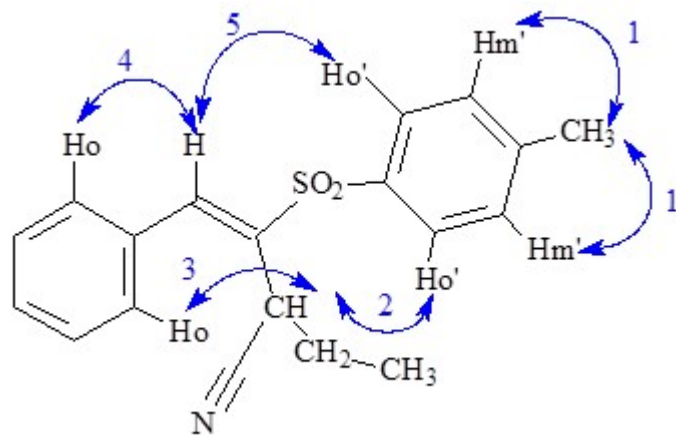

Supplement: d2nj02827a1.pdf [file d2nj02827a1.pdf]
